# Supplementary material for: Fatty liver predicts the risk for cardiovascular events in middle-aged population: a population-based cohort study
Source: PubMed Central journal article supplement — BMJ Open. 2014 Mar 20;4(3):e004973. doi: 10.1136/bmjopen-2014-004973 (PMC3963104; doi:10.1136/bmjopen-2014-004973), 2014-03-20
Supplement: bmjopen-2014-004973.draft_revisions.pdf [file bmjopen-2014-004973.draft_revisions.pdf]

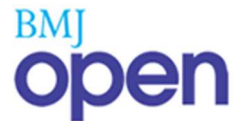

## Fatty liver predicts the risk for cardiovascular events

|                                 |                                                                                                                                                                                                                                                                                                                                                                                                                     |
|---------------------------------|---------------------------------------------------------------------------------------------------------------------------------------------------------------------------------------------------------------------------------------------------------------------------------------------------------------------------------------------------------------------------------------------------------------------|
| Journal:                        | <i>BMJ Open</i>                                                                                                                                                                                                                                                                                                                                                                                                     |
| Manuscript ID:                  | bmjopen-2013-003202                                                                                                                                                                                                                                                                                                                                                                                                 |
| Article Type:                   | Research                                                                                                                                                                                                                                                                                                                                                                                                            |
| Date Submitted by the Author:   | 10-May-2013                                                                                                                                                                                                                                                                                                                                                                                                         |
| Complete List of Authors:       | Pisto, Pauliina; Institute of Clinical Medicine, Department of Internal Medicine<br>Santaniemi, Merja; Institute of Clinical Medicine, Department of Internal Medicine<br>Bloigu, Risto; Medical Informatics and Statistics Research Group,<br>Ukkola, Olavi; Institute of Clinical Medicine, Department of Internal Medicine<br>Kesäniemi, Antero; Institute of Clinical Medicine, Department of Internal Medicine |
| <b>Primary Subject Heading</b>: | Cardiovascular medicine                                                                                                                                                                                                                                                                                                                                                                                             |
| Secondary Subject Heading:      | Cardiovascular medicine, Diabetes and endocrinology                                                                                                                                                                                                                                                                                                                                                                 |
| Keywords:                       | Coronary heart disease < CARDIOLOGY, Myocardial infarction < CARDIOLOGY, General diabetes < DIABETES & ENDOCRINOLOGY, Hepatology < INTERNAL MEDICINE                                                                                                                                                                                                                                                                |
|                                 |                                                                                                                                                                                                                                                                                                                                                                                                                     |

SCHOLARONE™  
Manuscripts

only

1  
2  
3  
4 **1 Fatty liver predicts the risk for cardiovascular events**

5  
6  
7 2 Pauliina Pisto<sup>1</sup>, Merja Santaniemi<sup>1</sup>, Risto Bloigu<sup>2</sup>, Olavi Ukkola<sup>1</sup>, Y. Antero Kesäniemi<sup>1</sup>

8  
9  
10 3 <sup>1</sup>Institute of Clinical Medicine, Department of Internal Medicine and Biocenter Oulu,  
11 University of Oulu, and Clinical Research Center, Oulu University Hospital, Oulu, Finland,  
12  
13 P.O. Box 20, 90029 OYS, Finland

14  
15  
16 6 <sup>2</sup>Medical Informatics and Statistics Research Group, University of Oulu, Aapistie 7, P.O. Box  
17  
18 5000, 90014 Oulu, Finland

19  
20  
21 8 **Contact information:** Pauliina Pisto, corresponding author

22  
23  
24 9 University of Oulu

25  
26  
27 10 Institute of Clinical Medicine

28  
29  
30 11 Department of Internal medicine

31  
32  
33 12 P.O. Box 5000, 90014 Oulu, Finland

34  
35  
36 13 Tel.: +35885376310

37  
38  
39 14 Fax: +35885376318

40  
41  
42 15 E-mail: pauliina.pisto@oulu.fi

43  
44  
45 16 **Word count:** 5093

46  
47  
48 17 **Keywords:** coronary disease, ectopic fat, insulin resistance, risk factors, stroke

49  
50  
51 18 **Financial support:** This study was supported by the Finnish Foundation for Cardiovascular  
52  
53  
54  
55 19 Research, dated 16 Apr, 2012.

1  
2  
3 20 **Disclosure summary:** Authors report no conflict of interests.  
4  
5  
6 21

7 22 **ABSTRACT**

9  
10 23 **Objective:** We investigated if the differences in liver fat accumulation would predict the  
11  
12 24 development of non-fatal and fatal atherosclerotic endpoints (coronary heart disease and  
13  
14 25 stroke).

15  
16 26 **Design, setting and participants:** Our study group is a population-based, randomly recruited  
17  
18 27 cohort (OPERA), initiated in 1991. The cohort consisted of 988 middle-aged Finnish subjects.

19  
20 28 **Intervention:** Total mortality and hospital events were followed up to 2009 based on the  
21  
22 29 registry of the National Institute for Health and Welfare and the National death registry.

23  
24 30 **Main outcome measure:** The severity of liver adiposity was measured by ultrasound and  
25  
26 31 divided into three groups (0-2). Cox regression analysis was used in the statistical analysis.

27  
28 32 **Results:** In the follow-up of years 1991-2009, 13.5% of the subjects with non-fatty liver,  
29  
30 33 24.2% of subjects having moderate liver fat accumulation and 29.2% of the subjects having  
31  
32 34 severe fatty liver experienced a cardiovascular event during the follow-up time ( $p < 0.001$ ).  
33  
34 35 Severe liver fat accumulation predicted the risk for future risk of cardiovascular event even  
35  
36 36 when adjusted for age, gender and study group (HR 1.92, CI 1.32-2.80,  $p < 0.01$ ). When  
37  
38 37 further adjustments for smoking, alcohol consumption, LDL-cholesterol, BMI and systolic  
39  
40 38 blood pressure were conducted, the risk still remained statistically significant (HR 1.74, CI  
41  
42 39 1.16-2.63,  $p < 0.01$ ). Statistical significance disappeared with further adjustment for QUICKI.

43  
44 40 **Conclusions:** Liver fat accumulation increases the risk of future cardiovascular disease event  
45  
46 41 in long-term follow-up but it seems to be dependent on insulin sensitivity.  
47  
48  
49  
50  
51  
52  
53  
54  
55  
56  
57  
58  
59  
60

1  
2  
3 45 **Article focus**

4  
5 46 1 To investigate if the differences in liver fat accumulation predict the risk for development of  
6 47 fatal or nonfatal atherosclerotic endpoints such as coronary heart disease and stroke.  
7

8 48  
9

10 49 **Key messages**

11  
12 50 1 Subjects with ultrasound-diagnosed fatty liver have cardiovascular disease more often  
13 51 compared to the subjects without fat in the liver

14  
15 52 2 Severe liver fat accumulation increases the risk of a future cardiovascular event and  
16 53 mortality to cardiovascular disease over the long-term follow-up but it does seem to be  
17 54 dependent on insulin sensitivity

18  
19 55 3 Severe fatty liver predicts the risk for overall mortality but the association is dependent on  
20 56 traditional metabolic risk factors

21  
22 57 **Strengths and limitations of the study**

23  
24 58 1 Study seems to be the first follow-up study with a large population-based study group and a  
25 59 very long follow-up time

26  
27 60 2 Official registers used in event diagnoses - data is accurate and the classification is  
28 61 systematic

29  
30 62 3 Grade of liver brightness was measured by ultrasound, which has a high specificity but low  
31 63 sensitivity  
32  
33 64

34  
35 65 **Introduction**

36  
37  
38 66 Non-alcoholic fatty liver disease (NAFLD) refers to liver disorders such as abnormal fat  
39 67 accumulation, which exists in a spectrum ranging from steatosis with no inflammation to non-  
40 68 alcoholic steatohepatitis (NASH), which can ultimately lead to liver cirrhosis <sup>1</sup>. The  
41 69 prevalence of NAFLD is estimated to range from 20 to 30% of population in Western  
42 70 countries, being the leading cause of liver disorders <sup>2</sup>. It is associated with obesity, type 2  
43 71 diabetes mellitus (T2DM) and hyperlipidemia <sup>1</sup>. NAFLD is commonly regarded as a hepatic  
44 72 manifestation of the metabolic syndrome and both conditions share several risk factors for  
45 73 cardiovascular disease (CVD) <sup>2,3</sup>.  
46  
47  
48  
49  
50  
51  
52  
53  
54  
55  
56  
57  
58  
59  
60

1  
2  
3 75 In 2008, the prevalence of CVD in adults ( $\geq 20$  years) in United States was 36.2%<sup>4</sup>. Every  
4  
5 76 year, 4.3 million subjects die for CVD in Europe causing nearly half of the all deaths (48%)<sup>5</sup>.  
6  
7 77 So-called traditional risk factors for cardiovascular disease are age, gender, smoking, high  
8  
9 78 low-density lipoprotein (LDL) cholesterol concentration, hypertension and diabetes<sup>6</sup>. In  
10  
11 79 addition, total body fatness as well as abdominal fat accumulation increase independently the  
12  
13 80 risk of CVD and insulin resistance is regarded to be an important factor linking visceral  
14  
15 81 adiposity to cardiovascular risk<sup>7</sup>. Adipose tissue is now recognized as a significant endocrine  
16  
17 82 organ as adipocytes and macrophages infiltrating adipocytes secrete a number of bioactive  
18  
19 83 mediators, such as adipokines, proinflammatory cytokines and hypofibrinolytic markers<sup>6</sup> that  
20  
21 84 may lead to oxidative stress and endothelial dysfunction, finally leading to atherosclerosis<sup>8</sup>.  
22  
23  
24  
25  
26  
27  
28

29 86 NAFLD and CVD share several molecular mechanisms<sup>9,10</sup>. Fatty liver might play a part in  
30  
31 87 the pathogenesis of CVD through the overexpression and systemic release of several  
32  
33 88 inflammatory, hemostatic<sup>11</sup> and oxidative-stress mediators or via contributing to whole-body  
34  
35 89 insulin resistance and atherogenic dyslipidemia<sup>2</sup>. NAFLD has also been reported to be linked  
36  
37 90 with circulatory endothelial dysfunction<sup>3,12</sup>. Several investigators have reported that NAFLD  
38  
39 91 is associated with coronary artery disease<sup>3,12</sup> and increased carotid intima-media thickness<sup>13</sup>,  
40  
41 92  
42  
43  
44  
45  
46  
47  
48

49 94 It is known that subjects with fatty liver disease have an increased risk of suffering CVD<sup>3</sup>, but  
50  
51 95 whether NAFLD is an independent indicator of cardiovascular disease is still far from clear.  
52  
53 96 Long-term follow-up studies are needed to clarify the correlation between fatty liver and  
54  
55 97 CVD. The aim of our study was to investigate if fatty liver could predict independently the  
56  
57  
58  
59  
60

1  
2  
3  
4  
5  
6  
7  
8  
9  
10  
11  
12  
13  
14  
15  
16  
17  
18  
19  
20  
21  
22  
23  
24  
25  
26  
27  
28  
29  
30  
31  
32  
33  
34  
35  
36  
37  
38  
39  
40  
41  
42  
43  
44  
45  
46  
47  
48  
49  
50  
51  
52  
53  
54  
55  
56  
57  
58  
59  
60

98 risk for total mortality as well as non-fatal and fatal cardiovascular endpoints with a 19-year  
99 follow-up after adjusting for all known conventional risk factors.

100

## 101 **Materials and methods**

### 102 **Human subjects**

103 OPERA (Oulu Project Elucidating Risk of Atherosclerosis) is a population-based,  
104 epidemiological prospective cohort study designed to address the risk factors and disease end  
105 points of atherosclerotic cardiovascular diseases. Selection criteria of the study subjects have  
106 been described earlier <sup>15</sup>. In short, a total of 520 men and 525 women participated: 259 control  
107 men, 261 hypertensive men, 267 control women and 258 hypertensive women aged 40-59.  
108 Hypertensive participants were randomly selected from the national register for  
109 reimbursement of the costs of antihypertensive medication. For each hypertensive subject, an  
110 age- and sex-matched control subject was randomly selected from the same register. Informed  
111 consent in writing was obtained from each patient. The study protocol conformed to the  
112 ethical guidelines of the 1975 Declaration of Helsinki and this study was approved by the  
113 Ethical Committee of the Faculty of Medicine, University of Oulu.

114

### 115 **Determination of liver adiposity**

116 The determination of liver adiposity was based on liver-kidney contrast measured with  
117 ultrasonography <sup>16</sup> by one trained radiologist with extensive experience in abdominal  
118 ultrasound examinations. The severity of liver adiposity was based on the brightness of the  
119 liver and it was classified into three groups ranging from 0 to 2 (0 = normal bright, indicating

1  
2  
3 120 a non-fatty liver, 1 = medium bright, a moderate lipid accumulation and 2 = clearly bright, a  
4  
5 121 severe lipid accumulation and fatty liver) <sup>17</sup>.  
6  
7

8 122  
9

### 10 11 123 **Follow-up**

12  
13  
14 124 Both the hypertensive and the control men were recruited during December 1990 to May  
15  
16 125 1992 and the women approximately one year later (n=1045). In total, 1023 subjects had a  
17  
18 126 liver ultrasound result available at baseline. Mortality data were obtained from the National  
19  
20 127 Death Registry and the diagnoses of cardiovascular events were based on the registry of the  
21  
22 128 National Institute for Health and Welfare. The follow-up time ended December 31, 2009 or  
23  
24 129 whenever the first event occurred. Cardiovascular events included fatal and non-fatal  
25  
26 130 endpoints. Subjects with a previous hospital-diagnosed myocardial infarction or stroke (n=41)  
27  
28 131 at baseline were excluded. In total, 988 subjects participated in this part of the study.  
29  
30  
31

32 132  
33  
34  
35

36 133 CVD included a major coronary heart disease event (CHD) and stroke (excluding  
37  
38 134 subarachnoid hemorrhage, SAH) - whichever of these happened first. The evidence of CHD  
39  
40 135 was based on the following diagnosis: I20.0, I21, I22 [ICD-10, International Statistical  
41  
42 136 Classification of Diseases and Related Health Problems] / 410, 4110 [ICD-8/9] as the main  
43  
44 137 diagnosis (symptom or cause) and I21, I22 [ICD-10] / 410 [ICD-8/9] as a first side diagnosis  
45  
46 138 (symptom or cause) or second side diagnosis (symptom or cause) and third side diagnosis  
47  
48 139 (ICD-8/9 only) or if a subject had undergone coronary artery bypass graft (CABG) surgery or  
49  
50 140 angioplasty. CHD as a cause of death included I20–I25, I46, R96, R98 [ICD-10] / 410-414,  
51  
52 141 798 (not 7980A) [ICD-8/9] as the underlying cause of death or immediate cause of death and  
53  
54 142 I21 or I22 [ICD-10] / 410 [ICD-8/9] as first to third contributing cause of death. Stroke  
55  
56  
57  
58  
59  
60

1  
2  
3 143 (excluding SAH) included I61, I63 (not I636), I64 [ICD -10] / 431, 4330A, 4331A, 4339A,  
4  
5 144 4340A, 4341A, 4349A, 436 [ICD-9] / 431 (except 43101, 43191) 433, 434, 436 [ICD-8] as  
6  
7 145 main diagnosis (symptom or cause) or as a first or second side diagnosis (symptom or cause)  
8  
9 146 or as a third side diagnosis (ICD-8/9 only) or as an underlying cause of death or immediate  
10  
11 147 cause of death or as a first to third contributing cause of death <sup>18</sup>.

148

### 149 **Laboratory analyses**

150 Waist circumference, body mass index (BMI) and blood pressure were measured as described  
151 in previous study <sup>15</sup>.

152

153 Blood insulin and glucose concentrations were analyzed at 0, 60, and 120 min after  
154 administration of 75 g glucose <sup>17</sup>. Insulin sensitivity was assessed using fasting plasma insulin  
155 concentrations and a quantitative insulin sensitivity check index (QUICKI) {QUICKI=1/[log  
156 (fasting insulin)+log (fasting glucose)]} <sup>19</sup>.

157

158 Very-low-density lipoprotein (VLDL), high-density lipoprotein (HDL), low-density  
159 lipoprotein (LDL) and hs-CRP concentrations <sup>17</sup> as well as alanine aminotransferase (ALT)  
160 and gamma-glutamyltransferase (GGT) levels were measured as described previously <sup>16</sup>.

161 Alcohol consumption and smoking history were determined by validated questionnaires <sup>20</sup>.

162 Alcohol consumption was divided into three groups: 0 (n=161) mean alcohol consumption

163 less than 1g/week in men and women, 1 (n=767) mean consumption less than 210g/week in

164 men and less than 140 g/week in women, 2 (n=76) mean alcohol consumption more than



1  
2  
3 165 210g/week in men and more than 140g/week in women. Group 2 designates large-scale  
4  
5 166 alcohol consumers according to the guidelines <sup>21</sup>.  
6  
7  
8  
9 167

## 10 11 168 **Statistical analysis**

12  
13  
14 169 Statistical analysis was performed by using IBM SPSS Statistics for Windows, Version 20.0  
15  
16  
17 170 (Armonk, NY: IBM Corp.). Analysis of variance was used to compare the means of the  
18  
19 171 variables measured. Post hoc tests were performed using the Tukey method. Statistical  
20  
21 172 significances between percentages were measured by using  $\chi^2$  test. Cumulative survival rates  
22  
23 173 were estimated using Kaplan-Meier method. Cox regression analysis was performed to  
24  
25 174 investigate if liver brightness (fat) could predict the future risk for total mortality,  
26  
27 175 cardiovascular death or hospital events. A p value < 0.05 was regarded as significant.  
28  
29  
30  
31 176

32  
33  
34 177 Skewed variables (smoking, alcohol consumption, fasting insulin, fasting glucose,  
35  
36 178 triglyceride, ALT, GGT concentration, hs-CRP level) were logarithmically transformed to  
37  
38 179 improve normality before analysis of variance. We used three models with progressive  
39  
40 180 degrees of adjustments. Model 1 included study group (subjects with medicine-treated  
41  
42 181 hypertension and their age- and sex-matched controls), age and gender. Model 2 included  
43  
44 182 further adjustments for smoking, alcohol consumption, systolic blood pressure, LDL-  
45  
46 183 cholesterol level and body mass index. Model 3 included further adjustment for QUICKI. We  
47  
48 184 carried out sensitivity analyses: in the analyses of cardiovascular events, we added all  
49  
50 185 covariates one by one and investigated if the hazard ratios (HR) changed or remained stable  
51  
52  
53 186 when further adjustment with one covariate was performed. Model 4 included variables which  
54  
55  
56  
57  
58  
59  
60

1  
2  
3 187 were stable and were statistically significant in intermediate phases. Model 5 included stable  
4  
5 188 and significant covariates without QUICKI (Table 2).  
6  
7  
8  
9 189

10  
11 190 C-index was calculated for the model 1, model 3, model 4 and model 5 to assess the  
12  
13 191 discrimination of the risk markers. The analyses were performed in 250 bootstrap resamplings  
14  
15 192 to obtain 95% CI for c-index of each model.  
16  
17  
18  
19 193

## 20 21 22 194 **Results**

23  
24  
25 195 The main baseline characteristics of the study group are shown in Table 1.  
26  
27  
28  
29 196

30  
31  
32 197 *Table 1 about here*  
33  
34  
35 198

### 36 37 38 199 **Incidence of cardiovascular disease**

39  
40  
41 200 The median follow-up time was 212 (maximum 228) months. During the follow-up time,  
42  
43 201 13.5% of the subjects with no fat in the liver (97/720), 24.2% (30/124) of subjects having  
44  
45 202 moderate liver fat accumulation and 29.2% (42/144) of the subjects having severe fatty liver  
46  
47 203 experienced a CVD event ( $p < 0.001$ ). CVD was the cause of death in 3.6% of the subjects  
48  
49 204 with non-fatty liver and 8.1% of the subjects with moderate liver fat accumulation, while  
50  
51 205 12.5% of the subjects with severe fatty liver ( $p < 0.001$ ).  
52  
53  
54  
55 206

1  
2  
3 207 Severe liver fat accumulation predicted the risk for future risk of cardiovascular event when  
4  
5 208 adjusted for age, gender and study group (Model 1: HR 1.92, CI 1.32-2.80,  $p < 0.01$ ) (Table  
6  
7 209 2). When further adjustments were made for smoking, alcohol consumption, LDL-cholesterol,  
8  
9 210 BMI and systolic blood pressure (Model 2: HR 1.74, CI 1.16-2.63), the risk still remained  
10  
11 211 statistically significant ( $p < 0.01$ ). Statistical significance disappeared when further  
12  
13 212 adjustment for QUICKI was performed (Model 3: HR 1.49, CI 0.97-2.30,  $p=0.071$ ). In the  
14  
15 213 CVD event sensitivity analyses, all covariates were added one by one and it was examined  
16  
17 214 whether the hazard ratios would change or remain stable. After adjusting for the statistically  
18  
19 215 significant variables (including quick index) in the sensitivity analyses, the association  
20  
21 216 between severe fatty liver was no longer significant (Model 4: HR 1.43, CI 0.93-2.18, NS).  
22  
23 217 When QUICKI was not added into Model 5, severe fatty liver did predict the risk for future  
24  
25 218 risk for CVD event (HR 1.76, CI 1.21- 2.56,  $p < 0.001$ ) (Table 2). The c-index decreased  
26  
27 219 when the risk factors were removed from the model (Table 3).  
28  
29  
30  
31  
32  
33  
34  
35

36 221 *Tables 2 and 3 about here*

37  
38  
39 222

40  
41  
42 223 The future risk of death from CVD in participants with severe fat accumulation was  
43  
44 224 significant when age, gender and study group were added as covariates (Model 1: HR 2.95, CI  
45  
46 225 1.58-5.51,  $p < 0.01$ ). Even after further adjustments with other conventional risk factors  
47  
48 226 (Model 2: HR 2.04, CI 1.03-4.05), statistical significance remained ( $p < 0.05$ ). When QUICKI  
49  
50 227 was added as the covariate, then significance disappeared (Model 3: HR 1.64, CI 0.79-3.43,  
51  
52 228 NS) (Fig 1.).  
53  
54  
55

56  
57 229  
58  
59  
60

1  
2  
3 230 *Figure 1 about here*

4  
5  
6 231

7  
8  
9 232 **Fatty liver and total mortality**

10  
11  
12 233 In total, 11.9% of the participants not having fatty liver, 18.5% of the subjects having  
13 234 moderate fatty liver and 22.2% of the subjects with severe fatty liver died from all causes ( $p <$   
14  
15 235 0.01). According to Model 1, severe fat accumulation predicted the risk for mortality from all  
16  
17 236 causes when age, gender and study group were added as covariates (HR 1.60, CI 1.05-2.43,  $p$   
18  
19 237  $< 0.05$ ). The significance disappeared when body mass index was added as a covariate (data  
20  
21 238 not shown).  
22  
23  
24  
25  
26  
27  
28  
29

30 240 We performed all Cox regression analyses after excluding the men consuming more than 210  
31  
32 241 g alcohol and the women drinking more than 140 g alcohol per week. This exclusion did not  
33  
34 242 have any effect on the results (data not shown).  
35  
36  
37

38 243 We performed all Cox regression analyses after excluding patients with insulin treated  
39  
40 244 diabetes mellitus ( $n=9$ ), cortisone treatment at baseline ( $n=41$ ) and previous diagnosis for  
41  
42 245 liver disease ( $n=15$ ) (e.g., virus, medications). This exclusion did not have any effect on the  
43  
44 246 results (data not shown).  
45  
46

47 247 **Discussion**

48  
49  
50 248 The incidences of non-alcoholic fatty liver disease and cardiovascular disease are  
51  
52 249 continuously increasing in the Western world. The question if NAFLD is only a marker or  
53  
54 250 also an early mediator of cardiovascular disease is still largely unanswered. According to the  
55  
56 251 results of the present study, which had an approximately 19-year follow-up fatty liver does  
57  
58  
59  
60

1  
2  
3 252 predict the future risk for death from all causes, death from cardiovascular disease and risk of  
4  
5 253 cardiovascular events. Insulin sensitivity seems to play a more dominant role in the  
6  
7 254 development of cardiovascular events.  
8  
9

10 255

11  
12  
13 256 Only a few studies have investigated the risk for future cardiovascular risk among subjects  
14  
15 257 with ultrasound-diagnosed fatty liver <sup>22, 23</sup>. There are a few follow-up-studies examining  
16  
17 258 whether the fatty liver increases the risk for total mortality <sup>24, 25</sup>. Larger follow-up studies with  
18  
19 259 ultrasound-diagnosed fatty liver investigating non-fatal and fatal cardiovascular endpoints are  
20  
21 260 needed. An association between NAFLD and CVD has been reported <sup>2, 22, 23, 26</sup> however several  
22  
23 261 earlier studies have used self-reported CVD history which may not be totally reliable.  
24  
25 262 Although earlier studies on the risk for future cardiovascular risk among subjects with fatty  
26  
27 263 liver have performed some adjustments, the full range of well-known CVD risk factors have  
28  
29 264 been rarely considered <sup>27</sup>. These studies have used biochemical, radiological and histological  
30  
31 265 methodology for NAFLD diagnosis and staging, which leads to a challenging interpretation of  
32  
33 266 the results <sup>28, 29</sup>.  
34  
35  
36  
37  
38  
39  
40  
41

42 267

43 268 This study had an approximately 19-year follow-up time. When compared to earlier studies <sup>27,</sup>  
44  
45 269 <sup>29</sup> this study seems to be the first follow-up study with a large population-based randomly  
46  
47 270 selected study group and a very long follow-up time and ultrasound-diagnosed fatty liver. The  
48  
49 271 diagnosis of cardiovascular events was based on the registry of the National Institute for  
50  
51 272 Health and Welfare and mortality data were obtained from the National Death Registry. The  
52  
53 273 earlier verified FINRISK classification <sup>18</sup> was used to classify the events. Therefore, the  
54  
55 274 reliability of event diagnosis data is accurate and the classification is systematic. All subjects  
56  
57 275 who had myocardial infarction or stroke before baseline were excluded because a history of  
58  
59  
60

1  
2  
3 276 myocardial infarction is known to increase the risk for recurrent myocardial infarction or  
4  
5 277 cardiovascular death<sup>30</sup> and medication as well as lifestyle secondary prevention strategies are  
6  
7 278 intensive<sup>31</sup>.  
8  
9

10 279

11  
12  
13  
14 280 In the present study, severe fatty liver predicted the risk for overall mortality of any causes  
15  
16 281 when age, gender and study group were added covariates, a result in line with an earlier report  
17  
18 282<sup>32</sup>. In the published literature, NASH rather than simple steatosis has been stated to be linked  
19  
20 283 with decreased overall survival<sup>33</sup> although one study with a large cohort found no association  
21  
22 284 between NAFLD and overall mortality<sup>25</sup>. In our study, the association between severe fatty  
23  
24 285 liver and total mortality disappeared after further adjustment for BMI which means that  
25  
26 286 severe fatty liver is not a strong predictor for overall mortality. In earlier studies NAFLD,  
27  
28 287 especially NASH, has been reported to increase the risk for cardiovascular death<sup>27</sup>. In the  
29  
30 288 present study, severe fatty liver disease did predict the risk for cardiovascular death but the  
31  
32 289 association seemed to be dependent on insulin sensitivity.  
33  
34  
35

36  
37 290

38  
39  
40 291 The molecular mechanisms linking fatty liver with CVD have been investigated<sup>10, 34</sup>.  
41  
42 292 Enlarged visceral adipose tissue may explain why NAFLD associates with CVD<sup>10</sup>. In  
43  
44 293 individuals with visceral obesity, insulin resistance may contribute to impaired non-esterified  
45  
46 294 fatty acid (NEFA) metabolism<sup>7</sup> and the increasing NEFA flux to the liver may impair liver  
47  
48 295 metabolism leading to increased glucose metabolism and liver dysfunction<sup>6</sup>. The liver is one  
49  
50 296 of the targets of the resulting systemic abnormalities and the source of several proatherogenic  
51  
52 297 factors<sup>2</sup>, such as CRP, fibrinogen, plasminogen activator inhibitor-1 and other inflammatory  
53  
54 298 cytokines<sup>10</sup>. Furthermore, visceral adipose tissue and ectopic fat overexpress factors involved  
55  
56  
57  
58  
59  
60

1  
2  
3 299 in atherogenesis <sup>10</sup> such as NEFAs and proinflammatory cytokines, for instance interleukin-6  
4  
5 300 and tumor necrosis factor- $\alpha$  <sup>7</sup> leading to chronic systemic inflammation. In addition, hepatic  
6  
7 301 steatosis leads to overproduction of cholesterol-rich remnant particles <sup>3</sup>.  
8  
9

10 302

11  
12  
13 303 One limitation in this study may be that the grade of liver brightness was measured by  
14  
15 304 ultrasound. The invasive diagnostic technique of liver biopsy is regarded as the golden  
16  
17 305 standard, especially for the diagnosis of NASH <sup>35</sup>. Real time ultrasound using a combination  
18  
19 306 of sonographic findings does have a high specificity but it underestimates the prevalence of  
20  
21 307 hepatic steatosis when there is less than 20 % fat <sup>36</sup>. Nonetheless, the noninvasive ultrasound  
22  
23 308 method was chosen because taking liver biopsies from large groups of symptomless subjects  
24  
25 309 would have been ethically unjustifiable.  
26  
27  
28  
29

30 310

31  
32  
33 311 The OPERA study group consists of subjects with drug-treated hypertension and randomly  
34  
35 312 selected sex- and age-matched controls. Study group was added as a covariate to minimize  
36  
37 313 any selection bias.  
38  
39

#### 40 314 **Conclusions**

41  
42  
43  
44 315 Severe liver fat accumulation increases the risk of a future cardiovascular event and mortality  
45  
46 316 to cardiovascular disease over the long-term follow-up but it does seem to be dependent on  
47  
48 317 insulin sensitivity. Fatty liver also predicts the risk for overall mortality. However,  
49  
50 318 conventional cardiovascular disease risk factors seem to play a major role in developing death  
51  
52 319 from all causes. It would be beneficial to investigate larger cohorts and follow-up studies in  
53  
54 320 order to validate this result.  
55  
56  
57  
58  
59  
60

321

**322 Figure legend**

323 Title: Kaplan Meier cumulative survival rates censored for cardiovascular death in subjects  
324 with no fat in the liver, moderate fat accumulation and severe fat accumulation.

325 CVD was the cause of death in 3.6% of the subjects (26/720) with non-fatty liver and 8.1%  
326 of the subjects (10/124) with moderate liver fat accumulation, while 12.5% of the subjects  
327 with severe fatty liver (18/144). Cox regression analysis is used for adjustments. M1 (Model  
328 1): adjusted for study group, age and gender. M2 (Model 2): further adjustments for smoking,  
329 alcohol consumption, systolic blood pressure, LDL-cholesterol level and body mass index.  
330 M3 (Model 3): further adjustment for QUICKI. CVD, cardiovascular disease, CI, confidence  
331 interval, HR, hazard ratio, QUICKI, quantitative insulin sensitivity check index. \*\*  $p < 0.01$ ,  
332 \*  $p < 0.05$ .

333

**334 Acknowledgements**

335 The authors thank Markku Päivänsalo, MD, PhD, for the expert liver ultrasound examinations  
336 and Ms Saija Kortetjärvi, Ms Liisa Mannermaa, and Ms Leena Ukkola for the excellent  
337 technical assistance. M.Sc. Elina Malo and M.Sc. Meiju Saukko are thanked for the  
338 cooperation in organizing cardiovascular event and mortality data.

**339 References**

340 **1. Angulo P. Nonalcoholic fatty liver disease. *N Engl J Med* 2002; Apr 18;346(16):1221-**  
341 **31.**



- 1  
2  
3 342 2. Targher G, Day CP, Bonora E. Risk of cardiovascular disease in patients with  
4  
5 343 nonalcoholic fatty liver disease. *N Engl J Med* 2010; Sep 30;363(14):1341-50.  
6  
7  
8 344 3. Targher G, Arcaro G. Non-alcoholic fatty liver disease and increased risk of  
9  
10 345 cardiovascular disease. *Atherosclerosis* 2007; Apr;191(2):235-40.  
11  
12  
13  
14 346 4. Roger VL, Go AS, Lloyd-Jones DM, Adams RJ, Berry JD, Brown TM, et al. Heart  
15  
16 347 disease and stroke statistics--2011 update: a report from the American Heart  
17  
18 348 Association. *Circulation* 2011; Feb 1;123(4):e18-e209.  
19  
20  
21  
22 349 5. Allender S, Scarborough P, Peto V, Rayner M, Leal J, Luengo-Fernandez R, Gray A.  
23  
24 350 European cardiovascular disease statistics, 2008 ed. European Heart Network; 2008.  
25  
26  
27 351 6. Despres JP, Lemieux I. Abdominal obesity and metabolic syndrome. *Nature* 2006; Dec  
28  
29 352 14;444(7121):881-7.  
30  
31  
32  
33 353 7. Van Gaal LF, Mertens IL, De Block CE. Mechanisms linking obesity with  
34  
35 354 cardiovascular disease. *Nature* 2006; Dec 14;444(7121):875-80.  
36  
37  
38 355 8. Hansson GK. Inflammation, atherosclerosis, and coronary artery disease. *N Engl J*  
39  
40 356 *Med* 2005; Apr 21;352(16):1685-95.  
41  
42  
43  
44 357 9. Loria P, Lonardo A, Targher G. Is liver fat detrimental to vessels?: intersections in  
45  
46 358 the pathogenesis of NAFLD and atherosclerosis. *Clin Sci (Lond)* 2008; Jul;115(1):1-12.  
47  
48  
49 359 10. Targher G, Marra F, Marchesini G. Increased risk of cardiovascular disease in non-  
50  
51 360 alcoholic fatty liver disease: causal effect or epiphenomenon?. *Diabetologia* 2008;  
52  
53 361 Nov;51(11):1947-53.  
54  
55  
56  
57  
58  
59  
60

- 1  
2  
3 362 11. Targher G, Bertolini L, Scala L, Zoppini G, Zenari L, Falezza G. Non-alcoholic  
4  
5 363 hepatic steatosis and its relation to increased plasma biomarkers of inflammation and  
6  
7 364 endothelial dysfunction in non-diabetic men. Role of visceral adipose tissue. *Diabet Med*  
8  
9 365 2005; Oct;22(10):1354-8.
- 11  
12  
13 366 12. Wong VW, Wong GL, Yip GW, Lo AO, Limquiaco J, Chu WC, et al. Coronary  
14  
15 367 artery disease and cardiovascular outcomes in patients with non-alcoholic fatty liver  
16  
17 368 disease. *Gut* 2011; Dec;60(12):1721-7.
- 19  
20  
21 369 13. Brea A, Mosquera D, Martin E, Arizti A, Cordero JL, Ros E. Nonalcoholic fatty  
22  
23 370 liver disease is associated with carotid atherosclerosis: a case-control study. *Arterioscler*  
24  
25 371 *Thromb Vasc Biol* 2005; May;25(5):1045-50.
- 27  
28  
29 372 14. Sookoian S, Pirola CJ. Non-alcoholic fatty liver disease is strongly associated with  
30  
31 373 carotid atherosclerosis: a systematic review. *J Hepatol* 2008; Oct;49(4):600-7.
- 33  
34 374 15. Rantala AO, Kauma H, Lilja M, Savolainen MJ, Reunanen A, Kesaniemi YA.  
35  
36 375 Prevalence of the metabolic syndrome in drug-treated hypertensive patients and control  
37  
38 376 subjects. *J Intern Med* 1999; Feb;245(2):163-74.
- 40  
41  
42 377 16. Sampi M, Veneskoski M, Ukkola O, Kesaniemi YA, Horkko S. High plasma  
43  
44 378 immunoglobulin (Ig) A and low IgG antibody titers to oxidized low-density lipoprotein  
45  
46 379 are associated with markers of glucose metabolism. *J Clin Endocrinol Metab* 2010;  
47  
48 380 May;95(5):2467-75.
- 50  
51  
52 381 17. Pisto P, Ukkola O, Santaniemi M, Kesaniemi YA. Plasma adiponectin--an  
53  
54 382 independent indicator of liver fat accumulation. *Metabolism* 2011; Nov;60(11):1515-20.
- 55  
56  
57  
58  
59  
60

- 1  
2  
3 383 18. Pajunen P, Jousilahti P, Borodulin K, Harald K, Tuomilehto J, Salomaa V. Body fat  
4  
5 384 measured by a near-infrared interactance device as a predictor of cardiovascular  
6  
7 385 events: the FINRISK'92 cohort. *Obesity (Silver Spring)* 2011; Apr;19(4):848-52.  
8  
9  
10  
11 386 19. Katz A, Nambi SS, Mather K, Baron AD, Follmann DA, Sullivan G, et al.  
12  
13 387 Quantitative insulin sensitivity check index: a simple, accurate method for assessing  
14  
15 388 insulin sensitivity in humans. *J Clin Endocrinol Metab* 2000; Jul;85(7):2402-10.  
16  
17  
18 389 20. Kauma H, Savolainen MJ, Rantala AO, Lilja M, Kervinen K, Reunanen A, et al.  
19  
20 390 Apolipoprotein E phenotype determines the effect of alcohol on blood pressure in  
21  
22 391 middle-aged men. *Am J Hypertens* 1998; Nov;11(11 Pt 1):1334-43.  
23  
24  
25  
26 392 21. Bessebinders K, Wielders J, van de Wiel A. Severe hypertriglyceridemia  
27  
28 393 influenced by alcohol (SHIBA). *Alcohol Alcohol* 2011; Mar-Apr;46(2):113-6.  
29  
30  
31  
32 394 22. Hamaguchi M, Kojima T, Takeda N, Nagata C, Takeda J, Sarui H, et al.  
33  
34 395 Nonalcoholic fatty liver disease is a novel predictor of cardiovascular disease. *World J*  
35  
36 396 *Gastroenterol* 2007; Mar 14;13(10):1579-84.  
37  
38  
39 397 23. Stepanova M, Younossi ZM. Independent Association Between Nonalcoholic Fatty  
40  
41 398 Liver Disease and Cardiovascular Disease in the US Population. *Clin Gastroenterol*  
42  
43 399 *Hepatol* 2012; Jun;10(6):646-50.  
44  
45  
46  
47 400 24. Dam-Larsen S, Franzmann M, Andersen IB, Christoffersen P, Jensen LB, Sorensen  
48  
49 401 TI, et al. Long term prognosis of fatty liver: risk of chronic liver disease and death. *Gut*  
50  
51 402 2004; May;53(5):750-5.  
52  
53  
54  
55  
56  
57  
58  
59  
60

- 1  
2  
3 403 **25. Lazo M, Hernaez R, Bonekamp S, Kamel IR, Brancati FL, Guallar E, et al. Non-**  
4  
5 404 **alcoholic fatty liver disease and mortality among US adults: prospective cohort study.**  
6  
7 405 ***BMJ* 2011; Nov 18;343:d6891.**  
8  
9  
10  
11 406 **26. Targher G, Bertolini L, Poli F, Rodella S, Scala L, Tessari R, et al. Nonalcoholic fatty**  
12  
13 407 **liver disease and risk of future cardiovascular events among type 2 diabetic patients.**  
14  
15 408 ***Diabetes* 2005; Dec;54(12):3541-6.**  
16  
17  
18  
19 409 **27. Ghouri N, Preiss D, Sattar N. Liver enzymes, nonalcoholic fatty liver disease, and**  
20  
21 410 **incident cardiovascular disease: a narrative review and clinical perspective of**  
22  
23 411 **prospective data. *Hepatology* 2010; Sep;52(3):1156-61.**  
24  
25  
26 412 **28. Ruttman E, Brant LJ, Concin H, Diem G, Rapp K, Ulmer H, et al. Gamma-**  
27  
28 413 **glutamyltransferase as a risk factor for cardiovascular disease mortality: an**  
29  
30 414 **epidemiological investigation in a cohort of 163,944 Austrian adults. *Circulation* 2005;**  
31  
32 415 **Oct 4;112(14):2130-7.**  
33  
34  
35  
36 416 **29. Bhatia LS, Curzen NP, Calder PC, Byrne CD. Non-alcoholic fatty liver disease: a**  
37  
38 417 **new and important cardiovascular risk factor?. *Eur Heart J* 2012; May;33(10):1190-200.**  
39  
40  
41  
42 418 **30. Beckman JA, Creager MA, Libby P. Diabetes and atherosclerosis: epidemiology,**  
43  
44 419 **pathophysiology, and management. *JAMA* 2002; May 15;287(19):2570-81.**  
45  
46  
47  
48 420 **31. Joseph P, Teo K. Optimal medical therapy, lifestyle intervention, and secondary**  
49  
50 421 **prevention strategies for cardiovascular event reduction in ischemic heart disease. *Curr***  
51  
52 422 ***Cardiol Rep* 2011; Aug;13(4):287-95.**  
53  
54  
55  
56  
57  
58  
59  
60

- 1  
2  
3 423 32. Calori G, Lattuada G, Ragogna F, Garancini MP, Crosignani P, Villa M, et al. Fatty  
4  
5 424 liver index and mortality: the Cremona study in the 15th year of follow-up. *Hepatology*  
6  
7 425 2011; Jul;54(1):145-52.  
8  
9  
10 426 33. Soderberg C, Stal P, Askling J, Glaumann H, Lindberg G, Marmur J, et al.  
11  
12 427 Decreased survival of subjects with elevated liver function tests during a 28-year follow-  
13  
14 428 up. *Hepatology* 2010; Feb;51(2):595-602.  
15  
16  
17  
18 429 34. Bhatia LS, Curzen NP, Byrne CD. Nonalcoholic fatty liver disease and vascular risk.  
19  
20 430 *Curr Opin Cardiol* 2012; Jul;27(4):420-8.  
21  
22  
23  
24 431 35. Joy D, Thava VR, Scott BB. Diagnosis of fatty liver disease: is biopsy necessary?. *Eur*  
25  
26 432 *J Gastroenterol Hepatol* 2003; May;15(5):539-43.  
27  
28  
29 433 36. Dasarathy S, Dasarathy J, Khiyami A, Joseph R, Lopez R, McCullough AJ. Validity  
30  
31 434 of real time ultrasound in the diagnosis of hepatic steatosis: a prospective study. *J*  
32  
33 435 *Hepatol* 2009; Dec;51(6):1061-7.  
34  
35  
36  
37 436  
38  
39  
40  
41  
42  
43  
44  
45  
46  
47  
48  
49  
50  
51  
52  
53  
54  
55  
56  
57  
58  
59  
60

437

| <b>Grade of liver<br/>bightness</b>         | <b>0<br/>(n=720)</b> | <b>1<br/>(n=124)</b> | <b>2<br/>(n=144)</b> | <b>p</b> | <b>p</b>     | <b>p</b>     | <b>p</b>     |
|---------------------------------------------|----------------------|----------------------|----------------------|----------|--------------|--------------|--------------|
|                                             |                      |                      |                      |          | <b>(0-1)</b> | <b>(1-2)</b> | <b>(0-2)</b> |
| <b>Age (years)</b>                          | 50.9 (6.0)           | 51.9 (6.1)           | 51.5 (5.5)           | NS       | NS           | NS           | NS           |
| <b>Males</b>                                | 44.3 %<br>(n=319)    | 65.3 %<br>(n=81)     | 59.9 %<br>(n=82)     | < 0.001  | -            | -            | -            |
| <b>Hypertensives</b>                        | 41.4 %<br>(n=298)    | 66.1 %<br>(n=82)     | 71.5 %<br>(n=103)    | < 0.001  | -            | -            | -            |
| <b>BMI (kg/m<sup>2</sup>)</b>               | 26.4 (3.9)           | 29.8 (5.0)           | 31.9 (4.9)           | < 0.001  | < 0.001      | < 0.001      | < 0.001      |
| <b>Waist circumference<br/>(cm)</b>         | 86.8 (11.9)          | 97.7 (12.0)          | 102.3<br>(11.8)      | < 0.001  | < 0.001      | < 0.01       | < 0.001      |
| <b>Smoking (pack years)</b>                 | 10.6 (13.3)          | 14.3 (14.9)          | 14.0 (14.6)          | < 0.05   | NS           | NS           | NS           |
| <b>Alcohol consumption<br/>(g/week)</b>     | 51.1 (83.0)          | 95.1<br>(117.0)      | 82.6<br>(105.1)      | < 0.01   | < 0.05       | NS           | NS           |
| <b>Total serum cholesterol<br/>(mmol/L)</b> | 5.6 (1.0)            | 5.8 (1.1)            | 5.8 (1.1)            | NS       | NS           | NS           | NS           |
| <b>LDL (mmol/L)</b>                         | 3.5 (0.9)            | 3.7 (1.1)            | 3.5 (0.9)            | NS       | NS           | NS           | NS           |
| <b>Triglycerides (mmol/L)</b>               | 1.4 (0.8)            | 1.9 (0.8)            | 2.2 (1.4)            | < 0.001  | < 0.001      | < 0.05       | < 0.001      |
| <b>Systolic blood pressure</b>              | 145.2<br>(21.5)      | 152.7<br>(20.3)      | 157.1<br>(22.2)      | < 0.001  | < 0.01       | NS           | < 0.001      |
| <b>Fasting insulin<br/>(mmol/L)</b>         | 10.8 (7.7)           | 18.2 (10.3)          | 23.8 (17.6)          | < 0.001  | < 0.001      | < 0.001      | < 0.001      |

|                                    |                    |                    |                    |         |         |         |         |
|------------------------------------|--------------------|--------------------|--------------------|---------|---------|---------|---------|
| <b>Fasting glucose</b>             | 4.4 (0.7)          | 5.0 (1.4)          | 6.1 (2.8)          | < 0.001 | < 0.001 | < 0.001 | < 0.001 |
| <b>(mmol/L)</b>                    |                    |                    |                    |         |         |         |         |
| <b>QUICKI</b>                      | 0.6 (0.1)          | 0.6 (0.1)          | 0.5 (0.1)          | < 0.001 | < 0.001 | < 0.001 | < 0.001 |
| <b>hs-CRP (ng/mL)</b>              | 3039.4<br>(6758.3) | 3981.4<br>(6068.2) | 6122.0<br>(6630.8) | < 0.001 | < 0.001 | < 0.01  | < 0.001 |
| <b>ALT U/L</b>                     | 26.2 (15.5)        | 37.8 (17.1)        | 55.4 (37.7)        | < 0.001 | < 0.001 | < 0.001 | < 0.001 |
| <b>GGT U/L</b>                     | 35.1 (33.5)        | 69.7<br>(116.3)    | 76.8 (92.4)        | < 0.001 | < 0.001 | < 0.01  | < 0.001 |
| <b>Anti-hypertensive treatment</b> | 43.6%<br>(n=314)   | 66.9%<br>(n=83)    | 72.9%<br>(n=105)   | < 0.001 | -       | -       | -       |
| <b>Lipid-lowering treatment</b>    | 2.2%<br>(n=16)     | 1.6% (n=2)         | 6.2% (n=9)         | < 0.05  | -       | -       | -       |
| <b>Hypoglycaemic drug</b>          | 1.1% (n=8)         | 1.6% (n=2)         | 10.4%<br>(n=15)    | < 0.001 | -       | -       | -       |
| <b>Type 2 diabetes</b>             | 2.4%<br>(n=17)     | 12.1%<br>(n=15)    | 36.8%<br>(n=53)    | < 0.001 | -       | -       | -       |

438

439 **Table 1.** Baseline characteristics of the study group as means (standard deviations) or  
440 percentages. N= number of subjects. ALT, alanine aminotransferase, BMI, body mass index,  
441 GGT, gamma-glutamyltransferase, hs-CRP, high-sensitivity C-reactive protein, LDL, low-  
442 density lipoprotein, QUICKI, quantitative insulin sensitivity check index.

443

|                                  | Model 1             | Model 2             | Model 3             | Model 4             | Model 5              |
|----------------------------------|---------------------|---------------------|---------------------|---------------------|----------------------|
| <b>Moderate fat accumulation</b> | 1.51 (0.99-2.29)    | 1.44 (0.93-2.23)    | 1.31 (0.84-2.05)    | 1.30 (0.84-2.01)    | 1.49 (0.99-2.26)     |
| <b>Severe fat accumulation</b>   | 1.92 (1.32-2.80)**  | 1.74 (1.16-2.63) ** | 1.49 (0.97-2.30)    | 1.43 (0.93-2.18)    | 1.76 (1.21- 2.56) ** |
| <b>Study group</b>               | 1.34 (0.98-1.85)    | 1.29 (0.92-1.80)    | 1.28 (0.92-1.78)    |                     |                      |
| <b>Age</b>                       | 1.06 (1.03-1.09)*** | 1.05(1.02-1.08)**   | 1.05 (1.02-1.08)**  | 1.05 (1.02-1.07)**  | 1.05 (1.02-1.08) **  |
| <b>Gender</b>                    | 2.39 (1.71-3.34)*   | 1.91 (1.34-2.71)*** | 1.80 (1.26-2.57)**  | 1.83 (1.29-2.60) ** | 1.92 (1.36-2.72) *** |
| <b>LDL-cholesterol</b>           |                     | 1.17 (0.99-1.39)    | 1.15 (0.97-1.37)    |                     |                      |
| <b>Smoking (pack-years)</b>      |                     | 1.02 (1.01-1.03)*** | 1.02 (1.01-1.03)*** | 1.02 (1.01-1.03)*** | 1.02 (1.01-1.03) *** |
| <b>Alcohol consumption (gr1)</b> |                     | 0.93 (0.59-1.45)    | 0.92(0.59-1.44)     |                     |                      |
| <b>Alcohol consumption (gr2)</b> |                     | 0.84 (0.44-1.60)    | 0.81(0.42-1.54)     |                     |                      |
| <b>Systolic blood pressure</b>   |                     | 1.01 (1.00-1.02)**  | 1.01 (1.00-1.02)*   | 1.01 (1.00-1.02)**  | 1.01 (1.00-1.02) **  |
| <b>Body mass index</b>           |                     | 0.99 (0.96-1.03)    | 0.97 (0.93-1.01)    |                     |                      |
| <b>QUICKI</b>                    |                     |                     | 0.12 (0.02-0.90)*   | 0.16 (0.03-0.99)*   |                      |

444

445



1  
2  
3 446 **Table 2.** Multivariate analysis for cardiovascular events with different degrees of adjustments  
4  
5 447 (Cox regression analysis). CVD event occurred in 13.5% of the subjects with no fat in the  
6  
7 448 liver (97/720), 24.2% (30/124) of subjects having moderate liver fat accumulation and 29.2%  
8  
9 449 (42/144) of the subjects having severe fatty liver. Hazard ratios with 95% confidence interval  
10  
11 450 with different degrees of adjustments are presented. Alcohol consumption was divided into  
12  
13 451 groups (reference group: less than 1g/week in men and women, group 1: less than 210g/week  
14  
15 452 in men and less than 140 g/week in women, group 2: more than 210g/week in men and more  
16  
17 453 than 140g/week in women). Model 1: adjustment for study group, age and gender. Model 2:  
18  
19 454 further adjustments for LDL-cholesterol, smoking, alcohol consumption, systolic blood  
20  
21 455 pressure and body mass index. Model 3: further adjustment for QUICKI. Model 4:  
22  
23 456 adjustments with statistically significant covariates. Model 5: adjustments with statistically  
24  
25 457 significant covariates without QUICKI. LDL, low-density lipoprotein, QUICKI, quantitative  
26  
27 458 insulin sensitivity check index. \*\*\*  $p < 0.001$ , \*\*  $p < 0.01$ , \*  $p < 0.05$ .  
28  
29  
30  
31  
32  
33  
34  
35  
36  
37  
38  
39  
40  
41  
42  
43  
44  
45  
46  
47  
48  
49  
50  
51  
52  
53  
54  
55  
56  
57  
58  
59  
60

| Final model    | Cardiovascular event<br>c-index (95% CI) | Binary R <sup>2</sup> |     |
|----------------|------------------------------------------|-----------------------|-----|
|                |                                          |                       | 467 |
|                |                                          |                       | 468 |
|                |                                          |                       | 469 |
| <b>Model 3</b> | 0.729 (0.706-0.776)                      | 0.153                 | 470 |
| <b>Model 4</b> | 0.720 (0.689-0.763)                      | 0.144                 | 471 |
|                |                                          |                       | 472 |
| <b>Model 5</b> | 0.717 (0.686-0.758)                      | 0.138                 | 473 |
|                |                                          |                       | 474 |
| <b>Model 1</b> | 0.698 (0.656-0.742)                      | 0.133                 |     |

**Table 3.** Multivariate analysis for cardiovascular events (logistic regression analysis). Cardiovascular disease risk factors have been removed from the models step by step. Model 3 included liver brightness, study group, age, gender, smoking, alcohol consumption, systolic blood pressure, LDL-cholesterol level, body mass index and QUICKI. Model 4 included liver brightness, age, gender, smoking, blood pressure and QUICKI. Model 5 included liver brightness, age, gender, smoking, blood pressure. Model 1 included liver brightness, study group, age and gender. C-index with confidence intervals obtained from 250 bootstrap resamplings and binary R<sup>2</sup> was used. LDL, low-density lipoprotein, QUICKI, quantitative insulin sensitivity check index.

1  
2  
3 484 **Contributor statement:** All authors fulfill all three of the ICMJE guidelines for authorship  
4  
5

6 485 **Pauliina Pisto:** Data acquisition, statistical analysis and interpretation of data, manuscript  
7  
8 486 writing, final approval of the version to be published  
9  
10

11 487 **Merja Santaniemi:** Data acquisition, statistical analysis and data interpretation, critical  
12  
13 488 revision of the manuscript, final approval of the version to be published  
14  
15

16  
17 489 **Risto Bloigu:** Data analysis, interpretation of data, critical revision of the manuscript, final  
18  
19 490 approval of the version to be published  
20  
21

22  
23 491 **Olavi Ukkola:** Study design, data acquisition, data interpretation, critical revision of the  
24  
25 492 manuscript, final approval of the version to be published  
26  
27

28 493 **Y.A Kesäniemi:** Study design, data acquisition, data interpretation, critical revision of the  
29  
30 494 manuscript, final approval of the version to be published  
31  
32

33  
34 495  
35  
36

37 496 **Data sharing statement:** Extra data is available by emailing pauliina.pisto(at)oulu.fi  
38  
39  
40  
41  
42  
43  
44  
45  
46  
47  
48  
49  
50  
51  
52  
53  
54  
55  
56  
57  
58  
59  
60

1  
2  
3  
4  
5  
6  
7  
8  
9  
10  
11  
12  
13  
14  
15  
16  
17  
18  
19  
20  
21  
22  
23  
24  
25  
26  
27  
28  
29  
30  
31  
32  
33  
34  
35  
36  
37  
38  
39  
40  
41  
42  
43  
44  
45  
46  
47  
48  
49  
50  
51  
52  
53  
54  
55  
56  
57  
58  
59  
60

497

For peer review only

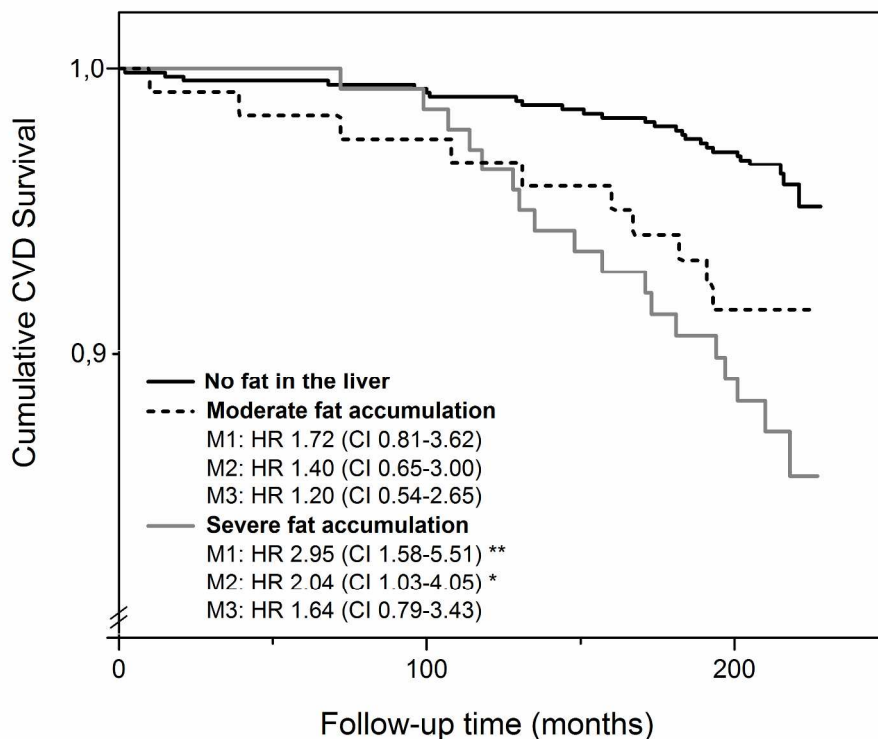

Kaplan Meier cumulative survival rates censored for cardiovascular death in subjects with no fat in the liver, moderate fat accumulation and severe fat accumulation.

CVD was the cause of death in 3.6% of the subjects (26/720) with non-fatty liver and 8.1% of the subjects (10/124) with moderate liver fat accumulation, while 12.5% of the subjects with severe fatty liver (18/144).

Cox regression analysis is used for adjustments. M1 (Model 1): adjusted for study group, age and gender.

M2 (Model 2): further adjustments for smoking, alcohol consumption, systolic blood pressure, LDL-cholesterol level and body mass index. M3 (Model 3): further adjustment for QUICKI. CVD, cardiovascular disease, CI, confidence interval, HR, hazard ratio, QUICKI, quantitative insulin sensitivity check index. \*\* p < 0.01, \* p < 0.05.

247x209mm (300 x 300 DPI)

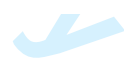

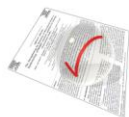

## STROBE Statement

Strengthening the reporting of observational studies in epidemiology

### STROBE Statement—Items to be included when reporting observational studies in a conference abstract

| Item                | Recommendation                                                                                                                                                                                                                              |
|---------------------|---------------------------------------------------------------------------------------------------------------------------------------------------------------------------------------------------------------------------------------------|
| Title               | Indicate the study's design with a commonly used term in the title (e.g cohort, case-control, cross sectional)                                                                                                                              |
| Authors             | Contact details for the corresponding author                                                                                                                                                                                                |
| Study design        | Description of the study design (e.g cohort, case-control, cross sectional)                                                                                                                                                                 |
| Objective           | Specific objectives or hypothesis                                                                                                                                                                                                           |
| <b>Methods</b>      |                                                                                                                                                                                                                                             |
| Setting             | Description of setting, follow-up dates or dates at which the outcome events occurred or at which the outcomes were present, as well as any points or ranges on other time scales for the outcomes (e.g., prevalence at age 18, 1998-2007). |
| Participants        | <i>Cohort study</i> —Give the most important eligibility criteria, and the most important sources and methods of selection of participants. Describe briefly the methods of follow-up                                                       |
|                     | <i>Case-control study</i> —Give the major eligibility criteria, and the major sources and methods of case ascertainment and control selection                                                                                               |
|                     | <i>Cross-sectional study</i> —Give the eligibility criteria, and the major sources and methods of selection of participants                                                                                                                 |
|                     | <i>Cohort study</i> —For matched studies, give matching and number of exposed and unexposed                                                                                                                                                 |
|                     | <i>Case-control study</i> —For matched studies, give matching criteria and the number of controls per case                                                                                                                                  |
| Variables           | Clearly define primary outcome for this report.                                                                                                                                                                                             |
| Statistical methods | Describe statistical methods, including those used to control for confounding                                                                                                                                                               |
| <b>Results</b>      |                                                                                                                                                                                                                                             |
| Participants        | Report Number of participants at the beginning and end of the study                                                                                                                                                                         |
| Main results        | Report estimates of associations. If relevant, consider translating estimates of relative risk into absolute risk for a meaningful time period                                                                                              |
|                     | Report appropriate measures of variability and uncertainty (e.g., odds ratios with confidence intervals)                                                                                                                                    |
| Conclusions         | General interpretation of study results                                                                                                                                                                                                     |



**Fatty liver predicts the risk for cardiovascular events in middle-aged population: a population-based cohort study**

|                                 |                                                                                                                                                                                                                                                                                                                                                                                                                  |
|---------------------------------|------------------------------------------------------------------------------------------------------------------------------------------------------------------------------------------------------------------------------------------------------------------------------------------------------------------------------------------------------------------------------------------------------------------|
| Journal:                        | <i>BMJ Open</i>                                                                                                                                                                                                                                                                                                                                                                                                  |
| Manuscript ID:                  | bmjopen-2013-003202.R1                                                                                                                                                                                                                                                                                                                                                                                           |
| Article Type:                   | Research                                                                                                                                                                                                                                                                                                                                                                                                         |
| Date Submitted by the Author:   | 12-Aug-2013                                                                                                                                                                                                                                                                                                                                                                                                      |
| Complete List of Authors:       | Pisto, Pauliina; Institute of Clinical Medicine, Department of Internal Medicine<br>Santaniemi, Merja; Institute of Clinical Medicine, Department of Internal Medicine<br>Bloigu, Risto; Medical Informatics and Statistics Research Group, Ukkola, Olavi; Institute of Clinical Medicine, Department of Internal Medicine<br>Kesäniemi, Antero; Institute of Clinical Medicine, Department of Internal Medicine |
| <b>Primary Subject Heading</b>: | Cardiovascular medicine                                                                                                                                                                                                                                                                                                                                                                                          |
| Secondary Subject Heading:      | Cardiovascular medicine, Diabetes and endocrinology                                                                                                                                                                                                                                                                                                                                                              |
| Keywords:                       | Coronary heart disease < CARDIOLOGY, Myocardial infarction < CARDIOLOGY, General diabetes < DIABETES & ENDOCRINOLOGY, Hepatology < INTERNAL MEDICINE                                                                                                                                                                                                                                                             |
|                                 |                                                                                                                                                                                                                                                                                                                                                                                                                  |

SCHOLARONE™  
Manuscripts

only

1  
2  
3  
4 1 **Fatty liver predicts the risk for cardiovascular events in middle-aged population: a**  
5  
6 2 **population-based cohort study**  
7  
8

9 3 Pauliina Pisto<sup>1</sup>, Merja Santaniemi<sup>1</sup>, Risto Bloigu<sup>2</sup>, Olavi Ukkola<sup>1</sup>, Y. Antero Kesäniemi<sup>1</sup>  
10  
11

12 4 <sup>1</sup>Institute of Clinical Medicine, Department of Internal Medicine and Biocenter Oulu,  
13 5 University of Oulu, and Clinical Research Center, Oulu University Hospital, Oulu, Finland,  
14 6 P.O. Box 20, 90029 OYS, Finland  
15  
16

17 7 <sup>2</sup>Medical Informatics and Statistics Research Group, University of Oulu, Aapistie 7, P.O. Box  
18 8 5000, 90014 Oulu, Finland  
19  
20  
21  
22  
23  
24

25 9 **Contact information:** Pauliina Pisto, corresponding author  
26  
27

28 10 University of Oulu  
29  
30

31 11 Institute of Clinical Medicine  
32  
33

34 12 Department of Internal medicine  
35  
36

37 13 P.O. Box 5000, 90014 Oulu, Finland  
38  
39

40 14 Tel.: +35885376310  
41  
42

43 15 Fax: +35885376318  
44  
45

46 16 E-mail: pauliina.pisto@oulu.fi  
47  
48  
49

50 17 **Word count:** 5093  
51  
52

53 18 **Keywords:** coronary disease, fatty liver, insulin resistance, risk factors, stroke  
54

55 19 **Financial support:** This study was supported by the Finnish Foundation for Cardiovascular  
56 20 Research, dated 16 Apr, 2012.  
57  
58  
59  
60



1  
2  
3 21 **Disclosure summary:** Authors report no conflict of interests.  
4  
5  
6 22

7 23 **ABSTRACT**  
8

9  
10 24 **Objective:** We investigated if the differences in liver fat content would predict the  
11  
12 25 development of non-fatal and fatal atherosclerotic endpoints (coronary heart disease and  
13  
14 26 stroke).  
15

16 27 **Design, setting and participants:** Our study group is a population-based, randomly recruited  
17  
18 28 cohort (OPERA), initiated in 1991. The cohort consisted of 988 middle-aged Finnish subjects.  
19

20 29 **Intervention:** Total mortality and hospital events were followed up to 2009 based on the  
21  
22 30 registry of the National Institute for Health and Welfare and the National death registry.  
23

24 31 **Main outcome measure:** The severity of hepatic steatosis was measured by ultrasound and  
25  
26 32 divided into three groups (0-2). Cox regression analysis was used in the statistical analysis.  
27  
28

29 33 **Results:** In the follow-up of years 1991-2009, 13.5% of the subjects with non-fatty liver,  
30  
31 34 24.2% of subjects having moderate liver fat content and 29.2% of the subjects having severe  
32  
33 35 fatty liver experienced a cardiovascular event during the follow-up time ( $p < 0.001$ ). Severe  
34  
35 36 liver fat content predicted the risk for future risk of cardiovascular event even when adjusted  
36  
37 37 for age, gender and study group (HR 1.92, CI 1.32-2.80,  $p < 0.01$ ). When further adjustments  
38  
39 40 for smoking, alcohol consumption, LDL-cholesterol, BMI and systolic blood pressure were  
40  
41 41 conducted, the risk still remained statistically significant (HR 1.74, CI 1.16-2.63,  $p < 0.01$ ).  
42  
43 42 Statistical significance disappeared with further adjustment for QUICKI.  
44  
45

46 47 **Conclusions:** Liver fat content increases the risk of future cardiovascular disease event in  
47  
48 48 long-term follow-up but it seems to be dependent on insulin sensitivity.  
49  
50 49  
51  
52 43  
53  
54 44  
55  
56 45  
57  
58  
59  
60

1  
2  
3 46 **Article focus**  
4  
5

6 47 1 To investigate if the differences in liver fat content predict the risk for development of fatal  
7  
8 48 or nonfatal atherosclerotic endpoints such as coronary heart disease and stroke.  
9  
10

11 49  
12  
13  
14 50 **Key messages**  
15  
16

17  
18 51 1 Subjects with ultrasound-diagnosed fatty liver have cardiovascular disease more often  
19  
20 52 compared to the subjects without fat in the liver  
21  
22

23 53 2 Severe liver fat content increases the risk of a future cardiovascular event and mortality to  
24  
25 54 cardiovascular disease over the long-term follow-up but it does seem to be dependent on  
26  
27 55 insulin sensitivity  
28  
29

30  
31 56 3 Severe fatty liver predicts the risk for overall mortality but the association is dependent on  
32  
33 57 traditional metabolic risk factors  
34  
35

36 58 **Strengths and limitations of the study**  
37  
38

39 59 1 This is a follow-up study with a large population-based study group and a very long follow-  
40  
41 60 up time  
42  
43

44  
45 61 2 Official registers used in event diagnoses - data is accurate and the classification is  
46  
47 62 systematic  
48  
49

50 63 3 Grade of liver brightness was measured by ultrasound, which has a high specificity but low  
51  
52 64 sensitivity  
53  
54

55 65

56  
57 66 **Introduction**  
58  
59  
60

1  
2  
3 67 Non-alcoholic fatty liver disease (NAFLD) refers to liver disorders such as abnormal fat  
4  
5 68 content, which exists in a spectrum ranging from steatosis with no inflammation to non-  
6  
7 69 alcoholic steatohepatitis (NASH), which can ultimately lead to liver cirrhosis <sup>1</sup>. The  
8  
9 70 prevalence of NAFLD is estimated to range from 20 to 30% of population in Western  
10  
11 71 countries, being the leading cause of liver disorders <sup>2,3</sup>. It is associated with obesity, type 2  
12  
13 72 diabetes mellitus (T2DM) and hyperlipidemia <sup>1</sup>. NAFLD is commonly regarded as a hepatic  
14  
15 73 manifestation of the metabolic syndrome and both conditions share several risk factors for  
16  
17 74 cardiovascular disease (CVD) <sup>3,4</sup>.  
18  
19  
20  
21  
22  
23  
24

25 76 In 2008, the prevalence of CVD in adults ( $\geq 20$  years) in United States was 36.2% <sup>5</sup>. Every  
26  
27 77 year, 4.3 million subjects die for CVD in Europe causing nearly half of the all deaths (48%) <sup>6</sup>.  
28  
29 78 So-called traditional risk factors for cardiovascular disease are age, gender, smoking, high  
30  
31 79 low-density lipoprotein (LDL) cholesterol concentration, hypertension and diabetes <sup>7</sup>. In  
32  
33 80 addition, total body fatness as well as abdominal fat accumulation increase independently the  
34  
35 81 risk of CVD and insulin resistance is regarded to be an important factor linking visceral  
36  
37 82 adiposity to cardiovascular risk <sup>8</sup>. Adipose tissue is now recognized as a significant endocrine  
38  
39 83 organ as adipocytes and macrophages infiltrating adipocytes secrete a number of bioactive  
40  
41 84 mediators <sup>7</sup>. Adipokines, proinflammatory cytokines and hypofibrinolytic markers may lead to  
42  
43 85 oxidative stress and endothelial dysfunction, finally leading to atherosclerosis <sup>9</sup>.  
44  
45  
46  
47  
48  
49  
50

51 87 Hepatic steatosis has been discussed as a possible mechanism to explain CVD morbidity and  
52  
53 88 mortality <sup>10</sup>. NAFLD patients have been reported to have higher coronary heart disease (CHD)  
54  
55 89 risk than the general population of the same age and gender <sup>11</sup>. According to previous study,  
56  
57  
58  
59  
60

1  
2  
3 90 liver dysfunction associated with CVD mortality in men<sup>12</sup> whereas another large study found  
4  
5 91 no association between NAFLD and CVD in general population<sup>13</sup>. In addition, fatty liver did  
6  
7 92 not predict CVD mortality and morbidity in patients with established coronary artery disease  
8  
9 93<sup>14</sup>.

10  
11  
12  
13 94

14  
15  
16 95 The NAFLD and CVD share several molecular mechanisms<sup>15,16</sup>. Fatty liver might play a part  
17  
18 96 in the pathogenesis of CVD through the overexpression and systemic release of several  
19  
20 97 inflammatory, hemostatic<sup>17</sup> and oxidative-stress mediators or via contributing to whole-body  
21  
22 98 insulin resistance and atherogenic dyslipidemia<sup>3</sup>. NAFLD has also been reported to be linked  
23  
24 99 with circulatory endothelial dysfunction<sup>4,14</sup>. Several investigators have reported that NAFLD  
25  
26 100 is associated with coronary artery disease<sup>4,14</sup> and increased carotid intima-media thickness<sup>18</sup>,  
27  
28 101<sup>19</sup>. Increased gamma-glutamyltransferase (GGT), which may be a marker of NAFLD, has  
29  
30 102 been reported to be associated with stroke<sup>20</sup>.

31  
32  
33  
34  
35 103

36  
37  
38 104 It is known that subjects with fatty liver disease have an increased risk of suffering CVD<sup>4</sup>, but  
39  
40 105 whether NAFLD is an independent indicator of cardiovascular disease is still far from clear.  
41  
42 106 Long-term follow-up studies are needed to clarify the correlation between fatty liver and  
43  
44 107 CVD. The aim of our study was to investigate if fatty liver could predict independently the  
45  
46 108 risk for total mortality as well as non-fatal and fatal cardiovascular endpoints with a 19-year  
47  
48 109 follow-up after adjusting for all known conventional risk factors.

49  
50  
51  
52 110

53  
54  
55  
56 111 **Materials and methods**

1  
2  
3 112 **Human subjects**  
4  
5

6 113 OPERA (Oulu Project Elucidating Risk of Atherosclerosis) is a population-based,  
7  
8 114 epidemiological prospective cohort study designed to address the risk factors and disease end  
9  
10 115 points of atherosclerotic cardiovascular diseases. Selection criteria of the study subjects have  
11  
12 116 been described earlier <sup>21</sup>. In short, a total of 520 men and 525 women participated: 259 control  
13  
14 117 men, 261 hypertensive men, 267 control women and 258 hypertensive women aged 40-59.  
15  
16 118 Hypertensive participants were randomly selected from the national register for  
17  
18 119 reimbursement of the costs of antihypertensive medication. For each hypertensive subject, an  
19  
20 120 age- and sex-matched control subject was randomly selected from the same register. Informed  
21  
22 121 consent in writing was obtained from each patient. The study protocol conformed to the  
23  
24 122 ethical guidelines of the 1975 Declaration of Helsinki and this study was approved by the  
25  
26 123 Ethical Committee of the Faculty of Medicine, University of Oulu.  
27  
28  
29  
30  
31  
32  
33  
34

35 125 **Determination of hepatic steatosis**  
36  
37

38 126 The determination of hepatic steatosis was based on liver-kidney contrast measured with  
39  
40 127 ultrasonography <sup>22</sup> by one trained radiologist with 10 years' experience in abdominal  
41  
42 128 ultrasound examinations. The severity of hepatic steatosis was based on the brightness of the  
43  
44 129 liver and it was classified into three groups ranging from 0 to 2 (0 = normal bright, indicating  
45  
46 130 a non-fatty liver, 1 = medium bright, a moderate lipid content and 2 = clearly bright, a severe  
47  
48 131 lipid content and fatty liver) <sup>23</sup>.  
49  
50  
51  
52  
53  
54

55 133 **Follow-up**  
56  
57  
58  
59  
60

1  
2  
3 134 Both the hypertensive and the control men were recruited during December 1990 to May  
4  
5 135 1992 and the women approximately one year later (n=1045). In total, 1023 subjects had a  
6  
7 136 liver ultrasound result available at baseline. Mortality data were obtained from the National  
8  
9 137 Death Registry and the diagnoses of cardiovascular events were based on the registry of the  
10  
11 138 National Institute for Health and Welfare. The follow-up time ended December 31, 2009 or  
12  
13 139 whenever the first event occurred. Cardiovascular events included fatal and non-fatal  
14  
15 140 endpoints. Subjects with a previous hospital-diagnosed myocardial infarction or stroke (n=41)  
16  
17 141 at baseline were excluded. In total, 988 subjects participated in this part of the study.  
18  
19  
20  
21  
22  
23

24  
25 143 CVD included a major CHD event and stroke (excluding subarachnoid hemorrhage, SAH) -  
26  
27 144 whichever of these happened first <sup>24</sup>. The evidence of CHD was based on the following  
28  
29 145 diagnosis: I20.0, I21, I22 [ICD-10, International Statistical Classification of Diseases and  
30  
31 146 Related Health Problems] / 410, 4110 [ICD-8/9] as the main diagnosis (symptom or cause)  
32  
33 147 and I21, I22 [ICD-10] / 410 [ICD-8/9] as a first side diagnosis (symptom or cause) or second  
34  
35 148 side diagnosis (symptom or cause) and third side diagnosis (ICD-8/9 only) or if a subject had  
36  
37 149 undergone coronary artery bypass graft (CABG) surgery or angioplasty. CHD as a cause of  
38  
39 150 death included I20–I25, I46, R96, R98 [ICD-10] / 410-414, 798 (not 7980A) [ICD-8/9] as the  
40  
41 151 underlying cause of death or immediate cause of death and I21 or I22 [ICD-10] / 410 [ICD-  
42  
43 152 8/9] as first to third contributing cause of death. Stroke (excluding SAH) included I61, I63  
44  
45 153 (not I636), I64 [ICD -10] / 431, 4330A, 4331A, 4339A, 4340A, 4341A, 4349A, 436 [ICD-9] /  
46  
47 154 431 (except 43101, 43191) 433, 434, 436 [ICD-8] as main diagnosis (symptom or cause) or as  
48  
49 155 a first or second side diagnosis (symptom or cause) or as a third side diagnosis (ICD-8/9 only)  
50  
51 156 or as an underlying cause of death or immediate cause of death or as a first to third  
52  
53 157 contributing cause of death <sup>25</sup>.  
54  
55  
56  
57  
58  
59  
60

1  
2  
3 158  
4  
5

6 159 **Laboratory analyses**  
7

8  
9 160 Waist circumference, body mass index (BMI) and blood pressure were measured as described  
10  
11 161 in previous study <sup>21</sup>.  
12

13  
14  
15 162

16  
17  
18 163 All the laboratory test samples were obtained after an overnight fast. Blood insulin and  
19  
20 164 glucose concentrations were analyzed at 0, 60, and 120 min after administration of 75 g  
21  
22 165 glucose <sup>23</sup>. Insulin sensitivity was assessed using fasting plasma insulin concentrations and a  
23  
24 166 quantitative insulin sensitivity check index (QUICKI) {QUICKI=1/[log (fasting insulin)+log  
25  
26 167 (fasting glucose)]} <sup>26</sup>.  
27  
28

29  
30 168

31  
32  
33 169 Very-low-density lipoprotein (VLDL), high-density lipoprotein (HDL), low-density  
34  
35 170 lipoprotein (LDL) and hs-CRP concentrations <sup>23</sup> as well as alanine aminotransferase (ALT)  
36  
37 171 and GGT levels were measured as described previously <sup>22</sup>. Alcohol consumption and smoking  
38  
39 172 history were determined by validated questionnaires <sup>27</sup>. Alcohol consumption was divided into  
40  
41 173 three groups: 0 (n=161) mean alcohol consumption less than 1g/week in men and women, 1  
42  
43 174 (n=767) mean consumption less than 210g/week in men and less than 140 g/week in women,  
44  
45 175 2 (n=76) mean alcohol consumption more than 210g/week in men and more than 140g/week  
46  
47 176 in women. Group 2 designates large-scale alcohol consumers according to the guidelines <sup>28</sup>.  
48  
49

50  
51  
52 177

53  
54  
55 178 **Statistical analysis**  
56  
57  
58  
59  
60

1  
2  
3 179 Statistical analysis was performed by using IBM SPSS Statistics for Windows, Version 20.0  
4  
5 180 (Armonk, NY: IBM Corp.). Analysis of variance was used to compare the means of the  
6  
7 181 variables measured. Post hoc tests were performed using the Tukey method. Statistical  
8  
9 182 significances between percentages were measured by using  $\chi^2$  test. Cumulative survival rates  
10  
11 183 were estimated using Kaplan-Meier method. Cox regression analysis was performed to  
12  
13 184 investigate if liver brightness (fat) could predict the future risk for total mortality,  
14  
15 185 cardiovascular death or hospital events. A p value < 0.05 was regarded as significant.  
16  
17  
18  
19

20 186

21  
22 187 Skewed variables (smoking, alcohol consumption, fasting insulin, fasting glucose,  
23  
24 188 triglyceride, ALT, GGT concentration, hs-CRP level) were logarithmically transformed to  
25  
26 189 improve normality before analysis of variance. We used three models with progressive  
27  
28 190 degrees of adjustments. Model 1 included study group (subjects with medicine-treated  
29  
30 191 hypertension and their age- and sex-matched controls), age and gender. Model 2 included  
31  
32 192 further adjustments for smoking, alcohol consumption, systolic blood pressure, LDL-  
33  
34 193 cholesterol level and body mass index. Model 3 included further adjustment for QUICKI. We  
35  
36 194 carried out sensitivity analyses: in the analyses of cardiovascular events, we added all  
37  
38 195 covariates one by one and investigated if the hazard ratios (HR) changed or remained stable  
39  
40 196 when further adjustment with one covariate was performed. Model 4 included variables which  
41  
42 197 were stable and were statistically significant in intermediate phases. Model 5 included stable  
43  
44 198 and significant covariates without QUICKI (Table 2).  
45  
46  
47  
48  
49

50 199

51  
52  
53 200 C-index was calculated for the model 1, model 3, model 4 and model 5 to assess the  
54  
55 201 discrimination of the risk markers. The analyses were performed in 250 bootstrap resamplings  
56  
57 202 to obtain 95% CI for c-index of each model.  
58  
59  
60



1  
2  
3 203  
4  
5

6 204 **Results**  
7

8  
9 205 The main baseline characteristics of the study group are shown in Table 1.  
10  
11

12 206  
13

14  
15  
16 207 *Table 1 about here*  
17

18 208  
19

20  
21  
22 209 **Incidence of cardiovascular disease**  
23

24  
25 210 The median follow-up time was 212 (maximum 228) months. During the follow-up time,  
26  
27 211 13.5% of the subjects with no fat in the liver (97/720), 24.2% (30/124) of subjects having  
28  
29 212 moderate liver fat content and 29.2% (42/144) of the subjects having severe fatty liver  
30  
31 213 experienced a CVD event ( $p < 0.001$ ). CVD was the cause of death in 3.6% of the subjects  
32  
33 214 with non-fatty liver (26/720) and 8.1% of the subjects with moderate liver fat content  
34  
35 215 (10/124), while 12.5% (18/144) of the subjects with severe fatty liver ( $p < 0.001$ ).  
36  
37  
38

39 216  
40  
41

42  
43 217 Severe liver fat content predicted the risk for future risk of cardiovascular event when  
44  
45 218 adjusted for age, gender and study group (Model 1: HR 1.92, CI 1.32-2.80,  $p < 0.01$ ) (Table  
46  
47 219 2). When further adjustments were made for smoking, alcohol consumption, LDL-cholesterol,  
48  
49 220 BMI and systolic blood pressure (Model 2: HR 1.74, CI 1.16-2.63), the risk still remained  
50  
51 221 statistically significant ( $p < 0.01$ ). Statistical significance disappeared when further  
52  
53 222 adjustment for QUICKI was performed (Model 3: HR 1.49, CI 0.97-2.30,  $p=0.071$ ). In the  
54  
55 223 CVD event sensitivity analyses, all covariates were added one by one and it was examined  
56  
57  
58  
59  
60

1  
2  
3 224 whether the hazard ratios would change or remain stable. After adjusting for the statistically  
4  
5 225 significant variables (including quick index) in the sensitivity analyses, the association  
6  
7 226 between severe fatty liver was no longer significant (Model 4: HR 1.43, CI 0.93-2.18,  
8  
9 227  $p=0.10$ ). When QUICKI was not added into Model 5, severe fatty liver did predict the risk for  
10  
11 228 future risk for CVD event (HR 1.76, CI 1.21- 2.56,  $p < 0.001$ ) (Table 2). The c-index  
12  
13  
14 229 decreased when the risk factors were removed from the model (Table 3).

15  
16  
17 230

18  
19  
20 231 *Tables 2 and 3 about here*

21  
22  
23 232

24  
25  
26  
27 233 The future risk of death from CVD in participants with severe fat content was significant  
28  
29 234 when age, gender and study group were added as covariates (Model 1: HR 2.95, CI 1.58-5.51,  
30  
31 235  $p < 0.01$ ). Even after further adjustments with other conventional risk factors (Model 2: HR  
32  
33 236 2.04, CI 1.03-4.05), statistical significance remained ( $p < 0.05$ ). When QUICKI was added as  
34  
35 237 the covariate, then significance disappeared (Model 3: HR 1.64, CI 0.79-3.43, NS) (Fig 1.).

36  
37  
38 238

39  
40  
41  
42 239 *Figure 1 about here*

43  
44  
45 240

#### 46 47 48 241 **Fatty liver and total mortality**

49  
50  
51 242 In total, 11.9% of the participants not having fatty liver, 18.5% of the subjects having  
52  
53 243 moderate fatty liver and 22.2% of the subjects with severe fatty liver died from all causes ( $p <$   
54  
55 244  $0.01$ ). According to Model 1, severe fat content predicted the risk for mortality from all  
56  
57  
58  
59  
60

1  
2  
3 245 causes when age, gender and study group were added as covariates (HR 1.60, CI 1.05-2.43, p  
4  
5 246 < 0.05). The significance disappeared when body mass index was added as a covariate (data  
6  
7 247 not shown).  
8  
9

10 248

11  
12  
13 249 We performed all Cox regression analyses after excluding the men consuming more than 210  
14  
15 250 g alcohol and the women drinking more than 140 g alcohol per week. This exclusion did not  
16  
17 251 have any effect on the results (data not shown).  
18  
19

20  
21 252 We performed all Cox regression analyses after excluding patients with insulin treated  
22  
23 253 diabetes mellitus (n=9), cortisone treatment at baseline (n=41) and previous diagnosis for  
24  
25 254 liver disease (n=15) (e.g., virus, medications). This exclusion did not have any effect on the  
26  
27 255 results (data not shown).  
28  
29

## 30 256 **Discussion**

31  
32  
33  
34 257 The incidences of non-alcoholic fatty liver disease and cardiovascular disease are  
35  
36 258 continuously increasing in the Western world. The question if NAFLD is only a marker or  
37  
38 259 also an early mediator of cardiovascular disease is still largely unanswered. According to the  
39  
40 260 results of the present study, which had an approximately 19-year follow-up fatty liver does  
41  
42 261 predict the future risk for death from all causes, death from cardiovascular disease and risk of  
43  
44 262 cardiovascular events. Insulin sensitivity seems to play a more dominant role in the  
45  
46 263 development of cardiovascular events.  
47  
48

49  
50 264

51  
52  
53 265 Only a few studies have investigated the risk for future cardiovascular risk among subjects  
54  
55 266 with ultrasound-diagnosed fatty liver<sup>29, 30</sup> and larger studies with longer follow-up times are  
56  
57 267 needed. An association between NAFLD and CVD has been reported<sup>3, 29-31</sup> although contrary  
58  
59  
60

1  
2  
3 268 results also exist <sup>13, 32</sup>. An association between ultrasound-diagnosed fatty liver and CVD has  
4  
5 269 been reported in general population <sup>29</sup> and in subjects with T2DM <sup>31</sup>. Furthermore, liver  
6  
7 270 dysfunction has been reported to associate with CVD mortality <sup>33, 34</sup> and CHD risk <sup>11</sup> in  
8  
9  
10 271 follow-up studies and especially survival of subjects with NASH is reported to be reduced <sup>32,</sup>  
11  
12 272 <sup>35, 36</sup>. In the present study, severe fatty liver disease did predict the risk for cardiovascular  
13  
14 273 death but the association seemed to be dependent on insulin sensitivity.

15  
16  
17 274

18  
19 275 Several earlier studies have used self-reported CVD history which may not be totally reliable.  
20  
21 276 Although earlier studies on the risk for future cardiovascular risk among subjects with fatty  
22  
23 277 liver have performed some adjustments, the full range of well-known CVD risk factors have  
24  
25 278 been rarely considered <sup>32</sup>. We have performed adjustments with all so-called traditional risk  
26  
27 279 factors for cardiovascular disease (i.e. age, gender, smoking, LDL concentration,  
28  
29 280 hypertension, insulin resistance). Previous studies have used biochemical, radiological and  
30  
31 281 histological methodology for NAFLD diagnosis and staging, which leads to a challenging  
32  
33 282 interpretation of the results <sup>34, 37</sup>.

34  
35  
36  
37 283

38  
39  
40 284 This study had an approximately 19-year follow-up time, which is longer than in previous  
41  
42 285 studies <sup>11-14</sup>. When compared to earlier studies <sup>32, 37</sup> this study seems to be the first follow-up  
43  
44 286 study with a large population-based randomly selected study group and a very long follow-up  
45  
46 287 time and ultrasound-diagnosed fatty liver. The diagnosis of cardiovascular events was based  
47  
48 288 on the registry of the National Institute for Health and Welfare and mortality data were  
49  
50 289 obtained from the National Death Registry. The earlier verified FINRISK classification <sup>25</sup> was  
51  
52 290 used to classify the events. Therefore, the reliability of event diagnosis data is accurate and  
53  
54 291 the classification is systematic. All subjects who had myocardial infarction or stroke before  
55  
56  
57  
58  
59  
60

1  
2  
3 292 baseline were excluded because a history of myocardial infarction is known to increase the  
4  
5 293 risk for recurrent myocardial infarction or cardiovascular death<sup>38</sup> and medication as well as  
6  
7 294 lifestyle secondary prevention strategies are intensive<sup>39</sup>.  
8  
9

10 295

11  
12  
13 296 There are a few follow-up-studies examining whether the fatty liver increases the risk for total  
14  
15 297 mortality<sup>13,40</sup>. In the present study, severe fatty liver predicted the risk for overall mortality of  
16  
17 298 any causes when age, gender and study group were added covariates, a result in line with an  
18  
19 299 earlier report<sup>41</sup>. In the published literature, NASH rather than simple steatosis has been stated  
20  
21 300 to be linked with decreased overall survival<sup>35</sup> although one study with a large cohort found no  
22  
23 301 association between NAFLD and overall mortality<sup>13</sup>. In our study, the association between  
24  
25 302 severe fatty liver and total mortality disappeared after further adjustment for BMI which  
26  
27 303 means that severe fatty liver is not a strong predictor for overall mortality.  
28  
29  
30  
31

32 304

33  
34  
35 305 The molecular mechanisms linking fatty liver with CVD have been investigated<sup>10,16</sup>.  
36  
37 306 Enlarged visceral adipose tissue may explain why NAFLD associates with CVD<sup>16</sup>. In  
38  
39 307 individuals with visceral obesity, insulin resistance may contribute to impaired non-esterified  
40  
41 308 fatty acid (NEFA) metabolism<sup>8</sup> and the increasing NEFA flux to the liver may impair liver  
42  
43 309 metabolism leading to increased glucose metabolism and liver dysfunction<sup>7</sup>. The liver is one  
44  
45 310 of the targets of the resulting systemic abnormalities and the source of several proatherogenic  
46  
47 311 factors<sup>3</sup>, such as CRP, fibrinogen, plasminogen activator inhibitor-1 and other inflammatory  
48  
49 312 cytokines<sup>16</sup>. Furthermore, visceral adipose tissue and ectopic fat overexpress factors involved  
50  
51 313 in atherogenesis<sup>16</sup> such as NEFAs and proinflammatory cytokines, for instance interleukin-6  
52  
53  
54  
55  
56  
57  
58  
59  
60

1  
2  
3 314 and tumor necrosis factor- $\alpha$ <sup>8</sup> leading to chronic systemic inflammation. In addition, hepatic  
4  
5 315 steatosis leads to overproduction of cholesterol-rich remnant particles<sup>4</sup>.  
6  
7

8 316

9  
10 317 One limitation in this study is that the grade of liver brightness was measured by ultrasound.  
11  
12 318 The invasive diagnostic technique of liver biopsy is regarded as the “golden standard”,  
13  
14 319 especially for the diagnosis of NASH<sup>42</sup>. Real time ultrasound using a combination of  
15  
16 320 sonographic findings does have a high specificity but it underestimates the prevalence of  
17  
18 321 hepatic steatosis when there is less than 20 % fat<sup>43</sup>. Today, magnetic resonance spectroscopy  
19  
20 322 is regarded as the best method for the quantification of liver fat, but this method is limited due  
21  
22 323 to its availability<sup>44</sup>. Nonetheless, the noninvasive ultrasound method was chosen because  
23  
24 324 taking liver biopsies from large groups of symptomless subjects would have been ethically  
25  
26 325 unjustifiable and magnetic resonance spectroscopy was not available at the baseline.  
27  
28  
29  
30

31 326

32  
33  
34  
35 327 The OPERA study group consists of subjects with drug-treated hypertension and randomly  
36  
37 328 selected sex- and age-matched controls. Study group was added as a covariate to minimize  
38  
39 329 any selection bias.  
40

## 41 42 330 **Conclusions**

43  
44  
45 331 Severe liver fat content increased the risk of a future cardiovascular event and mortality to  
46  
47 332 cardiovascular disease over the long-term follow-up but it seemed to be dependent on insulin  
48  
49 333 sensitivity. Fatty liver also predicted the risk for overall mortality. However, conventional  
50  
51 334 cardiovascular disease risk factors seemed to play a major role in developing death from all  
52  
53 335 causes. It would be beneficial to investigate larger cohorts and follow-up studies in order to  
54  
55 336 validate this result.  
56  
57  
58  
59  
60

1  
2  
3 337  
4  
56 338 **Figure legend**  
78  
9 339 Title: Kaplan Meier cumulative survival rates censored for cardiovascular death in subjects  
10  
11 340 with no fat in the liver, moderate fat content and severe fat content.  
1213  
14 341 CVD was the cause of death in 3.6% of the subjects (26/720) with non-fatty liver and 8.1%  
15  
16 342 of the subjects (10/124) with moderate liver fat content, while 12.5% of the subjects with  
17  
18 343 severe fatty liver (18/144). Cox regression analysis is used for adjustments. M1 (Model 1):  
19  
20 344 adjusted for study group, age and gender. M2 (Model 2): further adjustments for smoking,  
21  
22 345 alcohol consumption, systolic blood pressure, LDL-cholesterol level and body mass index.  
23  
24 346 M3 (Model 3): further adjustment for QUICKI. CVD, cardiovascular disease, CI, confidence  
25  
26 347 interval, HR, hazard ratio, QUICKI, quantitative insulin sensitivity check index. \*\*  $p < 0.01$ ,  
27  
28 348 \*  $p < 0.05$ .  
29  
30  
3132  
33 349  
3435  
36 350 **Acknowledgements**  
3738  
39 351 The authors thank Markku Päivänsalo, MD, PhD, for the expert liver ultrasound examinations  
40  
41 352 and Ms Saija Kortetjärvi, Ms Liisa Mannermaa, and Ms Leena Ukkola for the excellent  
42  
43 353 technical assistance. M.Sc. Elina Malo and M.Sc. Meiju Saukko are thanked for the  
44  
45 354 cooperation in organizing cardiovascular event and mortality data.  
46  
47  
4849  
50 355  
5152  
53 356  
5455  
56 357  
57  
58  
59  
60

1  
2  
3 358 **Contributorship** The authors thank Markku Päivänsalo, MD, PhD, for the expert liver  
4  
5 359 ultrasound examinations and Ms Saija Kortetjärvi, Ms Liisa Mannermaa, and Ms Leena  
6  
7 360 Ukkola for the excellent technical assistance. M.Sc. Elina Malo and M.Sc. Meiju Saukko are  
8  
9 361 thanked for the cooperation in organizing cardiovascular event and mortality data.

11  
12  
13 362 **Funding** Finnish Foundation for Cardiovascular Research

14  
15  
16 363 **Competing Interests** None

17  
18  
19  
20 364

21  
22  
23 365

24  
25  
26 366

27  
28  
29  
30 367

31  
32  
33 368

34  
35  
36 369

37  
38  
39  
40 370

41  
42  
43 371

44  
45  
46 372

47  
48  
49  
50 373

51  
52  
53 374

54  
55  
56 375

57  
58  
59  
60



376

377 **References**

378 **1. Angulo P. Nonalcoholic fatty liver disease. *N Engl J Med* 2002; Apr 18;346(16):1221-**  
379 **31.**

380 **2. Armstrong MJ, Houlihan DD, Bentham L, Shaw JC, Cramb R, Olliff S, et al.**  
381 **Presence and severity of non-alcoholic fatty liver disease in a large prospective primary**  
382 **care cohort. *J Hepatol* 2012; Jan;56(1):234-40.**

383 **3. Targher G, Day CP, Bonora E. Risk of cardiovascular disease in patients with**  
384 **nonalcoholic fatty liver disease. *N Engl J Med* 2010; Sep 30;363(14):1341-50.**

385 **4. Targher G, Arcaro G. Non-alcoholic fatty liver disease and increased risk of**  
386 **cardiovascular disease. *Atherosclerosis* 2007; Apr;191(2):235-40.**

387 **5. Roger VL, Go AS, Lloyd-Jones DM, Adams RJ, Berry JD, Brown TM, et al. Heart**  
388 **disease and stroke statistics--2011 update: a report from the American Heart**  
389 **Association. *Circulation* 2011; Feb 1;123(4):e18-e209.**

390 **6. Allender S, Scarborough P, Peto V, Rayner M, Leal J, Luengo-Fernandez R, Gray A.**  
391 **European cardiovascular disease statistics, 2008 ed. European Heart Network; 2008.**

392 **7. Despres JP, Lemieux I. Abdominal obesity and metabolic syndrome. *Nature* 2006; Dec**  
393 **14;444(7121):881-7.**

394 **8. Van Gaal LF, Mertens IL, De Block CE. Mechanisms linking obesity with**  
395 **cardiovascular disease. *Nature* 2006; Dec 14;444(7121):875-80.**

- 1  
2  
3 396 **9. Hansson GK. Inflammation, atherosclerosis, and coronary artery disease. *N Engl J***  
4  
5 397 ***Med* 2005; Apr 21;352(16):1685-95.**  
6  
7  
8 398 **10. Bhatia LS, Curzen NP, Byrne CD. Nonalcoholic fatty liver disease and vascular risk.**  
9  
10 399 ***Curr Opin Cardiol* 2012; Jul;27(4):420-8.**  
11  
12  
13  
14 400 **11. Treeprasertsuk S, Leverage S, Adams LA, Lindor KD, St Sauver J, Angulo P. The**  
15  
16 401 **Framingham risk score and heart disease in nonalcoholic fatty liver disease. *Liver Int***  
17  
18 402 **2012; Jul;32(6):945-50.**  
19  
20  
21  
22 403 **12. Haring R, Wallaschofski H, Nauck M, Dorr M, Baumeister SE, Volzke H.**  
23  
24 404 **Ultrasonographic hepatic steatosis increases prediction of mortality risk from elevated**  
25  
26 405 **serum gamma-glutamyl transpeptidase levels. *Hepatology* 2009; Nov;50(5):1403-11.**  
27  
28  
29  
30 406 **13. Lazo M, Hernaez R, Bonekamp S, Kamel IR, Brancati FL, Guallar E, et al. Non-**  
31  
32 407 **alcoholic fatty liver disease and mortality among US adults: prospective cohort study.**  
33  
34 408 ***BMJ* 2011; Nov 18;343:d6891.**  
35  
36  
37 409 **14. Wong VW, Wong GL, Yip GW, Lo AO, Limquiao J, Chu WC, et al. Coronary**  
38  
39 410 **artery disease and cardiovascular outcomes in patients with non-alcoholic fatty liver**  
40  
41 411 **disease. *Gut* 2011; Dec;60(12):1721-7.**  
42  
43  
44  
45 412 **15. Loria P, Lonardo A, Targher G. Is liver fat detrimental to vessels?: intersections in**  
46  
47 413 **the pathogenesis of NAFLD and atherosclerosis. *Clin Sci (Lond)* 2008; Jul;115(1):1-12.**  
48  
49  
50  
51 414 **16. Targher G, Marra F, Marchesini G. Increased risk of cardiovascular disease in non-**  
52  
53 415 **alcoholic fatty liver disease: causal effect or epiphenomenon?. *Diabetologia* 2008;**  
54  
55 416 **Nov;51(11):1947-53.**  
56  
57  
58  
59  
60

- 1  
2  
3 417 17. Targher G, Bertolini L, Scala L, Zoppini G, Zenari L, Falezza G. Non-alcoholic  
4  
5 418 hepatic steatosis and its relation to increased plasma biomarkers of inflammation and  
6  
7 419 endothelial dysfunction in non-diabetic men. Role of visceral adipose tissue. *Diabet Med*  
8  
9 420 2005; Oct;22(10):1354-8.
- 11  
12  
13 421 18. Brea A, Mosquera D, Martin E, Arizti A, Cordero JL, Ros E. Nonalcoholic fatty  
14  
15 422 liver disease is associated with carotid atherosclerosis: a case-control study. *Arterioscler*  
16  
17 423 *Thromb Vasc Biol* 2005; May;25(5):1045-50.
- 19  
20  
21 424 19. Sookoian S, Pirola CJ. Non-alcoholic fatty liver disease is strongly associated with  
22  
23 425 carotid atherosclerosis: a systematic review. *J Hepatol* 2008; Oct;49(4):600-7.
- 24  
25  
26 426 20. Fraser A, Harris R, Sattar N, Ebrahim S, Smith GD, Lawlor DA. Gamma-  
27  
28 427 glutamyltransferase is associated with incident vascular events independently of alcohol  
29  
30 428 intake: analysis of the British Women's Heart and Health Study and Meta-Analysis.  
31  
32 429 *Arterioscler Thromb Vasc Biol* 2007; Dec;27(12):2729-35.
- 34  
35  
36 430 21. Rantala AO, Kauma H, Lilja M, Savolainen MJ, Reunanen A, Kesaniemi YA.  
37  
38 431 Prevalence of the metabolic syndrome in drug-treated hypertensive patients and control  
39  
40 432 subjects. *J Intern Med* 1999; Feb;245(2):163-74.
- 42  
43  
44 433 22. Sampi M, Veneskoski M, Ukkola O, Kesaniemi YA, Horkko S. High plasma  
45  
46 434 immunoglobulin (Ig) A and low IgG antibody titers to oxidized low-density lipoprotein  
47  
48 435 are associated with markers of glucose metabolism. *J Clin Endocrinol Metab* 2010;  
49  
50 436 May;95(5):2467-75.
- 52  
53  
54 437 23. Pisto P, Ukkola O, Santaniemi M, Kesaniemi YA. Plasma adiponectin--an  
55  
56 438 independent indicator of liver fat accumulation. *Metabolism* 2011; Nov;60(11):1515-20.  
57  
58  
59  
60

- 1  
2  
3 439 24. Santaniemi M., Ukkola O., Malo E., Bloigu R., Kesaniemi YA. Metabolic syndrome  
4  
5 440 in the prediction of cardiovascular events: The potential additive role of hsCRP and  
6  
7 441 adiponectin. *Eur J Prev Cardiol* 2013; Jun 20.
- 8  
9  
10 442 25. Pajunen P, Jousilahti P, Borodulin K, Harald K, Tuomilehto J, Salomaa V. Body fat  
11  
12 443 measured by a near-infrared interactance device as a predictor of cardiovascular  
13  
14 444 events: the FINRISK'92 cohort. *Obesity (Silver Spring)* 2011; Apr;19(4):848-52.
- 15  
16  
17  
18 445 26. Katz A, Nambi SS, Mather K, Baron AD, Follmann DA, Sullivan G, et al.  
19  
20 446 Quantitative insulin sensitivity check index: a simple, accurate method for assessing  
21  
22 447 insulin sensitivity in humans. *J Clin Endocrinol Metab* 2000; Jul;85(7):2402-10.
- 23  
24  
25  
26 448 27. Kauma H, Savolainen MJ, Rantala AO, Lilja M, Kervinen K, Reunanen A, et al.  
27  
28 449 Apolipoprotein E phenotype determines the effect of alcohol on blood pressure in  
29  
30 450 middle-aged men. *Am J Hypertens* 1998; Nov;11(11 Pt 1):1334-43.
- 31  
32  
33  
34 451 28. Bessebinders K, Wielders J, van de Wiel A. Severe hypertriglyceridemia  
35  
36 452 influenced by alcohol (SHIBA). *Alcohol Alcohol* 2011; Mar-Apr;46(2):113-6.
- 37  
38  
39  
40 453 29. Hamaguchi M, Kojima T, Takeda N, Nagata C, Takeda J, Sarui H, et al.  
41  
42 454 Nonalcoholic fatty liver disease is a novel predictor of cardiovascular disease. *World J*  
43  
44 455 *Gastroenterol* 2007; Mar 14;13(10):1579-84.
- 45  
46  
47 456 30. Stepanova M, Younossi ZM. Independent Association Between Nonalcoholic Fatty  
48  
49 457 Liver Disease and Cardiovascular Disease in the US Population. *Clin Gastroenterol*  
50  
51 458 *Hepatol* 2012; Jun;10(6):646-50.
- 52  
53  
54  
55 459

- 1  
2  
3 460 **31. Targher G, Bertolini L, Poli F, Rodella S, Scala L, Tessari R, et al. Nonalcoholic fatty**  
4  
5 461 **liver disease and risk of future cardiovascular events among type 2 diabetic patients.**  
6  
7 462 ***Diabetes* 2005; Dec;54(12):3541-6.**  
8  
9  
10  
11 463 **32. Ghouri N, Preiss D, Sattar N. Liver enzymes, nonalcoholic fatty liver disease, and**  
12  
13 464 **incident cardiovascular disease: a narrative review and clinical perspective of**  
14  
15 465 **prospective data. *Hepatology* 2010; Sep;52(3):1156-61.**  
16  
17  
18 466 **33. Dunn W, Xu R, Wingard DL, Rogers C, Angulo P, Younossi ZM, et al. Suspected**  
19  
20 467 **nonalcoholic fatty liver disease and mortality risk in a population-based cohort study.**  
21  
22 468 ***Am J Gastroenterol* 2008; Sep;103(9):2263-71.**  
23  
24  
25  
26 469 **34. Ruttman E, Brant LJ, Concin H, Diem G, Rapp K, Ulmer H, et al. Gamma-**  
27  
28 470 **glutamyltransferase as a risk factor for cardiovascular disease mortality: an**  
29  
30 471 **epidemiological investigation in a cohort of 163,944 Austrian adults. *Circulation* 2005;**  
31  
32 472 **Oct 4;112(14):2130-7.**  
33  
34  
35  
36 473 **35. Soderberg C, Stal P, Askling J, Glaumann H, Lindberg G, Marmur J, et al.**  
37  
38 474 **Decreased survival of subjects with elevated liver function tests during a 28-year follow-**  
39  
40 475 **up. *Hepatology* 2010; Feb;51(2):595-602.**  
41  
42  
43  
44 476 **36. Ekstedt M, Franzen LE, Mathiesen UL, Thorelius L, Holmqvist M, Bodemar G, et**  
45  
46 477 **al. Long-term follow-up of patients with NAFLD and elevated liver enzymes. *Hepatology***  
47  
48 478 **2006; Oct;44(4):865-73.**  
49  
50  
51  
52 479 **37. Bhatia LS, Curzen NP, Calder PC, Byrne CD. Non-alcoholic fatty liver disease: a**  
53  
54 480 **new and important cardiovascular risk factor?. *Eur Heart J* 2012; May;33(10):1190-200.**  
55  
56  
57  
58  
59  
60

- 1  
2  
3 481 **38. Beckman JA, Creager MA, Libby P. Diabetes and atherosclerosis: epidemiology,**  
4  
5 482 **pathophysiology, and management. *JAMA* 2002; May 15;287(19):2570-81.**  
6  
7  
8  
9 483 **39. Joseph P, Teo K. Optimal medical therapy, lifestyle intervention, and secondary**  
10  
11 484 **prevention strategies for cardiovascular event reduction in ischemic heart disease. *Curr***  
12  
13 485 ***Cardiol Rep* 2011; Aug;13(4):287-95.**  
14  
15  
16 486 **40. Dam-Larsen S, Franzmann M, Andersen IB, Christoffersen P, Jensen LB, Sorensen**  
17  
18 487 **TI, et al. Long term prognosis of fatty liver: risk of chronic liver disease and death. *Gut***  
19  
20 488 **2004; May;53(5):750-5.**  
21  
22  
23  
24 489 **41. Calori G, Lattuada G, Ragona F, Garancini MP, Crosignani P, Villa M, et al. Fatty**  
25  
26 490 **liver index and mortality: the Cremona study in the 15th year of follow-up. *Hepatology***  
27  
28 491 **2011; Jul;54(1):145-52.**  
29  
30  
31  
32 492 **42. Joy D, Thava VR, Scott BB. Diagnosis of fatty liver disease: is biopsy necessary?. *Eur***  
33  
34 493 ***J Gastroenterol Hepatol* 2003; May;15(5):539-43.**  
35  
36  
37  
38 494 **43. Dasarathy S, Dasarathy J, Khiyami A, Joseph R, Lopez R, McCullough AJ. Validity**  
39  
40 495 **of real time ultrasound in the diagnosis of hepatic steatosis: a prospective study. *J***  
41  
42 496 ***Hepatol* 2009; Dec;51(6):1061-7.**  
43  
44  
45  
46 497 **44. Szczepaniak LS, Nurenberg P, Leonard D, Browning JD, Reingold JS, Grundy S, et**  
47  
48 498 **al. Magnetic resonance spectroscopy to measure hepatic triglyceride content: prevalence**  
49  
50 499 **of hepatic steatosis in the general population. *Am J Physiol Endocrinol Metab* 2005;**  
51  
52 500 **Feb;288(2):E462-8.**  
53  
54  
55  
56 501

502

| <b>Grade of liver<br/>bightness</b>         | <b>0<br/>(n=720)</b> | <b>1<br/>(n=124)</b> | <b>2<br/>(n=144)</b> | <b>p</b> | <b>p</b>     | <b>p</b>     | <b>p</b>     |
|---------------------------------------------|----------------------|----------------------|----------------------|----------|--------------|--------------|--------------|
|                                             |                      |                      |                      |          | <b>(0-1)</b> | <b>(1-2)</b> | <b>(0-2)</b> |
| <b>Age (years)</b>                          | 50.9 (6.0)           | 51.9 (6.1)           | 51.5 (5.5)           | NS       | NS           | NS           | NS           |
| <b>Males</b>                                | 44.3 %<br>(n=319)    | 65.3 %<br>(n=81)     | 59.9 %<br>(n=82)     | < 0.001  | -            | -            | -            |
| <b>Hypertensives</b>                        | 41.4 %<br>(n=298)    | 66.1 %<br>(n=82)     | 71.5 %<br>(n=103)    | < 0.001  | -            | -            | -            |
| <b>BMI (kg/m<sup>2</sup>)</b>               | 26.4 (3.9)           | 29.8 (5.0)           | 31.9 (4.9)           | < 0.001  | < 0.001      | < 0.001      | < 0.001      |
| <b>Waist circumference<br/>(cm)</b>         | 86.8 (11.9)          | 97.7 (12.0)          | 102.3<br>(11.8)      | < 0.001  | < 0.001      | < 0.01       | < 0.001      |
| <b>Smoking (pack years)</b>                 | 10.6 (13.3)          | 14.3 (14.9)          | 14.0 (14.6)          | < 0.05   | NS           | NS           | NS           |
| <b>Alcohol consumption<br/>(g/week)</b>     | 51.1 (83.0)          | 95.1<br>(117.0)      | 82.6<br>(105.1)      | < 0.01   | < 0.05       | NS           | NS           |
| <b>Total serum cholesterol<br/>(mmol/L)</b> | 5.6 (1.0)            | 5.8 (1.1)            | 5.8 (1.1)            | NS       | NS           | NS           | NS           |
| <b>LDL (mmol/L)</b>                         | 3.5 (0.9)            | 3.7 (1.1)            | 3.5 (0.9)            | NS       | NS           | NS           | NS           |
| <b>Triglycerides (mmol/L)</b>               | 1.4 (0.8)            | 1.9 (0.8)            | 2.2 (1.4)            | < 0.001  | < 0.001      | < 0.05       | < 0.001      |
| <b>Systolic blood pressure</b>              | 145.2<br>(21.5)      | 152.7<br>(20.3)      | 157.1<br>(22.2)      | < 0.001  | < 0.01       | NS           | < 0.001      |
| <b>Fasting insulin<br/>(mmol/L)</b>         | 10.8 (7.7)           | 18.2 (10.3)          | 23.8 (17.6)          | < 0.001  | < 0.001      | < 0.001      | < 0.001      |

|                                    |                    |                    |                    |         |         |         |         |
|------------------------------------|--------------------|--------------------|--------------------|---------|---------|---------|---------|
| <b>Fasting glucose</b>             | 4.4 (0.7)          | 5.0 (1.4)          | 6.1 (2.8)          | < 0.001 | < 0.001 | < 0.001 | < 0.001 |
| (mmol/L)                           |                    |                    |                    |         |         |         |         |
| <b>QUICKI</b>                      | 0.6 (0.1)          | 0.6 (0.1)          | 0.5 (0.1)          | < 0.001 | < 0.001 | < 0.001 | < 0.001 |
| <b>hs-CRP (ng/mL)</b>              | 3039.4<br>(6758.3) | 3981.4<br>(6068.2) | 6122.0<br>(6630.8) | < 0.001 | < 0.001 | < 0.01  | < 0.001 |
| <b>ALT U/L</b>                     | 26.2 (15.5)        | 37.8 (17.1)        | 55.4 (37.7)        | < 0.001 | < 0.001 | < 0.001 | < 0.001 |
| <b>GGT U/L</b>                     | 35.1 (33.5)        | 69.7<br>(116.3)    | 76.8 (92.4)        | < 0.001 | < 0.001 | < 0.01  | < 0.001 |
| <b>Anti-hypertensive treatment</b> | 43.6%<br>(n=314)   | 66.9%<br>(n=83)    | 72.9%<br>(n=105)   | < 0.001 | -       | -       | -       |
| <b>Lipid-lowering treatment</b>    | 2.2%<br>(n=16)     | 1.6% (n=2)         | 6.2% (n=9)         | < 0.05  | -       | -       | -       |
| <b>Hypoglycaemic drug</b>          | 1.1% (n=8)         | 1.6% (n=2)         | 10.4%<br>(n=15)    | < 0.001 | -       | -       | -       |
| <b>Type 2 diabetes</b>             | 2.4%<br>(n=17)     | 12.1%<br>(n=15)    | 36.8%<br>(n=53)    | < 0.001 | -       | -       | -       |

503

504 **Table 1.** Baseline characteristics of the study group as means (standard deviations) or  
505 percentages. N= number of subjects. ALT, alanine aminotransferase, BMI, body mass index,  
506 GGT, gamma-glutamyltransferase, hs-CRP, high-sensitivity C-reactive protein, LDL, low-  
507 density lipoprotein, QUICKI, quantitative insulin sensitivity check index.



508

|                                  | Model 1             | Model 2             | Model 3             | Model 4             | Model 5              |
|----------------------------------|---------------------|---------------------|---------------------|---------------------|----------------------|
| <b>Moderate fat content</b>      | 1.51 (0.99-2.29)    | 1.44 (0.93-2.23)    | 1.31 (0.84-2.05)    | 1.30 (0.84-2.01)    | 1.49 (0.99-2.26)     |
| <b>Severe fat content</b>        | 1.92 (1.32-2.80)**  | 1.74 (1.16-2.63) ** | 1.49 (0.97-2.30)    | 1.43 (0.93-2.18)    | 1.76 (1.21- 2.56) ** |
| <b>Study group</b>               | 1.34 (0.98-1.85)    | 1.29 (0.92-1.80)    | 1.28 (0.92-1.78)    |                     |                      |
| <b>Age</b>                       | 1.06 (1.03-1.09)*** | 1.05(1.02-1.08)**   | 1.05 (1.02-1.08)**  | 1.05 (1.02-1.07)**  | 1.05 (1.02-1.08) **  |
| <b>Gender</b>                    | 2.39 (1.71-3.34)*   | 1.91 (1.34-2.71)*** | 1.80 (1.26-2.57)**  | 1.83 (1.29-2.60) ** | 1.92 (1.36-2.72) *** |
| <b>LDL-cholesterol</b>           |                     | 1.17 (0.99-1.39)    | 1.15 (0.97-1.37)    |                     |                      |
| <b>Smoking (pack-years)</b>      |                     | 1.02 (1.01-1.03)*** | 1.02 (1.01-1.03)*** | 1.02 (1.01-1.03)*** | 1.02 (1.01-1.03) *** |
| <b>Alcohol consumption (gr1)</b> |                     | 0.93 (0.59-1.45)    | 0.92(0.59-1.44)     |                     |                      |
| <b>Alcohol consumption (gr2)</b> |                     | 0.84 (0.44-1.60)    | 0.81(0.42-1.54)     |                     |                      |
| <b>Systolic blood pressure</b>   |                     | 1.01 (1.00-1.02)**  | 1.01 (1.00-1.02)*   | 1.01 (1.00-1.02)**  | 1.01 (1.00-1.02) **  |
| <b>Body mass index</b>           |                     | 0.99 (0.96-1.03)    | 0.97 (0.93-1.01)    |                     |                      |
| <b>QUICKI</b>                    |                     |                     | 0.12 (0.02-0.90)*   | 0.16 (0.03-0.99)*   |                      |

509

510

1  
2  
3 511 **Table 2.** Multivariate analysis for cardiovascular events with different degrees of adjustments  
4  
5 512 (Cox regression analysis). CVD event occurred in 13.5% of the subjects with no fat in the  
6  
7 513 liver (97/720), 24.2% (30/124) of subjects having moderate liver fat content and 29.2%  
8  
9 514 (42/144) of the subjects having severe fatty liver. Hazard ratios with 95% confidence interval  
10  
11 515 with different degrees of adjustments are presented. Alcohol consumption was divided into  
12  
13 516 groups (reference group: less than 1g/week in men and women, group 1: less than 210g/week  
14  
15 517 in men and less than 140 g/week in women, group 2: more than 210g/week in men and more  
16  
17 518 than 140g/week in women). Model 1: adjustment for study group, age and gender. Model 2:  
18  
19 519 further adjustments for LDL-cholesterol, smoking, alcohol consumption, systolic blood  
20  
21 520 pressure and body mass index. Model 3: further adjustment for QUICKI. Model 4:  
22  
23 521 adjustments with statistically significant covariates. Model 5: adjustments with statistically  
24  
25 522 significant covariates without QUICKI. LDL, low-density lipoprotein, QUICKI, quantitative  
26  
27 523 insulin sensitivity check index. \*\*\* p < 0.001, \*\* p < 0.01, \* p < 0.05.  
28  
29  
30  
31  
32  
33 524  
34  
35  
36 525  
37  
38  
39 526  
40  
41  
42  
43 527  
44  
45  
46 528  
47  
48  
49 529  
50  
51  
52  
53 530  
54  
55  
56 531  
57  
58  
59  
60

| Final model    | Cardiovascular event<br>c-index (95% CI) | Binary R <sup>2</sup> |     |
|----------------|------------------------------------------|-----------------------|-----|
|                |                                          |                       | 532 |
|                |                                          |                       | 533 |
|                |                                          |                       | 534 |
| <b>Model 3</b> | 0.729 (0.706-0.776)                      | 0.153                 | 535 |
| <b>Model 4</b> | 0.720 (0.689-0.763)                      | 0.144                 | 536 |
|                |                                          |                       | 537 |
| <b>Model 5</b> | 0.717 (0.686-0.758)                      | 0.138                 | 538 |
|                |                                          |                       | 539 |
| <b>Model 1</b> | 0.698 (0.656-0.742)                      | 0.133                 |     |

**Table 3.** Multivariate analysis for cardiovascular events (logistic regression analysis). Cardiovascular disease risk factors have been removed from the models step by step. Model 3 included liver brightness, study group, age, gender, smoking, alcohol consumption, systolic blood pressure, LDL-cholesterol level, body mass index and QUICKI. Model 4 included liver brightness, age, gender, smoking, blood pressure and QUICKI. Model 5 included liver brightness, age, gender, smoking, blood pressure. Model 1 included liver brightness, study group, age and gender. C-index with confidence intervals obtained from 250 bootstrap resamplings and binary R<sup>2</sup> was used. LDL, low-density lipoprotein, QUICKI, quantitative insulin sensitivity check index.

1  
2  
3  
4  
5  
6  
7  
8  
9  
10  
11  
12  
13  
14  
15  
16  
17  
18  
19  
20  
21  
22  
23  
24  
25  
26  
27  
28  
29  
30  
31  
32  
33  
34  
35  
36  
37  
38  
39  
40  
41  
42  
43  
44  
45  
46  
47  
48  
49  
50  
51  
52  
53  
54  
55  
56  
57  
58  
59  
60

549

For peer review only

1  
2  
3  
4 1 **Fatty liver predicts the risk for cardiovascular events in middle-aged population: a**  
5  
6 2 **population-based cohort study**  
7  
8

9 3 Pauliina Pisto<sup>1</sup>, Merja Santaniemi<sup>1</sup>, Risto Bloigu<sup>2</sup>, Olavi Ukkola<sup>1</sup>, Y. Antero Kesäniemi<sup>1</sup>  
10

11  
12 4 <sup>1</sup>Institute of Clinical Medicine, Department of Internal Medicine and Biocenter Oulu,  
13  
14 University of Oulu, and Clinical Research Center, Oulu University Hospital, Oulu, Finland,  
15  
16 P.O. Box 20, 90029 OYS, Finland  
17

18  
19  
20 7 <sup>2</sup>Medical Informatics and Statistics Research Group, University of Oulu, Aapistie 7, P.O. Box  
21  
22 8 5000, 90014 Oulu, Finland  
23  
24

25 9 **Contact information:** Pauliina Pisto, corresponding author  
26

27  
28  
29 10 University of Oulu  
30

31  
32 11 Institute of Clinical Medicine  
33

34  
35 12 Department of Internal medicine  
36

37  
38 13 P.O. Box 5000, 90014 Oulu, Finland  
39

40  
41 14 Tel.: +35885376310  
42

43  
44 15 Fax: +35885376318  
45

46  
47  
48 16 E-mail: pauliina.pisto@oulu.fi  
49

50  
51 17 **Word count:** 5093  
52

53 18 **Keywords:** coronary disease, fatty liver, insulin resistance, risk factors, stroke  
54

55 19 **Financial support:** This study was supported by the Finnish Foundation for Cardiovascular  
56  
57  
58 20 Research, dated 16 Apr, 2012.  
59  
60

1  
2  
3 21 **Disclosure summary:** Authors report no conflict of interests.  
4  
5 22  
6

7 23 **ABSTRACT**  
8

9  
10 24 **Objective:** We investigated if the differences in liver fat content would predict the  
11  
12 25 development of non-fatal and fatal atherosclerotic endpoints (coronary heart disease and  
13  
14 26 stroke).  
15

16 27 **Design, setting and participants:** Our study group is a population-based, randomly recruited  
17  
18 28 cohort (OPERA), initiated in 1991. The cohort consisted of 988 middle-aged Finnish subjects.  
19

20  
21 29 **Intervention:** Total mortality and hospital events were followed up to 2009 based on the  
22  
23 30 registry of the National Institute for Health and Welfare and the National death registry.  
24

25 31 **Main outcome measure:** The severity of hepatic steatosis was measured by ultrasound and  
26  
27 32 divided into three groups (0-2). Cox regression analysis was used in the statistical analysis.  
28

29  
30 33 **Results:** In the follow-up of years 1991-2009, 13.5% of the subjects with non-fatty liver,  
31  
32 34 24.2% of subjects having moderate liver fat content and 29.2% of the subjects having severe  
33  
34 35 fatty liver experienced a cardiovascular event during the follow-up time ( $p < 0.001$ ). Severe  
35  
36 36 liver fat content predicted the risk for future risk of cardiovascular event even when adjusted  
37  
38 37 for age, gender and study group (HR 1.92, CI 1.32-2.80,  $p < 0.01$ ). When further adjustments  
39  
40 38 for smoking, alcohol consumption, LDL-cholesterol, BMI and systolic blood pressure were  
41  
42 39 conducted, the risk still remained statistically significant (HR 1.74, CI 1.16-2.63,  $p < 0.01$ ).  
43  
44 40 Statistical significance disappeared with further adjustment for QUICKI.  
45  
46

47 41 **Conclusions:** Liver fat content increases the risk of future cardiovascular disease event in  
48  
49 42 long-term follow-up but it seems to be dependent on insulin sensitivity.  
50  
51

52 43  
53

54 44  
55

56 45  
57  
58  
59  
60

1  
2  
3 46 **Article focus**  
4  
5

6 47 1 To investigate if the differences in liver fat content predict the risk for development of fatal  
7  
8 48 or nonfatal atherosclerotic endpoints such as coronary heart disease and stroke.  
9  
10

11 49  
12

13  
14 50 **Key messages**  
15  
16

17  
18 51 1 Subjects with ultrasound-diagnosed fatty liver have cardiovascular disease more often  
19  
20 52 compared to the subjects without fat in the liver  
21  
22

23 53 2 Severe liver fat content increases the risk of a future cardiovascular event and mortality to  
24  
25 54 cardiovascular disease over the long-term follow-up but it does seem to be dependent on  
26  
27 55 insulin sensitivity  
28  
29

30  
31 56 3 Severe fatty liver predicts the risk for overall mortality but the association is dependent on  
32  
33 57 traditional metabolic risk factors  
34  
35

36 58 **Strengths and limitations of the study**  
37  
38

39 59 **1 This is a follow-up study with** a large population-based study group and a very long follow-  
40  
41 60 up time  
42  
43

44  
45 61 2 Official registers used in event diagnoses - data is accurate and the classification is  
46  
47 62 systematic  
48  
49

50 63 3 Grade of liver brightness was measured by ultrasound, which has a high specificity but low  
51  
52 64 sensitivity  
53  
54

55 65  
56

57 66 **Introduction**  
58  
59  
60

1  
2  
3 67 Non-alcoholic fatty liver disease (NAFLD) refers to liver disorders such as abnormal fat  
4  
5 68 content, which exists in a spectrum ranging from steatosis with no inflammation to non-  
6  
7 69 alcoholic steatohepatitis (NASH), which can ultimately lead to liver cirrhosis <sup>1</sup>. The  
8  
9  
10 70 prevalence of NAFLD is estimated to range from 20 to 30% of population in Western  
11  
12 71 countries, being the leading cause of liver disorders <sup>2, 3</sup>. It is associated with obesity, type 2  
13  
14 72 diabetes mellitus (T2DM) and hyperlipidemia <sup>1</sup>. NAFLD is commonly regarded as a hepatic  
15  
16 73 manifestation of the metabolic syndrome and both conditions share several risk factors for  
17  
18 74 cardiovascular disease (CVD) <sup>3, 4</sup>.

21  
22 75

23  
24  
25 76 In 2008, the prevalence of CVD in adults ( $\geq 20$  years) in United States was 36.2% <sup>5</sup>. Every  
26  
27 77 year, 4.3 million subjects die for CVD in Europe causing nearly half of the all deaths (48%) <sup>6</sup>.  
28  
29 78 So-called traditional risk factors for cardiovascular disease are age, gender, smoking, high  
30  
31 79 low-density lipoprotein (LDL) cholesterol concentration, hypertension and diabetes <sup>7</sup>. In  
32  
33 80 addition, total body fatness as well as abdominal fat accumulation increase independently the  
34  
35 81 risk of CVD and insulin resistance is regarded to be an important factor linking visceral  
36  
37 82 adiposity to cardiovascular risk <sup>8</sup>. Adipose tissue is now recognized as a significant endocrine  
38  
39 83 organ as adipocytes and macrophages infiltrating adipocytes secrete a number of bioactive  
40  
41 84 mediators <sup>7</sup>. Adipokines, proinflammatory cytokines and hypofibrinolytic markers may lead to  
42  
43 85 oxidative stress and endothelial dysfunction, finally leading to atherosclerosis <sup>9</sup>.

44  
45  
46  
47  
48 86

49  
50  
51 87 Hepatic steatosis has been discussed as a possible mechanism to explain CVD morbidity and  
52  
53 88 mortality <sup>10</sup>. NAFLD patients have been reported to have higher coronary heart disease (CHD)  
54  
55 89 risk than the general population of the same age and gender <sup>11</sup>. According to previous study,



1  
2  
3 90 liver dysfunction associated with CVD mortality in men<sup>12</sup> whereas another large study found  
4  
5 91 no association between NAFLD and CVD in general population<sup>13</sup>. In addition, fatty liver did  
6  
7 92 not predict CVD mortality and morbidity in patients with established coronary artery disease  
8  
9  
10 93<sup>14</sup>.

11  
12  
13 94  
14  
15  
16 95 The NAFLD and CVD share several molecular mechanisms<sup>15,16</sup>. Fatty liver might play a part  
17  
18 96 in the pathogenesis of CVD through the overexpression and systemic release of several  
19  
20 97 inflammatory, hemostatic<sup>17</sup> and oxidative-stress mediators or via contributing to whole-body  
21  
22 98 insulin resistance and atherogenic dyslipidemia<sup>3</sup>. NAFLD has also been reported to be linked  
23  
24 99 with circulatory endothelial dysfunction<sup>4,14</sup>. Several investigators have reported that NAFLD  
25  
26 100 is associated with coronary artery disease<sup>4,14</sup> and increased carotid intima-media thickness<sup>18</sup>,  
27  
28 101<sup>19</sup>. Increased gamma-glutamyltransferase (GGT), which may be a marker of NAFLD, has  
29  
30 102 been reported to be associated with stroke<sup>20</sup>.

31  
32  
33  
34  
35 103

36  
37  
38 104 It is known that subjects with fatty liver disease have an increased risk of suffering CVD<sup>4</sup>, but  
39  
40 105 whether NAFLD is an independent indicator of cardiovascular disease is still far from clear.  
41  
42 106 Long-term follow-up studies are needed to clarify the correlation between fatty liver and  
43  
44 107 CVD. The aim of our study was to investigate if fatty liver could predict independently the  
45  
46 108 risk for total mortality as well as non-fatal and fatal cardiovascular endpoints with a 19-year  
47  
48 109 follow-up after adjusting for all known conventional risk factors.

50  
51  
52 110

53  
54  
55  
56 111 **Materials and methods**

## 112 **Human subjects**

113 OPERA (Oulu Project Elucidating Risk of Atherosclerosis) is a population-based,  
114 epidemiological prospective cohort study designed to address the risk factors and disease end  
115 points of atherosclerotic cardiovascular diseases. Selection criteria of the study subjects have  
116 been described earlier <sup>21</sup>. In short, a total of 520 men and 525 women participated: 259 control  
117 men, 261 hypertensive men, 267 control women and 258 hypertensive women aged 40-59.  
118 Hypertensive participants were randomly selected from the national register for  
119 reimbursement of the costs of antihypertensive medication. For each hypertensive subject, an  
120 age- and sex-matched control subject was randomly selected from the same register. Informed  
121 consent in writing was obtained from each patient. The study protocol conformed to the  
122 ethical guidelines of the 1975 Declaration of Helsinki and this study was approved by the  
123 Ethical Committee of the Faculty of Medicine, University of Oulu.

124

## 125 **Determination of hepatic steatosis**

126 The determination of **hepatic steatosis** was based on liver-kidney contrast measured with  
127 ultrasonography <sup>22</sup> by one trained radiologist **with 10 years' experience in abdominal**  
128 **ultrasound examinations**. The severity of **hepatic steatosis** was based on the brightness of the  
129 liver and it was classified into three groups ranging from 0 to 2 (0 = normal bright, indicating  
130 a non-fatty liver, 1 = medium bright, a moderate lipid content and 2 = clearly bright, a severe  
131 lipid content and fatty liver) <sup>23</sup>.

132

## 133 **Follow-up**

1  
2  
3 134 Both the hypertensive and the control men were recruited during December 1990 to May  
4  
5 135 1992 and the women approximately one year later (n=1045). In total, 1023 subjects had a  
6  
7 136 liver ultrasound result available at baseline. Mortality data were obtained from the National  
8  
9 137 Death Registry and the diagnoses of cardiovascular events were based on the registry of the  
10  
11 138 National Institute for Health and Welfare. The follow-up time ended December 31, 2009 or  
12  
13 139 whenever the first event occurred. Cardiovascular events included fatal and non-fatal  
14  
15 140 endpoints. Subjects with a previous hospital-diagnosed myocardial infarction or stroke (n=41)  
16  
17 141 at baseline were excluded. In total, 988 subjects participated in this part of the study.  
18  
19  
20  
21  
22  
23  
24

25 143 CVD included a major CHD event and stroke (excluding subarachnoid hemorrhage, SAH) -  
26  
27 144 whichever of these happened first<sup>24</sup>. The evidence of CHD was based on the following  
28  
29 145 diagnosis: I20.0, I21, I22 [ICD-10, International Statistical Classification of Diseases and  
30  
31 146 Related Health Problems] / 410, 4110 [ICD-8/9] as the main diagnosis (symptom or cause)  
32  
33 147 and I21, I22 [ICD-10] / 410 [ICD-8/9] as a first side diagnosis (symptom or cause) or second  
34  
35 148 side diagnosis (symptom or cause) and third side diagnosis (ICD-8/9 only) or if a subject had  
36  
37 149 undergone coronary artery bypass graft (CABG) surgery or angioplasty. CHD as a cause of  
38  
39 150 death included I20–I25, I46, R96, R98 [ICD-10] / 410-414, 798 (not 7980A) [ICD-8/9] as the  
40  
41 151 underlying cause of death or immediate cause of death and I21 or I22 [ICD-10] / 410 [ICD-  
42  
43 152 8/9] as first to third contributing cause of death. Stroke (excluding SAH) included I61, I63  
44  
45 153 (not I636), I64 [ICD -10] / 431, 4330A, 4331A, 4339A, 4340A, 4341A, 4349A, 436 [ICD-9] /  
46  
47 154 431 (except 43101, 43191) 433, 434, 436 [ICD-8] as main diagnosis (symptom or cause) or as  
48  
49 155 a first or second side diagnosis (symptom or cause) or as a third side diagnosis (ICD-8/9 only)  
50  
51 156 or as an underlying cause of death or immediate cause of death or as a first to third  
52  
53 157 contributing cause of death<sup>25</sup>.  
54  
55  
56  
57  
58  
59  
60

158

**Laboratory analyses**

Waist circumference, body mass index (BMI) and blood pressure were measured as described in previous study <sup>21</sup>.

162

All the laboratory test samples were obtained after an overnight fast. Blood insulin and glucose concentrations were analyzed at 0, 60, and 120 min after administration of 75 g glucose <sup>23</sup>. Insulin sensitivity was assessed using fasting plasma insulin concentrations and a quantitative insulin sensitivity check index (QUICKI)  $\{QUICKI=1/[\log(\text{fasting insulin})+\log(\text{fasting glucose})]\}$  <sup>26</sup>.

168

Very-low-density lipoprotein (VLDL), high-density lipoprotein (HDL), low-density lipoprotein (LDL) and hs-CRP concentrations <sup>23</sup> as well as alanine aminotransferase (ALT) and GGT levels were measured as described previously <sup>22</sup>. Alcohol consumption and smoking history were determined by validated questionnaires <sup>27</sup>. Alcohol consumption was divided into three groups: 0 (n=161) mean alcohol consumption less than 1g/week in men and women, 1 (n=767) mean consumption less than 210g/week in men and less than 140 g/week in women, 2 (n=76) mean alcohol consumption more than 210g/week in men and more than 140g/week in women. Group 2 designates large-scale alcohol consumers according to the guidelines <sup>28</sup>.

177

**Statistical analysis**

1  
2  
3 179 Statistical analysis was performed by using IBM SPSS Statistics for Windows, Version 20.0  
4  
5 180 (Armonk, NY: IBM Corp.). Analysis of variance was used to compare the means of the  
6  
7 181 variables measured. Post hoc tests were performed using the Tukey method. Statistical  
8  
9 182 significances between percentages were measured by using  $\chi^2$  test. Cumulative survival rates  
10  
11 183 were estimated using Kaplan-Meier method. Cox regression analysis was performed to  
12  
13 184 investigate if liver brightness (fat) could predict the future risk for total mortality,  
14  
15 185 cardiovascular death or hospital events. A p value < 0.05 was regarded as significant.  
16  
17  
18  
19

20 186

21  
22 187 Skewed variables (smoking, alcohol consumption, fasting insulin, fasting glucose,  
23  
24 188 triglyceride, ALT, GGT concentration, hs-CRP level) were logarithmically transformed to  
25  
26 189 improve normality before analysis of variance. We used three models with progressive  
27  
28 190 degrees of adjustments. Model 1 included study group (subjects with medicine-treated  
29  
30 191 hypertension and their age- and sex-matched controls), age and gender. Model 2 included  
31  
32 192 further adjustments for smoking, alcohol consumption, systolic blood pressure, LDL-  
33  
34 193 cholesterol level and body mass index. Model 3 included further adjustment for QUICKI. We  
35  
36 194 carried out sensitivity analyses: in the analyses of cardiovascular events, we added all  
37  
38 195 covariates one by one and investigated if the hazard ratios (HR) changed or remained stable  
39  
40 196 when further adjustment with one covariate was performed. Model 4 included variables which  
41  
42 197 were stable and were statistically significant in intermediate phases. Model 5 included stable  
43  
44 198 and significant covariates without QUICKI (Table 2).  
45  
46  
47  
48  
49

50 199

51  
52  
53 200 C-index was calculated for the model 1, model 3, model 4 and model 5 to assess the  
54  
55 201 discrimination of the risk markers. The analyses were performed in 250 bootstrap resamplings  
56  
57 202 to obtain 95% CI for c-index of each model.  
58  
59  
60

203

**204 Results**

205 The main baseline characteristics of the study group are shown in Table 1.

206

207 *Table 1 about here*

208

**209 Incidence of cardiovascular disease**

210 The median follow-up time was 212 (maximum 228) months. During the follow-up time,  
211 13.5% of the subjects with no fat in the liver (97/720), 24.2% (30/124) of subjects having  
212 moderate liver fat content and 29.2% (42/144) of the subjects having severe fatty liver  
213 experienced a CVD event ( $p < 0.001$ ). CVD was the cause of death in 3.6% of the subjects  
214 with non-fatty liver (26/720) and 8.1% of the subjects with moderate liver fat content  
215 (10/124), while 12.5% (18/144) of the subjects with severe fatty liver ( $p < 0.001$ ).

216

217 Severe liver fat content predicted the risk for future risk of cardiovascular event when  
218 adjusted for age, gender and study group (Model 1: HR 1.92, CI 1.32-2.80,  $p < 0.01$ ) (Table  
219 2). When further adjustments were made for smoking, alcohol consumption, LDL-cholesterol,  
220 BMI and systolic blood pressure (Model 2: HR 1.74, CI 1.16-2.63), the risk still remained  
221 statistically significant ( $p < 0.01$ ). Statistical significance disappeared when further  
222 adjustment for QUICKI was performed (Model 3: HR 1.49, CI 0.97-2.30,  $p=0.071$ ). In the  
223 CVD event sensitivity analyses, all covariates were added one by one and it was examined

1  
2  
3 224 whether the hazard ratios would change or remain stable. After adjusting for the statistically  
4  
5 225 significant variables (including quick index) in the sensitivity analyses, the association  
6  
7 226 between severe fatty liver was no longer significant (Model 4: HR 1.43, CI 0.93-2.18,  
8  
9 227  $p=0.10$ ). When QUICKI was not added into Model 5, severe fatty liver did predict the risk for  
10  
11 228 future risk for CVD event (HR 1.76, CI 1.21- 2.56,  $p < 0.001$ ) (Table 2). The c-index  
12  
13 229 decreased when the risk factors were removed from the model (Table 3).  
14  
15  
16  
17  
18  
19  
20  
21  
22  
23  
24  
25  
26  
27  
28  
29  
30  
31  
32  
33  
34  
35  
36  
37  
38  
39  
40  
41  
42  
43  
44  
45  
46  
47  
48  
49  
50  
51  
52  
53  
54  
55  
56  
57  
58  
59  
60

230

231 *Tables 2 and 3 about here*

232

233 The future risk of death from CVD in participants with severe fat content was significant  
234 when age, gender and study group were added as covariates (Model 1: HR 2.95, CI 1.58-5.51,  
235  $p < 0.01$ ). Even after further adjustments with other conventional risk factors (Model 2: HR  
236 2.04, CI 1.03-4.05), statistical significance remained ( $p < 0.05$ ). When QUICKI was added as  
237 the covariate, then significance disappeared (Model 3: HR 1.64, CI 0.79-3.43, NS) (Fig 1.).  
238

238

239 *Figure 1 about here*

240

#### 241 **Fatty liver and total mortality**

242 In total, 11.9% of the participants not having fatty liver, 18.5% of the subjects having  
243 moderate fatty liver and 22.2% of the subjects with severe fatty liver died from all causes ( $p <$   
244 0.01). According to Model 1, severe fat content predicted the risk for mortality from all

1  
2  
3 245 causes when age, gender and study group were added as covariates (HR 1.60, CI 1.05-2.43, p  
4  
5 246 < 0.05). The significance disappeared when body mass index was added as a covariate (data  
6  
7 247 not shown).  
8  
9

10 248

11  
12  
13 249 We performed all Cox regression analyses after excluding the men consuming more than 210  
14  
15 250 g alcohol and the women drinking more than 140 g alcohol per week. This exclusion did not  
16  
17 251 have any effect on the results (data not shown).  
18  
19

20  
21 252 We performed all Cox regression analyses after excluding patients with insulin treated  
22  
23 253 diabetes mellitus (n=9), cortisone treatment at baseline (n=41) and previous diagnosis for  
24  
25 254 liver disease (n=15) (e.g., virus, medications). This exclusion did not have any effect on the  
26  
27 255 results (data not shown).  
28  
29

## 30 31 256 **Discussion**

32  
33  
34 257 The incidences of non-alcoholic fatty liver disease and cardiovascular disease are  
35  
36 258 continuously increasing in the Western world. The question if NAFLD is only a marker or  
37  
38 259 also an early mediator of cardiovascular disease is still largely unanswered. According to the  
39  
40 260 results of the present study, which had an approximately 19-year follow-up fatty liver does  
41  
42 261 predict the future risk for death from all causes, death from cardiovascular disease and risk of  
43  
44 262 cardiovascular events. Insulin sensitivity seems to play a more dominant role in the  
45  
46 263 development of cardiovascular events.  
47  
48

49  
50 264

51  
52  
53 265 Only a few studies have investigated the risk for future cardiovascular risk among subjects  
54  
55 266 with ultrasound-diagnosed fatty liver<sup>29, 30</sup> and **larger studies with longer follow-up times are**  
56  
57 267 **needed**. An association between NAFLD and CVD has been reported<sup>3, 29-31</sup> **although contrary**  
58  
59  
60



1  
2  
3 268 results also exist<sup>13, 32</sup>. An association between ultrasound-diagnosed fatty liver and CVD has  
4  
5 269 been reported in general population<sup>29</sup> and in subjects with T2DM<sup>31</sup>. Furthermore, liver  
6  
7 270 dysfunction has been reported to associate with CVD mortality<sup>33, 34</sup> and CHD risk<sup>11</sup> in  
8  
9 271 follow-up studies and especially survival of subjects with NASH is reported to be reduced<sup>32,</sup>  
10  
11 272<sup>35, 36</sup>. In the present study, severe fatty liver disease did predict the risk for cardiovascular  
12  
13 273 death but the association seemed to be dependent on insulin sensitivity.  
14  
15  
16  
17  
18  
19

20  
21 274  
22  
23 275 Several earlier studies have used self-reported CVD history which may not be totally reliable.  
24  
25 276 Although earlier studies on the risk for future cardiovascular risk among subjects with fatty  
26  
27 277 liver have performed some adjustments, the full range of well-known CVD risk factors have  
28  
29 278 been rarely considered<sup>32</sup>. We have performed adjustments with all so-called traditional risk  
30  
31 279 factors for cardiovascular disease (i.e. age, gender, smoking, LDL concentration,  
32  
33 280 hypertension, insulin resistance). Previous studies have used biochemical, radiological and  
34  
35 281 histological methodology for NAFLD diagnosis and staging, which leads to a challenging  
36  
37 282 interpretation of the results<sup>34, 37</sup>.  
38  
39  
40  
41  
42  
43  
44  
45  
46  
47  
48  
49  
50  
51  
52  
53  
54  
55  
56  
57  
58  
59  
60

283  
284 This study had an approximately 19-year follow-up time, which is longer than in previous  
285 studies<sup>11-14</sup>. When compared to earlier studies<sup>32, 37</sup> this study seems to be the first follow-up  
286 study with a large population-based randomly selected study group and a very long follow-up  
287 time and ultrasound-diagnosed fatty liver. The diagnosis of cardiovascular events was based  
288 on the registry of the National Institute for Health and Welfare and mortality data were  
289 obtained from the National Death Registry. The earlier verified FINRISK classification<sup>25</sup> was  
290 used to classify the events. Therefore, the reliability of event diagnosis data is accurate and  
291 the classification is systematic. All subjects who had myocardial infarction or stroke before

1  
2  
3 292 baseline were excluded because a history of myocardial infarction is known to increase the  
4  
5 293 risk for recurrent myocardial infarction or cardiovascular death<sup>38</sup> and medication as well as  
6  
7 294 lifestyle secondary prevention strategies are intensive<sup>39</sup>.

8  
9  
10 295

11  
12  
13 296 **There are a few follow-up-studies examining whether the fatty liver increases the risk for total**  
14  
15 **mortality<sup>13, 40</sup>.** In the present study, severe fatty liver predicted the risk for overall mortality of  
16  
17 297  
18 298 any causes when age, gender and study group were added covariates, a result in line with an  
19  
20 299 earlier report<sup>41</sup>. In the published literature, NASH rather than simple steatosis has been stated  
21  
22 300 to be linked with decreased overall survival<sup>35</sup> although one study with a large cohort found no  
23  
24 301 association between NAFLD and overall mortality<sup>13</sup>. In our study, the association between  
25  
26 302 severe fatty liver and total mortality disappeared after further adjustment for BMI which  
27  
28 303 means that severe fatty liver is not a strong predictor for overall mortality.

29  
30  
31  
32 304

33  
34  
35 305 The molecular mechanisms linking fatty liver with CVD have been investigated<sup>10, 16</sup>.  
36  
37 306 Enlarged visceral adipose tissue may explain why NAFLD associates with CVD<sup>16</sup>. In  
38  
39 307 individuals with visceral obesity, insulin resistance may contribute to impaired non-esterified  
40  
41 308 fatty acid (NEFA) metabolism<sup>8</sup> and the increasing NEFA flux to the liver may impair liver  
42  
43 309 metabolism leading to increased glucose metabolism and liver dysfunction<sup>7</sup>. The liver is one  
44  
45 310 of the targets of the resulting systemic abnormalities and the source of several proatherogenic  
46  
47 311 factors<sup>3</sup>, such as CRP, fibrinogen, plasminogen activator inhibitor-1 and other inflammatory  
48  
49 312 cytokines<sup>16</sup>. Furthermore, visceral adipose tissue and ectopic fat overexpress factors involved  
50  
51 313 in atherogenesis<sup>16</sup> such as NEFAs and proinflammatory cytokines, for instance interleukin-6  
52  
53  
54  
55  
56  
57  
58  
59  
60

1  
2  
3 314 and tumor necrosis factor- $\alpha$ <sup>8</sup> leading to chronic systemic inflammation. In addition, hepatic  
4  
5 315 steatosis leads to overproduction of cholesterol-rich remnant particles<sup>4</sup>.  
6  
7

8  
9 316

10 317 One limitation in this study is that the grade of liver brightness was measured by ultrasound.  
11  
12 318 The invasive diagnostic technique of liver biopsy is regarded as the “golden standard”,  
13  
14 319 especially for the diagnosis of NASH<sup>42</sup>. Real time ultrasound using a combination of  
15  
16 320 sonographic findings does have a high specificity but it underestimates the prevalence of  
17  
18 321 hepatic steatosis when there is less than 20 % fat<sup>43</sup>. Today, magnetic resonance spectroscopy  
19  
20 322 is regarded as the best method for the quantification of liver fat, but this method is limited due  
21  
22 323 to its availability<sup>44</sup>. Nonetheless, the noninvasive ultrasound method was chosen because  
23  
24 324 taking liver biopsies from large groups of symptomless subjects would have been ethically  
25  
26 325 unjustifiable and magnetic resonance spectroscopy was not available at the baseline.  
27  
28  
29  
30

31  
32 326

33  
34  
35 327 The OPERA study group consists of subjects with drug-treated hypertension and randomly  
36  
37 328 selected sex- and age-matched controls. Study group was added as a covariate to minimize  
38  
39 329 any selection bias.  
40

## 41 42 330 **Conclusions**

43  
44  
45 331 Severe liver fat content increased the risk of a future cardiovascular event and mortality to  
46  
47 332 cardiovascular disease over the long-term follow-up but it seemed to be dependent on insulin  
48  
49 333 sensitivity. Fatty liver also predicted the risk for overall mortality. However, conventional  
50  
51 334 cardiovascular disease risk factors seemed to play a major role in developing death from all  
52  
53 335 causes. It would be beneficial to investigate larger cohorts and follow-up studies in order to  
54  
55 336 validate this result.  
56  
57  
58  
59  
60

337

**338 Figure legend**

339 Title: Kaplan Meier cumulative survival rates censored for cardiovascular death in subjects  
340 with no fat in the liver, moderate fat content and severe fat content.

341 CVD was the cause of death in 3.6% of the subjects (26/720) with non-fatty liver and 8.1%  
342 of the subjects (10/124) with moderate liver fat content, while 12.5% of the subjects with  
343 severe fatty liver (18/144). Cox regression analysis is used for adjustments. M1 (Model 1):  
344 adjusted for study group, age and gender. M2 (Model 2): further adjustments for smoking,  
345 alcohol consumption, systolic blood pressure, LDL-cholesterol level and body mass index.  
346 M3 (Model 3): further adjustment for QUICKI. CVD, cardiovascular disease, CI, confidence  
347 interval, HR, hazard ratio, QUICKI, quantitative insulin sensitivity check index. \*\*  $p < 0.01$ ,  
348 \*  $p < 0.05$ .

349

**350 Acknowledgements**

351 The authors thank Markku Päivänsalo, MD, PhD, for the expert liver ultrasound examinations  
352 and Ms Saija Kortetjärvi, Ms Liisa Mannermaa, and Ms Leena Ukkola for the excellent  
353 technical assistance. M.Sc. Elina Malo and M.Sc. Meiju Saukko are thanked for the  
354 cooperation in organizing cardiovascular event and mortality data.

355

356

357

358 **References**

- 359 **1. Angulo P. Nonalcoholic fatty liver disease. *N Engl J Med* 2002; Apr 18;346(16):1221-**  
360 **31.**
- 361 **2. Armstrong MJ, Houlihan DD, Bentham L, Shaw JC, Cramb R, Olliff S, et al.**  
362 **Presence and severity of non-alcoholic fatty liver disease in a large prospective primary**  
363 **care cohort. *J Hepatol* 2012; Jan;56(1):234-40.**
- 364 **3. Targher G, Day CP, Bonora E. Risk of cardiovascular disease in patients with**  
365 **nonalcoholic fatty liver disease. *N Engl J Med* 2010; Sep 30;363(14):1341-50.**
- 366 **4. Targher G, Arcaro G. Non-alcoholic fatty liver disease and increased risk of**  
367 **cardiovascular disease. *Atherosclerosis* 2007; Apr;191(2):235-40.**
- 368 **5. Roger VL, Go AS, Lloyd-Jones DM, Adams RJ, Berry JD, Brown TM, et al. Heart**  
369 **disease and stroke statistics--2011 update: a report from the American Heart**  
370 **Association. *Circulation* 2011; Feb 1;123(4):e18-e209.**
- 371 **6. Allender S, Scarborough P, Peto V, Rayner M, Leal J, Luengo-Fernandez R, Gray A.**  
372 **European cardiovascular disease statistics, 2008 ed. European Heart Network; 2008.**
- 373 **7. Despres JP, Lemieux I. Abdominal obesity and metabolic syndrome. *Nature* 2006; Dec**  
374 **14;444(7121):881-7.**
- 375 **8. Van Gaal LF, Mertens IL, De Block CE. Mechanisms linking obesity with**  
376 **cardiovascular disease. *Nature* 2006; Dec 14;444(7121):875-80.**
- 377 **9. Hansson GK. Inflammation, atherosclerosis, and coronary artery disease. *N Engl J***  
378 ***Med* 2005; Apr 21;352(16):1685-95.**

- 1  
2  
3 379 10. Bhatia LS, Curzen NP, Byrne CD. Nonalcoholic fatty liver disease and vascular risk.  
4  
5 380 *Curr Opin Cardiol* 2012; Jul;27(4):420-8.  
6  
7  
8  
9 381 11. Treeprasertsuk S, Leverage S, Adams LA, Lindor KD, St Sauver J, Angulo P. The  
10  
11 382 Framingham risk score and heart disease in nonalcoholic fatty liver disease. *Liver Int*  
12  
13 383 2012; Jul;32(6):945-50.  
14  
15  
16 384 12. Haring R, Wallaschofski H, Nauck M, Dorr M, Baumeister SE, Volzke H.  
17  
18 385 Ultrasonographic hepatic steatosis increases prediction of mortality risk from elevated  
19  
20 386 serum gamma-glutamyl transpeptidase levels. *Hepatology* 2009; Nov;50(5):1403-11.  
21  
22  
23  
24 387 13. Lazo M, Hernaez R, Bonekamp S, Kamel IR, Brancati FL, Guallar E, et al. Non-  
25  
26 388 alcoholic fatty liver disease and mortality among US adults: prospective cohort study.  
27  
28 389 *BMJ* 2011; Nov 18;343:d6891.  
29  
30  
31  
32 390 14. Wong VW, Wong GL, Yip GW, Lo AO, Limquiaco J, Chu WC, et al. Coronary  
33  
34 391 artery disease and cardiovascular outcomes in patients with non-alcoholic fatty liver  
35  
36 392 disease. *Gut* 2011; Dec;60(12):1721-7.  
37  
38  
39  
40 393 15. Loria P, Lonardo A, Targher G. Is liver fat detrimental to vessels?: intersections in  
41  
42 394 the pathogenesis of NAFLD and atherosclerosis. *Clin Sci (Lond)* 2008; Jul;115(1):1-12.  
43  
44  
45 395 16. Targher G, Marra F, Marchesini G. Increased risk of cardiovascular disease in non-  
46  
47 396 alcoholic fatty liver disease: causal effect or epiphenomenon?. *Diabetologia* 2008;  
48  
49 397 Nov;51(11):1947-53.  
50  
51  
52  
53 398 17. Targher G, Bertolini L, Scala L, Zoppini G, Zenari L, Falezza G. Non-alcoholic  
54  
55 399 hepatic steatosis and its relation to increased plasma biomarkers of inflammation and  
56  
57  
58  
59  
60

1  
2  
3 400 endothelial dysfunction in non-diabetic men. Role of visceral adipose tissue. *Diabet Med*  
4  
5 401 2005; Oct;22(10):1354-8.  
6  
7

8  
9 402 18. Brea A, Mosquera D, Martin E, Arizti A, Cordero JL, Ros E. Nonalcoholic fatty  
10  
11 403 liver disease is associated with carotid atherosclerosis: a case-control study. *Arterioscler*  
12  
13 404 *Thromb Vasc Biol* 2005; May;25(5):1045-50.  
14

15  
16 405 19. Sookoian S, Pirola CJ. Non-alcoholic fatty liver disease is strongly associated with  
17  
18 406 carotid atherosclerosis: a systematic review. *J Hepatol* 2008; Oct;49(4):600-7.  
19

20  
21  
22 407 20. Fraser A, Harris R, Sattar N, Ebrahim S, Smith GD, Lawlor DA. Gamma-  
23  
24 408 glutamyltransferase is associated with incident vascular events independently of alcohol  
25  
26 409 intake: analysis of the British Women's Heart and Health Study and Meta-Analysis.  
27  
28 410 *Arterioscler Thromb Vasc Biol* 2007; Dec;27(12):2729-35.  
29

30  
31  
32 411 21. Rantala AO, Kauma H, Lilja M, Savolainen MJ, Reunanen A, Kesaniemi YA.  
33  
34 412 Prevalence of the metabolic syndrome in drug-treated hypertensive patients and control  
35  
36 413 subjects. *J Intern Med* 1999; Feb;245(2):163-74.  
37

38  
39 414 22. Sampi M, Veneskoski M, Ukkola O, Kesaniemi YA, Horkko S. High plasma  
40  
41 415 immunoglobulin (Ig) A and low IgG antibody titers to oxidized low-density lipoprotein  
42  
43 416 are associated with markers of glucose metabolism. *J Clin Endocrinol Metab* 2010;  
44  
45 417 May;95(5):2467-75.  
46  
47

48  
49 418 23. Pisto P, Ukkola O, Santaniemi M, Kesaniemi YA. Plasma adiponectin--an  
50  
51 419 independent indicator of liver fat accumulation. *Metabolism* 2011; Nov;60(11):1515-20.  
52  
53  
54  
55  
56  
57  
58  
59  
60

- 1  
2  
3 420 24. Santaniemi M., Ukkola O., Malo E., Bloigu R., Kesaniemi YA. Metabolic syndrome  
4  
5 421 in the prediction of cardiovascular events: The potential additive role of hsCRP and  
6  
7 422 adiponectin. *Eur J Prev Cardiol* 2013; Jun 20.
- 8  
9  
10 423 25. Pajunen P, Jousilahti P, Borodulin K, Harald K, Tuomilehto J, Salomaa V. Body fat  
11  
12 424 measured by a near-infrared interactance device as a predictor of cardiovascular  
13  
14 425 events: the FINRISK'92 cohort. *Obesity (Silver Spring)* 2011; Apr;19(4):848-52.
- 15  
16  
17  
18 426 26. Katz A, Nambi SS, Mather K, Baron AD, Follmann DA, Sullivan G, et al.  
19  
20 427 Quantitative insulin sensitivity check index: a simple, accurate method for assessing  
21  
22 428 insulin sensitivity in humans. *J Clin Endocrinol Metab* 2000; Jul;85(7):2402-10.
- 23  
24  
25  
26 429 27. Kauma H, Savolainen MJ, Rantala AO, Lilja M, Kervinen K, Reunanen A, et al.  
27  
28 430 Apolipoprotein E phenotype determines the effect of alcohol on blood pressure in  
29  
30 431 middle-aged men. *Am J Hypertens* 1998; Nov;11(11 Pt 1):1334-43.
- 31  
32  
33  
34 432 28. Bessebinders K, Wielders J, van de Wiel A. Severe hypertriglyceridemia  
35  
36 433 influenced by alcohol (SHIBA). *Alcohol Alcohol* 2011; Mar-Apr;46(2):113-6.
- 37  
38  
39  
40 434 29. Hamaguchi M, Kojima T, Takeda N, Nagata C, Takeda J, Sarui H, et al.  
41  
42 435 Nonalcoholic fatty liver disease is a novel predictor of cardiovascular disease. *World J*  
43  
44 436 *Gastroenterol* 2007; Mar 14;13(10):1579-84.
- 45  
46  
47 437 30. Stepanova M, Younossi ZM. Independent Association Between Nonalcoholic Fatty  
48  
49 438 Liver Disease and Cardiovascular Disease in the US Population. *Clin Gastroenterol*  
50  
51 439 *Hepatol* 2012; Jun;10(6):646-50.
- 52  
53  
54  
55 440



- 1  
2  
3 441 31. Targher G, Bertolini L, Poli F, Rodella S, Scala L, Tessari R, et al. Nonalcoholic fatty  
4  
5 442 liver disease and risk of future cardiovascular events among type 2 diabetic patients.  
6  
7 443 *Diabetes* 2005; Dec;54(12):3541-6.  
8  
9  
10  
11 444 32. Ghouri N, Preiss D, Sattar N. Liver enzymes, nonalcoholic fatty liver disease, and  
12  
13 445 incident cardiovascular disease: a narrative review and clinical perspective of  
14  
15 446 prospective data. *Hepatology* 2010; Sep;52(3):1156-61.  
16  
17  
18 447 33. Dunn W, Xu R, Wingard DL, Rogers C, Angulo P, Younossi ZM, et al. Suspected  
19  
20 448 nonalcoholic fatty liver disease and mortality risk in a population-based cohort study.  
21  
22 449 *Am J Gastroenterol* 2008; Sep;103(9):2263-71.  
23  
24  
25  
26 450 34. Ruttman E, Brant LJ, Concin H, Diem G, Rapp K, Ulmer H, et al. Gamma-  
27  
28 451 glutamyltransferase as a risk factor for cardiovascular disease mortality: an  
29  
30 452 epidemiological investigation in a cohort of 163,944 Austrian adults. *Circulation* 2005;  
31  
32 453 Oct 4;112(14):2130-7.  
33  
34  
35  
36 454 35. Soderberg C, Stal P, Askling J, Glaumann H, Lindberg G, Marmur J, et al.  
37  
38 455 Decreased survival of subjects with elevated liver function tests during a 28-year follow-  
39  
40 456 up. *Hepatology* 2010; Feb;51(2):595-602.  
41  
42  
43  
44 457 36. Ekstedt M, Franzen LE, Mathiesen UL, Thorelius L, Holmqvist M, Bodemar G, et  
45  
46 458 al. Long-term follow-up of patients with NAFLD and elevated liver enzymes. *Hepatology*  
47  
48 459 2006; Oct;44(4):865-73.  
49  
50  
51  
52 460 37. Bhatia LS, Curzen NP, Calder PC, Byrne CD. Non-alcoholic fatty liver disease: a  
53  
54 461 new and important cardiovascular risk factor?. *Eur Heart J* 2012; May;33(10):1190-200.  
55  
56  
57  
58  
59  
60

- 1  
2  
3 462 **38. Beckman JA, Creager MA, Libby P. Diabetes and atherosclerosis: epidemiology,**  
4  
5 463 **pathophysiology, and management. *JAMA* 2002; May 15;287(19):2570-81.**  
6  
7  
8  
9 464 **39. Joseph P, Teo K. Optimal medical therapy, lifestyle intervention, and secondary**  
10  
11 465 **prevention strategies for cardiovascular event reduction in ischemic heart disease. *Curr***  
12  
13 466 ***Cardiol Rep* 2011; Aug;13(4):287-95.**  
14  
15  
16 467 **40. Dam-Larsen S, Franzmann M, Andersen IB, Christoffersen P, Jensen LB, Sorensen**  
17  
18 468 **TI, et al. Long term prognosis of fatty liver: risk of chronic liver disease and death. *Gut***  
19  
20 469 **2004; May;53(5):750-5.**  
21  
22  
23  
24 470 **41. Calori G, Lattuada G, Ragona F, Garancini MP, Crosignani P, Villa M, et al. Fatty**  
25  
26 471 **liver index and mortality: the Cremona study in the 15th year of follow-up. *Hepatology***  
27  
28 472 **2011; Jul;54(1):145-52.**  
29  
30  
31  
32 473 **42. Joy D, Thava VR, Scott BB. Diagnosis of fatty liver disease: is biopsy necessary?. *Eur***  
33  
34 474 ***J Gastroenterol Hepatol* 2003; May;15(5):539-43.**  
35  
36  
37  
38 475 **43. Dasarathy S, Dasarathy J, Khiyami A, Joseph R, Lopez R, McCullough AJ. Validity**  
39  
40 476 **of real time ultrasound in the diagnosis of hepatic steatosis: a prospective study. *J***  
41  
42 477 ***Hepatol* 2009; Dec;51(6):1061-7.**  
43  
44  
45 478 **44. Szczepaniak LS, Nurenberg P, Leonard D, Browning JD, Reingold JS, Grundy S, et**  
46  
47 479 **al. Magnetic resonance spectroscopy to measure hepatic triglyceride content: prevalence**  
48  
49 480 **of hepatic steatosis in the general population. *Am J Physiol Endocrinol Metab* 2005;**  
50  
51 481 **Feb;288(2):E462-8.**  
52  
53  
54  
55 482

483

| <b>Grade of liver<br/>bightness</b>         | <b>0<br/>(n=720)</b> | <b>1<br/>(n=124)</b> | <b>2<br/>(n=144)</b> | <b>p</b> | <b>p</b>     | <b>p</b>     | <b>p</b>     |
|---------------------------------------------|----------------------|----------------------|----------------------|----------|--------------|--------------|--------------|
|                                             |                      |                      |                      |          | <b>(0-1)</b> | <b>(1-2)</b> | <b>(0-2)</b> |
| <b>Age (years)</b>                          | 50.9 (6.0)           | 51.9 (6.1)           | 51.5 (5.5)           | NS       | NS           | NS           | NS           |
| <b>Males</b>                                | 44.3 %<br>(n=319)    | 65.3 %<br>(n=81)     | 59.9 %<br>(n=82)     | < 0.001  | -            | -            | -            |
| <b>Hypertensives</b>                        | 41.4 %<br>(n=298)    | 66.1 %<br>(n=82)     | 71.5 %<br>(n=103)    | < 0.001  | -            | -            | -            |
| <b>BMI (kg/m<sup>2</sup>)</b>               | 26.4 (3.9)           | 29.8 (5.0)           | 31.9 (4.9)           | < 0.001  | < 0.001      | < 0.001      | < 0.001      |
| <b>Waist circumference<br/>(cm)</b>         | 86.8 (11.9)          | 97.7 (12.0)          | 102.3<br>(11.8)      | < 0.001  | < 0.001      | < 0.01       | < 0.001      |
| <b>Smoking (pack years)</b>                 | 10.6 (13.3)          | 14.3 (14.9)          | 14.0 (14.6)          | < 0.05   | NS           | NS           | NS           |
| <b>Alcohol consumption<br/>(g/week)</b>     | 51.1 (83.0)          | 95.1<br>(117.0)      | 82.6<br>(105.1)      | < 0.01   | < 0.05       | NS           | NS           |
| <b>Total serum cholesterol<br/>(mmol/L)</b> | 5.6 (1.0)            | 5.8 (1.1)            | 5.8 (1.1)            | NS       | NS           | NS           | NS           |
| <b>LDL (mmol/L)</b>                         | 3.5 (0.9)            | 3.7 (1.1)            | 3.5 (0.9)            | NS       | NS           | NS           | NS           |
| <b>Triglycerides (mmol/L)</b>               | 1.4 (0.8)            | 1.9 (0.8)            | 2.2 (1.4)            | < 0.001  | < 0.001      | < 0.05       | < 0.001      |
| <b>Systolic blood pressure</b>              | 145.2<br>(21.5)      | 152.7<br>(20.3)      | 157.1<br>(22.2)      | < 0.001  | < 0.01       | NS           | < 0.001      |
| <b>Fasting insulin<br/>(mmol/L)</b>         | 10.8 (7.7)           | 18.2 (10.3)          | 23.8 (17.6)          | < 0.001  | < 0.001      | < 0.001      | < 0.001      |

|                                        |                    |                    |                    |         |         |         |         |
|----------------------------------------|--------------------|--------------------|--------------------|---------|---------|---------|---------|
| <b>Fasting glucose</b>                 | 4.4 (0.7)          | 5.0 (1.4)          | 6.1 (2.8)          | < 0.001 | < 0.001 | < 0.001 | < 0.001 |
| <b>(mmol/L)</b>                        |                    |                    |                    |         |         |         |         |
| <b>QUICKI</b>                          | 0.6 (0.1)          | 0.6 (0.1)          | 0.5 (0.1)          | < 0.001 | < 0.001 | < 0.001 | < 0.001 |
| <b>hs-CRP (ng/mL)</b>                  | 3039.4<br>(6758.3) | 3981.4<br>(6068.2) | 6122.0<br>(6630.8) | < 0.001 | < 0.001 | < 0.01  | < 0.001 |
| <b>ALT U/L</b>                         | 26.2 (15.5)        | 37.8 (17.1)        | 55.4 (37.7)        | < 0.001 | < 0.001 | < 0.001 | < 0.001 |
| <b>GGT U/L</b>                         | 35.1 (33.5)        | 69.7<br>(116.3)    | 76.8 (92.4)        | < 0.001 | < 0.001 | < 0.01  | < 0.001 |
| <b>Anti-hypertensive<br/>treatment</b> | 43.6%<br>(n=314)   | 66.9%<br>(n=83)    | 72.9%<br>(n=105)   | < 0.001 | -       | -       | -       |
| <b>Lipid-lowering<br/>treatment</b>    | 2.2%<br>(n=16)     | 1.6% (n=2)         | 6.2% (n=9)         | < 0.05  | -       | -       | -       |
| <b>Hypoglycaemic drug</b>              | 1.1% (n=8)         | 1.6% (n=2)         | 10.4%<br>(n=15)    | < 0.001 | -       | -       | -       |
| <b>Type 2 diabetes</b>                 | 2.4%<br>(n=17)     | 12.1%<br>(n=15)    | 36.8%<br>(n=53)    | < 0.001 | -       | -       | -       |

484

485 **Table 1.** Baseline characteristics of the study group as means (standard deviations) or  
486 percentages. N= number of subjects. ALT, alanine aminotransferase, BMI, body mass index,  
487 GGT, gamma-glutamyltransferase, hs-CRP, high-sensitivity C-reactive protein, LDL, low-  
488 density lipoprotein, QUICKI, quantitative insulin sensitivity check index.

489

|                                  | Model 1             | Model 2             | Model 3             | Model 4             | Model 5              |
|----------------------------------|---------------------|---------------------|---------------------|---------------------|----------------------|
| <b>Moderate fat content</b>      | 1.51 (0.99-2.29)    | 1.44 (0.93-2.23)    | 1.31 (0.84-2.05)    | 1.30 (0.84-2.01)    | 1.49 (0.99-2.26)     |
| <b>Severe fat content</b>        | 1.92 (1.32-2.80)**  | 1.74 (1.16-2.63) ** | 1.49 (0.97-2.30)    | 1.43 (0.93-2.18)    | 1.76 (1.21- 2.56) ** |
| <b>Study group</b>               | 1.34 (0.98-1.85)    | 1.29 (0.92-1.80)    | 1.28 (0.92-1.78)    |                     |                      |
| <b>Age</b>                       | 1.06 (1.03-1.09)*** | 1.05(1.02-1.08)**   | 1.05 (1.02-1.08)**  | 1.05 (1.02-1.07)**  | 1.05 (1.02-1.08) **  |
| <b>Gender</b>                    | 2.39 (1.71-3.34)*   | 1.91 (1.34-2.71)*** | 1.80 (1.26-2.57)**  | 1.83 (1.29-2.60) ** | 1.92 (1.36-2.72) *** |
| <b>LDL-cholesterol</b>           |                     | 1.17 (0.99-1.39)    | 1.15 (0.97-1.37)    |                     |                      |
| <b>Smoking (pack-years)</b>      |                     | 1.02 (1.01-1.03)*** | 1.02 (1.01-1.03)*** | 1.02 (1.01-1.03)*** | 1.02 (1.01-1.03) *** |
| <b>Alcohol consumption (gr1)</b> |                     | 0.93 (0.59-1.45)    | 0.92(0.59-1.44)     |                     |                      |
| <b>Alcohol consumption (gr2)</b> |                     | 0.84 (0.44-1.60)    | 0.81(0.42-1.54)     |                     |                      |
| <b>Systolic blood pressure</b>   |                     | 1.01 (1.00-1.02)**  | 1.01 (1.00-1.02)*   | 1.01 (1.00-1.02)**  | 1.01 (1.00-1.02) **  |
| <b>Body mass index</b>           |                     | 0.99 (0.96-1.03)    | 0.97 (0.93-1.01)    |                     |                      |
| <b>QUICKI</b>                    |                     |                     | 0.12 (0.02-0.90)*   | 0.16 (0.03-0.99)*   |                      |

490

491

1  
2  
3 492 **Table 2.** Multivariate analysis for cardiovascular events with different degrees of adjustments  
4  
5 493 (Cox regression analysis). CVD event occurred in 13.5% of the subjects with no fat in the  
6  
7 494 liver (97/720), 24.2% (30/124) of subjects having moderate liver fat content and 29.2%  
8  
9 495 (42/144) of the subjects having severe fatty liver. Hazard ratios with 95% confidence interval  
10  
11 496 with different degrees of adjustments are presented. Alcohol consumption was divided into  
12  
13 497 groups (reference group: less than 1g/week in men and women, group 1: less than 210g/week  
14  
15 498 in men and less than 140 g/week in women, group 2: more than 210g/week in men and more  
16  
17 499 than 140g/week in women). Model 1: adjustment for study group, age and gender. Model 2:  
18  
19 500 further adjustments for LDL-cholesterol, smoking, alcohol consumption, systolic blood  
20  
21 501 pressure and body mass index. Model 3: further adjustment for QUICKI. Model 4:  
22  
23 502 adjustments with statistically significant covariates. Model 5: adjustments with statistically  
24  
25 503 significant covariates without QUICKI. LDL, low-density lipoprotein, QUICKI, quantitative  
26  
27 504 insulin sensitivity check index. \*\*\*  $p < 0.001$ , \*\*  $p < 0.01$ , \*  $p < 0.05$ .  
28  
29  
30  
31  
32  
33  
34  
35  
36  
37  
38  
39  
40  
41  
42  
43  
44  
45  
46  
47  
48  
49  
50  
51  
52  
53  
54  
55  
56  
57  
58  
59  
60

| Final model    | Cardiovascular event<br>c-index (95% CI) | Binary R <sup>2</sup> |     |
|----------------|------------------------------------------|-----------------------|-----|
|                |                                          |                       | 513 |
|                |                                          |                       | 514 |
|                |                                          |                       | 515 |
| <b>Model 3</b> | 0.729 (0.706-0.776)                      | 0.153                 | 516 |
| <b>Model 4</b> | 0.720 (0.689-0.763)                      | 0.144                 | 517 |
|                |                                          |                       | 518 |
| <b>Model 5</b> | 0.717 (0.686-0.758)                      | 0.138                 | 519 |
|                |                                          |                       | 520 |
| <b>Model 1</b> | 0.698 (0.656-0.742)                      | 0.133                 |     |

**Table 3.** Multivariate analysis for cardiovascular events (logistic regression analysis). Cardiovascular disease risk factors have been removed from the models step by step. Model 3 included liver brightness, study group, age, gender, smoking, alcohol consumption, systolic blood pressure, LDL-cholesterol level, body mass index and QUICKI. Model 4 included liver brightness, age, gender, smoking, blood pressure and QUICKI. Model 5 included liver brightness, age, gender, smoking, blood pressure. Model 1 included liver brightness, study group, age and gender. C-index with confidence intervals obtained from 250 bootstrap resamplings and binary R<sup>2</sup> was used. LDL, low-density lipoprotein, QUICKI, quantitative insulin sensitivity check index.

1  
2  
3  
4  
5  
6  
7  
8  
9  
10  
11  
12  
13  
14  
15  
16  
17  
18  
19  
20  
21  
22  
23  
24  
25  
26  
27  
28  
29  
30  
31  
32  
33  
34  
35  
36  
37  
38  
39  
40  
41  
42  
43  
44  
45  
46  
47  
48  
49  
50  
51  
52  
53  
54  
55  
56  
57  
58  
59  
60

530

For peer review only



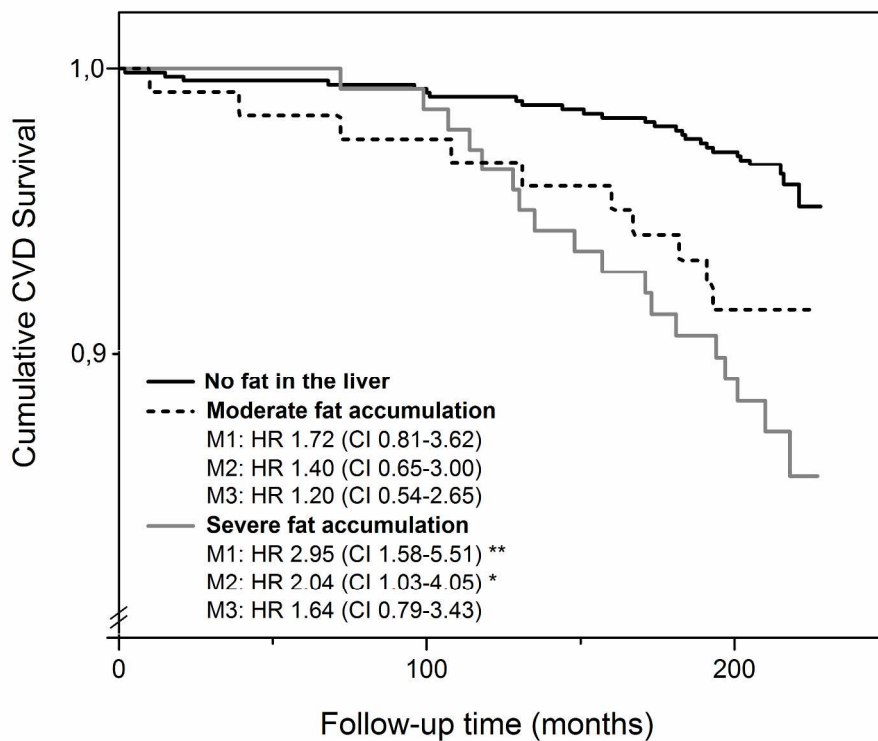

Kaplan Meier cumulative survival rates censored for cardiovascular death in subjects with no fat in the liver, moderate fat accumulation and severe fat accumulation.

CVD was the cause of death in 3.6% of the subjects (26/720) with non-fatty liver and 8.1% of the subjects (10/124) with moderate liver fat accumulation, while 12.5% of the subjects with severe fatty liver (18/144).

Cox regression analysis is used for adjustments. M1 (Model 1): adjusted for study group, age and gender.

M2 (Model 2): further adjustments for smoking, alcohol consumption, systolic blood pressure, LDL-cholesterol level and body mass index. M3 (Model 3): further adjustment for QUICKI. CVD, cardiovascular disease, CI, confidence interval, HR, hazard ratio, QUICKI, quantitative insulin sensitivity check index. \*\* p < 0.01, \* p < 0.05.

247x209mm (300 x 300 DPI)





## STROBE Statement

Strengthening the reporting of observational studies in epidemiology

### STROBE Statement—Items to be included when reporting observational studies in a conference abstract

| Item                | Recommendation                                                                                                                                                                                                                              |
|---------------------|---------------------------------------------------------------------------------------------------------------------------------------------------------------------------------------------------------------------------------------------|
| Title               | Indicate the study's design with a commonly used term in the title (e.g cohort, case-control, cross sectional)                                                                                                                              |
| Authors             | Contact details for the corresponding author                                                                                                                                                                                                |
| Study design        | Description of the study design (e.g cohort, case-control, cross sectional)                                                                                                                                                                 |
| Objective           | Specific objectives or hypothesis                                                                                                                                                                                                           |
| <b>Methods</b>      |                                                                                                                                                                                                                                             |
| Setting             | Description of setting, follow-up dates or dates at which the outcome events occurred or at which the outcomes were present, as well as any points or ranges on other time scales for the outcomes (e.g., prevalence at age 18, 1998-2007). |
| Participants        | <i>Cohort study</i> —Give the most important eligibility criteria, and the most important sources and methods of selection of participants. Describe briefly the methods of follow-up                                                       |
|                     | <i>Case-control study</i> —Give the major eligibility criteria, and the major sources and methods of case ascertainment and control selection                                                                                               |
|                     | <i>Cross-sectional study</i> —Give the eligibility criteria, and the major sources and methods of selection of participants                                                                                                                 |
| Variables           | <i>Cohort study</i> —For matched studies, give matching and number of exposed and unexposed                                                                                                                                                 |
|                     | <i>Case-control study</i> —For matched studies, give matching criteria and the number of controls per case                                                                                                                                  |
| Statistical methods | Clearly define primary outcome for this report.                                                                                                                                                                                             |
| Statistical methods | Describe statistical methods, including those used to control for confounding                                                                                                                                                               |
| <b>Results</b>      |                                                                                                                                                                                                                                             |
| Participants        | Report Number of participants at the beginning and end of the study                                                                                                                                                                         |
| Main results        | Report estimates of associations. If relevant, consider translating estimates of relative risk into absolute risk for a meaningful time period                                                                                              |
|                     | Report appropriate measures of variability and uncertainty (e.g., odds ratios with confidence intervals)                                                                                                                                    |
| Conclusions         | General interpretation of study results                                                                                                                                                                                                     |

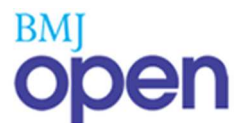

**Fatty liver predicts the risk for cardiovascular events in middle-aged population: a population-based cohort study**

|                                 |                                                                                                                                                                                                                                                                                                                                                                                          |
|---------------------------------|------------------------------------------------------------------------------------------------------------------------------------------------------------------------------------------------------------------------------------------------------------------------------------------------------------------------------------------------------------------------------------------|
| Journal:                        | <i>BMJ Open</i>                                                                                                                                                                                                                                                                                                                                                                          |
| Manuscript ID:                  | bmjopen-2014-004973                                                                                                                                                                                                                                                                                                                                                                      |
| Article Type:                   | Research                                                                                                                                                                                                                                                                                                                                                                                 |
| Date Submitted by the Author:   | 31-Jan-2014                                                                                                                                                                                                                                                                                                                                                                              |
| Complete List of Authors:       | Pisto, Pauliina; Clinical medicine, Internal medicine<br>Santaniemi, Merja; Institute of Clinical Medicine, Department of Internal Medicine<br>Bloigu, Risto; Medical Informatics and Statistics Research Group,<br>Ukkola, Olavi; Institute of Clinical Medicine, Department of Internal Medicine<br>Kesäniemi, Antero; Institute of Clinical Medicine, Department of Internal Medicine |
| <b>Primary Subject Heading</b>: | Diabetes and endocrinology                                                                                                                                                                                                                                                                                                                                                               |
| Secondary Subject Heading:      | Cardiovascular medicine                                                                                                                                                                                                                                                                                                                                                                  |
| Keywords:                       | Adult cardiology < CARDIOLOGY, Coronary heart disease < CARDIOLOGY, General diabetes < DIABETES & ENDOCRINOLOGY, Hepatology < INTERNAL MEDICINE                                                                                                                                                                                                                                          |
|                                 |                                                                                                                                                                                                                                                                                                                                                                                          |

SCHOLARONE™  
Manuscripts

only

1  
2  
3  
4 1 **Fatty liver predicts the risk for cardiovascular events in middle-aged population: a**  
5  
6 2 **population-based cohort study**  
7  
8

9 3 Pauliina Pisto<sup>1</sup>, Merja Santaniemi<sup>1</sup>, Risto Bloigu<sup>2</sup>, Olavi Ukkola<sup>1</sup>, Y. Antero Kesäniemi<sup>1</sup>  
10

11  
12 4 <sup>1</sup>Institute of Clinical Medicine, Department of Internal Medicine and Biocenter Oulu,  
13  
14 University of Oulu, and Clinical Research Center, Oulu University Hospital, Oulu, Finland,  
15  
16 P.O. Box 20, 90029 OYS, Finland  
17

18  
19  
20 7 <sup>2</sup>Medical Informatics and Statistics Research Group, University of Oulu, Aapistie 7, P.O. Box  
21  
22 8 5000, 90014 Oulu, Finland  
23  
24

25 9 **Contact information:** Pauliina Pisto, corresponding author  
26

27  
28  
29 10 University of Oulu  
30

31  
32 11 Institute of Clinical Medicine  
33

34  
35 12 Department of Internal medicine  
36

37  
38 13 P.O. Box 5000, 90014 Oulu, Finland  
39

40  
41 14 Tel.: +35885376310  
42

43  
44 15 Fax: +35885376318  
45

46  
47  
48 16 E-mail: pauliina.pisto@oulu.fi  
49

50  
51 17 **Word count:** 6093  
52

53 18 **Keywords:** coronary disease, fatty liver, insulin resistance, risk factors, stroke  
54

55 19 **Financial support:** This study was supported by the Finnish Foundation for Cardiovascular  
56  
57  
58 20 Research, dated 16 Apr, 2012.  
59  
60

1  
2  
3 21 **Disclosure summary:** Authors report no conflict of interests.  
4  
5  
6 22

7 23 **ABSTRACT**  
8

9  
10 24 **Objective:** We investigated if the differences in liver fat content would predict the  
11  
12 25 development of non-fatal and fatal atherosclerotic endpoints (coronary heart disease and  
13  
14 26 stroke).  
15

16 27 **Design, setting and participants:** Our study group is a population-based, randomly recruited  
17  
18 28 cohort (OPERA), initiated in 1991. The cohort consisted of 988 middle-aged Finnish subjects.  
19

20 29 **Intervention:** Total mortality and hospital events were followed up to 2009 based on the  
21  
22 30 registry of the National Institute for Health and Welfare and the National death registry.  
23

24 31 **Main outcome measure:** The severity of hepatic steatosis was measured by ultrasound and  
25  
26 32 divided into three groups (0-2). Cox regression analysis was used in the statistical analysis.  
27  
28

29 33 **Results:** In the follow-up of years 1991-2009, 13.5% of the subjects with non-fatty liver,  
30  
31 34 24.2% of subjects having moderate liver fat content and 29.2% of the subjects having severe  
32  
33 35 fatty liver experienced a cardiovascular event during the follow-up time ( $p < 0.001$ ). Severe  
34  
35 36 liver fat content predicted the risk for future risk of cardiovascular event even when adjusted  
36  
37 37 for age, gender and study group (HR 1.92, CI 1.32-2.80,  $p < 0.01$ ). When further adjustments  
38  
39 40 for smoking, alcohol consumption, LDL-cholesterol, BMI and systolic blood pressure were  
40  
41 42 conducted, the risk still remained statistically significant (HR 1.74, CI 1.16-2.63,  $p < 0.01$ ).  
42  
43 44 Statistical significance disappeared with further adjustment for QUICKI.  
44  
45

46 47 **Conclusions:** Liver fat content increases the risk of future cardiovascular disease event in  
47  
48 49 long-term follow-up but it seems to be dependent on insulin sensitivity.  
49  
50 52  
51  
52  
53  
54  
55  
56  
57  
58  
59  
60

1  
2  
3 46 **Article focus**  
4  
5

6 47 1 To investigate if the differences in liver fat content predict the risk for development of fatal  
7  
8 48 or nonfatal atherosclerotic endpoints such as coronary heart disease and stroke.  
9

10  
11 49 **Key messages**  
12  
13

14 50 1 Subjects with ultrasound-diagnosed fatty liver have cardiovascular disease more often  
15  
16 51 compared to the subjects without fat in the liver  
17

18  
19  
20 52 2 Severe liver fat content increases the risk of a future cardiovascular event and mortality to  
21  
22 53 cardiovascular disease over the long-term follow-up but it does seem to be dependent on  
23  
24 54 insulin sensitivity  
25  
26

27  
28 55 3 Severe fatty liver predicts the risk for overall mortality but the association is dependent on  
29  
30 56 traditional metabolic risk factors  
31  
32

33 57 **Strengths and limitations of the study**  
34  
35

36 58 1 This is a follow-up study with a large population-based study group and a very long follow-  
37  
38 59 up time  
39

40  
41  
42 60 2 Official registers used in event diagnoses - data is accurate and the classification is  
43  
44 61 systematic  
45  
46

47 62 3 Grade of liver brightness was measured by ultrasound, which has a high specificity but low  
48  
49 63 sensitivity  
50

51  
52 64

53  
54 65 **Introduction**  
55  
56  
57  
58  
59  
60

1  
2  
3 66 Non-alcoholic fatty liver disease (NAFLD) refers to liver disorders such as abnormal fat  
4  
5 67 content, which exists in a spectrum ranging from steatosis with no inflammation to non-  
6  
7 68 alcoholic steatohepatitis (NASH), which can ultimately lead to liver cirrhosis <sup>1</sup>. The  
8  
9 69 prevalence of NAFLD is estimated to range from 20 to 30% of population in Western  
10  
11 70 countries, being the leading cause of liver disorders <sup>2,3</sup>. It is associated with obesity, type 2  
12  
13 71 diabetes mellitus (T2DM) and hyperlipidemia <sup>1</sup>. NAFLD is commonly regarded as a hepatic  
14  
15 72 manifestation of the metabolic syndrome and both conditions share several risk factors for  
16  
17 73 cardiovascular disease (CVD) <sup>3,4</sup>.

20  
21  
22 74

23  
24  
25 75 In 2008, the prevalence of CVD in adults ( $\geq 20$  years) in United States was 36.2% <sup>5</sup>. Every  
26  
27 76 year, 4.3 million subjects die for CVD in Europe causing nearly half of the all deaths (48%) <sup>6</sup>.  
28  
29 77 So-called traditional risk factors for cardiovascular disease are age, gender, smoking, high  
30  
31 78 low-density lipoprotein (LDL) cholesterol concentration, hypertension and diabetes <sup>7</sup>. In  
32  
33 79 addition, total body fatness as well as abdominal fat accumulation increase independently the  
34  
35 80 risk of CVD and insulin resistance is regarded to be an important factor linking visceral  
36  
37 81 adiposity to cardiovascular risk <sup>8</sup>. Adipose tissue is now recognized as a significant endocrine  
38  
39 82 organ as adipocytes and macrophages infiltrating adipocytes secrete a number of bioactive  
40  
41 83 mediators <sup>7</sup>. Adipokines, proinflammatory cytokines and hypofibrinolytic markers may lead to  
42  
43 84 oxidative stress and endothelial dysfunction, finally leading to atherosclerosis <sup>9</sup>.

44  
45  
46  
47  
48 85

49  
50  
51 86 Hepatic steatosis has been discussed as a possible mechanism to explain CVD morbidity and  
52  
53 87 mortality <sup>10</sup>. NAFLD patients have been reported to have higher coronary heart disease (CHD)  
54  
55 88 risk than the general population of the same age and gender <sup>11</sup>. According to previous study,  
56  
57  
58  
59  
60

1  
2  
3  
4  
5  
6  
7  
8  
9  
10  
11  
12  
13  
14  
15  
16  
17  
18  
19  
20  
21  
22  
23  
24  
25  
26  
27  
28  
29  
30  
31  
32  
33  
34  
35  
36  
37  
38  
39  
40  
41  
42  
43  
44  
45  
46  
47  
48  
49  
50  
51  
52  
53  
54  
55  
56  
57  
58  
59  
60

89 liver dysfunction associated with CVD mortality in men<sup>12</sup> whereas another large study found  
90 no association between NAFLD and CVD in general population<sup>13</sup>. In addition, fatty liver did  
91 not predict CVD mortality and morbidity in patients with established coronary artery disease  
92<sup>14</sup>.

93

94 The NAFLD and CVD share several molecular mechanisms<sup>15,16</sup>. Fatty liver might play a part  
95 in the pathogenesis of CVD through the overexpression and systemic release of several  
96 inflammatory, hemostatic<sup>17</sup> and oxidative-stress mediators or via contributing to whole-body  
97 insulin resistance and atherogenic dyslipidemia<sup>3</sup>. NAFLD has also been reported to be linked  
98 with circulatory endothelial dysfunction<sup>4,14</sup>. Several investigators have reported that NAFLD  
99 is associated with coronary artery disease<sup>4,14</sup> and increased carotid intima-media thickness<sup>18</sup>,  
100<sup>19</sup>. Increased gamma-glutamyltransferase (GGT), which may be a marker of NAFLD, has  
101 been reported to be associated with stroke<sup>20</sup>.

102

103 It is known that subjects with fatty liver disease have an increased risk of suffering CVD<sup>4</sup>, but  
104 whether NAFLD is an independent indicator of cardiovascular disease is still far from clear.  
105 Long-term follow-up studies are needed to clarify the correlation between fatty liver and  
106 CVD. The aim of our study was to investigate if fatty liver could predict independently the  
107 risk for total mortality as well as non-fatal and fatal cardiovascular endpoints with a 19-year  
108 follow-up after adjusting for all known conventional risk factors.

109

110 **Materials and methods**



1  
2  
3 111 **Human subjects**  
4  
5

6 112 OPERA (Oulu Project Elucidating Risk of Atherosclerosis) is a population-based,  
7  
8 113 epidemiological prospective cohort study designed to address the risk factors and disease end  
9  
10 114 points of atherosclerotic cardiovascular diseases. Selection criteria of the study subjects have  
11  
12 115 been described earlier <sup>21</sup>. In short, a total of 520 men and 525 women participated: 259 control  
13  
14 116 men, 261 hypertensive men, 267 control women and 258 hypertensive women aged 40-59.  
15  
16 117 Hypertensive participants were randomly selected from the national register for  
17  
18 118 reimbursement of the costs of antihypertensive medication. For each hypertensive subject, an  
19  
20 119 age- and sex-matched control subject was randomly selected from the same register. Informed  
21  
22 120 consent in writing was obtained from each patient. The study protocol conformed to the  
23  
24 121 ethical guidelines of the 1975 Declaration of Helsinki and this study was approved by the  
25  
26 122 Ethical Committee of the Faculty of Medicine, University of Oulu.  
27  
28  
29  
30

31 123  
32  
33

34 124 **Determination of hepatic steatosis**  
35  
36

37  
38 125 The determination of hepatic steatosis was based on liver-kidney contrast <sup>22</sup> measured with  
39  
40 126 ultrasonography <sup>23</sup> by one trained radiologist with 10 years' experience in abdominal  
41  
42 127 ultrasound examinations. Normal liver parenchyma should be slightly more echogenic (brighter)  
43  
44 128 than the kidney parenchyma. In a case of increased liver echogenicity an ultrasound diagnosis of  
45  
46 129 bright liver was settled. The severity of hepatic steatosis was based on the brightness of the liver  
47  
48 130 and it was classified into three groups ranging from 0 to 2 (0 = normal bright, indicating a  
49  
50 131 non-fatty liver, 1 = medium bright, a moderate lipid content and 2 = clearly bright, a severe  
51  
52 132 lipid content and fatty liver) <sup>24</sup>.  
53  
54

55  
56 133  
57  
58  
59  
60

1  
2  
3 134 **Follow-up**  
4  
5

6 135 Both the hypertensive and the control men were recruited during December 1990 to May  
7  
8 136 1992 and the women approximately one year later (n=1045). In total, 1023 subjects had a  
9  
10 137 liver ultrasound result available at baseline. Mortality data were obtained from the National  
11  
12 138 Death Registry and the diagnoses of cardiovascular events were based on the registry of the  
13  
14 139 National Institute for Health and Welfare. The follow-up time ended December 31, 2009 or  
15  
16 140 whenever the first event occurred. Cardiovascular events included fatal and non-fatal  
17  
18 141 endpoints. Subjects with a previous hospital-diagnosed myocardial infarction or stroke (n=41)  
19  
20 142 at baseline were excluded. In total, 988 subjects participated in this part of the study.  
21  
22  
23  
24  
25

26 143

27  
28 144 CVD included a major CHD event and stroke (excluding subarachnoid hemorrhage, SAH) -  
29  
30 145 whichever of these happened first <sup>25</sup>. The evidence of CHD was based on the following  
31  
32 146 diagnosis: I20.0, I21, I22 [ICD-10, International Statistical Classification of Diseases and  
33  
34 147 Related Health Problems] / 410, 4110 [ICD-8/9] as the main diagnosis (symptom or cause)  
35  
36 148 and I21, I22 [ICD-10] / 410 [ICD-8/9] as a first side diagnosis (symptom or cause) or second  
37  
38 149 side diagnosis (symptom or cause) and third side diagnosis (ICD-8/9 only) or if a subject had  
39  
40 150 undergone coronary artery bypass graft (CABG) surgery or angioplasty. CHD as a cause of  
41  
42 151 death included I20–I25, I46, R96, R98 [ICD-10] / 410-414, 798 (not 7980A) [ICD-8/9] as the  
43  
44 152 underlying cause of death or immediate cause of death and I21 or I22 [ICD-10] / 410 [ICD-  
45  
46 153 8/9] as first to third contributing cause of death. Stroke (excluding SAH) included I61, I63  
47  
48 154 (not I636), I64 [ICD -10] / 431, 4330A, 4331A, 4339A, 4340A, 4341A, 4349A, 436 [ICD-9] /  
49  
50 155 431 (except 43101, 43191) 433, 434, 436 [ICD-8] as main diagnosis (symptom or cause) or as  
51  
52 156 a first or second side diagnosis (symptom or cause) or as a third side diagnosis (ICD-8/9 only)  
53  
54  
55  
56  
57  
58  
59  
60

1  
2  
3 157 or as an underlying cause of death or immediate cause of death or as a first to third  
4  
5 158 contributing cause of death <sup>26</sup>.

6  
7  
8 159

9  
10  
11 160 **Laboratory analyses**

12  
13  
14 161 Waist circumference, body mass index (BMI) and blood pressure were measured as described  
15  
16 162 in previous study <sup>21</sup>.

17  
18  
19  
20 163

21  
22  
23 164 All the laboratory test samples were obtained after an overnight fast. Blood insulin and  
24  
25 165 glucose concentrations were analyzed at 0, 60, and 120 min after administration of 75 g  
26  
27 166 glucose <sup>24</sup>. Insulin sensitivity was assessed using fasting plasma insulin concentrations and a  
28  
29 167 quantitative insulin sensitivity check index (QUICKI) {QUICKI=1/[log (fasting insulin)+log  
30  
31 168 (fasting glucose)]} <sup>27</sup>.

32  
33  
34  
35 169

36  
37  
38 170 Very-low-density lipoprotein (VLDL), high-density lipoprotein (HDL), low-density  
39  
40 171 lipoprotein (LDL) and hs-CRP concentrations <sup>24</sup> as well as alanine aminotransferase (ALT)  
41  
42 172 and GGT levels were measured as described previously <sup>23</sup>. Alcohol consumption and smoking  
43  
44 173 history were determined by validated questionnaires <sup>28</sup>. Alcohol consumption was divided into  
45  
46 174 three groups: 0 (n=161) mean alcohol consumption less than 1g/week in men and women, 1  
47  
48 175 (n=767) mean consumption less than 210g/week in men and less than 140 g/week in women,  
49  
50 176 2 (n=76) mean alcohol consumption more than 210g/week in men and more than 140g/week  
51  
52  
53 177 in women. Group 2 designates large-scale alcohol consumers according to the guidelines <sup>29</sup>.

54  
55  
56  
57 178  
58  
59  
60

1  
2  
3 179 **Statistical analysis**  
4  
5

6 180 Statistical analysis was performed by using IBM SPSS Statistics for Windows, Version 20.0  
7  
8 181 (Armonk, NY: IBM Corp.). Analysis of variance was used to compare the means of the  
9  
10 182 variables measured. Post hoc tests were performed using the Tukey method. Statistical  
11  
12 183 significances between percentages were measured by using  $\chi^2$  test. Cumulative survival rates  
13  
14 184 were estimated using Kaplan-Meier method. Cox regression analysis was performed to  
15  
16 185 investigate if liver brightness (fat) could predict the future risk for total mortality,  
17  
18 186 cardiovascular death or hospital events. A p value < 0.05 was regarded as significant.  
19  
20  
21

22 187  
23  
24

25 188 Skewed variables (smoking, alcohol consumption, fasting insulin, fasting glucose,  
26  
27 189 triglyceride, ALT, GGT concentration, hs-CRP level) were logarithmically transformed to  
28  
29 190 improve normality before analysis of variance. We used three models with progressive  
30  
31 191 degrees of adjustments. Model 1 included study group (subjects with medicine-treated  
32  
33 192 hypertension and their age- and sex-matched controls), age and gender. Model 2 included  
34  
35 193 further adjustments for smoking, alcohol consumption, systolic blood pressure, LDL-  
36  
37 194 cholesterol level and body mass index. Model 3 included further adjustment for QUICKI. We  
38  
39 195 carried out sensitivity analyses: in the analyses of cardiovascular events, we added all  
40  
41 196 covariates one by one and investigated if the hazard ratios (HR) changed or remained stable  
42  
43 197 when further adjustment with one covariate was performed. Model 4 included variables which  
44  
45 198 were stable and were statistically significant in intermediate phases. Model 5 included stable  
46  
47 199 and significant covariates without QUICKI (Table 2).  
48  
49  
50  
51

52  
53 200  
54  
55  
56  
57  
58  
59  
60

1  
2  
3 201 C-index was calculated for the model 1, model 3, model 4 and model 5 to assess the  
4  
5 202 discrimination of the risk markers. The analyses were performed in 250 bootstrap resamplings  
6  
7 203 to obtain 95% CI for c-index of each model.  
8  
9  
10  
11 204

## 13 205 **Results**

16 206 The main baseline characteristics of the study group are shown in Table 1.  
17  
18  
19  
20 207

22  
23 208 *Table 1 about here*  
24  
25  
26 209

### 28 209 29 210 **Incidence of cardiovascular disease**

31  
32 211 The median follow-up time was 212 (maximum 228) months. During the follow-up time,  
33  
34 212 13.5% of the subjects with no fat in the liver (97/720), 24.2% (30/124) of subjects having  
35  
36 213 moderate liver fat content and 29.2% (42/144) of the subjects having severe fatty liver  
37  
38 214 experienced a CVD event ( $p < 0.001$ ). CVD was the cause of death in 3.6% of the subjects  
39  
40 215 with non-fatty liver (26/720) and 8.1% of the subjects with moderate liver fat content  
41  
42 216 (10/124), while 12.5% (18/144) of the subjects with severe fatty liver ( $p < 0.001$ ) (Table 3).  
43  
44  
45  
46  
47 217

48  
49  
50 218 Severe liver fat content predicted the risk for future risk of cardiovascular event when  
51  
52 219 adjusted for age, gender and study group (Model 1: HR 1.92, CI 1.32-2.80,  $p < 0.01$ ) (Table  
53  
54 220 2). When further adjustments were made for smoking, alcohol consumption, LDL-cholesterol,  
55  
56 221 BMI and systolic blood pressure (Model 2: HR 1.74, CI 1.16-2.63), the risk still remained  
57  
58  
59  
60

1  
2  
3 222 statistically significant ( $p < 0.01$ ). Statistical significance disappeared when further  
4  
5 223 adjustment for QUICKI was performed (Model 3: HR 1.49, CI 0.97-2.30,  $p=0.071$ ). In the  
6  
7 224 CVD event sensitivity analyses, all covariates were added one by one and it was examined  
8  
9 225 whether the hazard ratios would change or remain stable. After adjusting for the statistically  
10  
11 226 significant variables (including quick index) in the sensitivity analyses, the association  
12  
13  
14 227 between severe fatty liver was no longer significant (Model 4: HR 1.43, CI 0.93-2.18,  
15  
16 228  $p=0.10$ ). When QUICKI was not added into Model 5, severe fatty liver did predict the risk for  
17  
18 229 future risk for CVD event (HR 1.76, CI 1.21- 2.56,  $p < 0.001$ ) (Table 2). The c-index  
19  
20 230 decreased when the risk factors were removed from the model (Table 4).  
21  
22  
23  
24 231  
25  
26  
27 232 *Tables 2, 3 and 4 about here*  
28  
29  
30 233  
31  
32  
33 234 The future risk of death from CVD in participants with severe fat content was significant  
34  
35 235 when age, gender and study group were added as covariates (Model 1: HR 2.95, CI 1.58-5.51,  
36  
37 236  $p < 0.01$ ). Even after further adjustments with other conventional risk factors (Model 2: HR  
38  
39 237 2.04, CI 1.03-4.05), statistical significance remained ( $p < 0.05$ ). When QUICKI was added as  
40  
41 238 the covariate, then significance disappeared (Model 3: HR 1.64, CI 0.79-3.43, NS) (Fig 1.).  
42  
43  
44  
45 239  
46  
47  
48  
49 240 *Figure 1 about here*  
50  
51  
52 241  
53  
54  
55 242 **Fatty liver and total mortality**  
56  
57  
58  
59  
60

1  
2  
3 243 In total, 11.9% of the participants not having fatty liver, 18.5% of the subjects having  
4  
5 244 moderate fatty liver and 22.2% of the subjects with severe fatty liver died from all causes ( $p <$   
6  
7 245 0.01). According to Model 1, severe fat content predicted the risk for mortality from all  
8  
9 246 causes when age, gender and study group were added as covariates (HR 1.60, CI 1.05-2.43,  $p$   
10  
11 247  $< 0.05$ ). The significance disappeared when body mass index was added as a covariate (data  
12  
13 248 not shown).

14  
15  
16  
17 249

18  
19  
20 250 We performed all Cox regression analyses after excluding the men consuming more than 210  
21  
22 251 g alcohol and the women drinking more than 140 g alcohol per week. This exclusion did not  
23  
24 252 have any effect on the results (data not shown).

25  
26  
27  
28 253 We performed all Cox regression analyses after excluding patients with insulin treated  
29  
30 254 diabetes mellitus ( $n=9$ ), cortisone treatment at baseline ( $n=41$ ) and previous diagnosis for  
31  
32 255 liver disease ( $n=15$ ) (e.g., virus, medications). This exclusion did not have any effect on the  
33  
34 256 results (data not shown).

## 35 36 37 38 257 **Discussion**

39  
40  
41 258 The incidences of non-alcoholic fatty liver disease and cardiovascular disease are  
42  
43 259 continuously increasing in the Western world. The question if NAFLD is only a marker or  
44  
45 260 also an early mediator of cardiovascular disease is still largely unanswered. According to the  
46  
47 261 results of the present study, which had an approximately 19-year follow-up fatty liver does  
48  
49 262 predict the future risk for death from all causes, death from cardiovascular disease and risk of  
50  
51 263 cardiovascular events. Insulin sensitivity seems to play a more dominant role in the  
52  
53 264 development of cardiovascular events.

54  
55  
56  
57 265  
58  
59  
60

1  
2  
3 266 Only a few studies have investigated the risk for future cardiovascular risk among subjects  
4  
5 267 with ultrasound-diagnosed fatty liver<sup>30, 31</sup> and larger studies with longer follow-up times are  
6  
7 268 needed. An association between NAFLD and CVD has been reported<sup>3, 30-32</sup> although contrary  
8  
9 269 results also exist<sup>13, 33</sup>. A previous large population-based prospective cohort study found no  
10  
11 270 association between NAFLD and CVD, however they categorized the degree of steatosis as a  
12  
13  
14 271 two level variable: none to mild and moderate to severe<sup>13</sup>. An association between  
15  
16 272 ultrasound-diagnosed fatty liver and CVD has been reported in general population<sup>30</sup> and in  
17  
18 273 subjects with T2DM<sup>32</sup>. Furthermore, liver dysfunction has been reported to associate with  
19  
20  
21 274 CVD mortality<sup>34, 35</sup> and CHD risk<sup>11</sup> in follow-up studies and especially survival of subjects  
22  
23 275 with NASH is reported to be reduced<sup>33, 36, 37</sup>. In the present study, severe fatty liver disease did  
24  
25 276 predict the risk for cardiovascular death but the association seemed to be dependent on insulin  
26  
27 277 sensitivity.

28  
29  
30 278

31  
32 279 Several earlier studies have used self-reported CVD history which may not be totally reliable.  
33  
34 280 Although earlier studies on the risk for future cardiovascular risk among subjects with fatty  
35  
36 281 liver have performed some adjustments, the full range of well-known CVD risk factors have  
37  
38 282 been rarely considered<sup>33</sup>. We have performed adjustments with all so-called traditional risk  
39  
40 283 factors for cardiovascular disease (i.e. age, gender, smoking, LDL concentration,  
41  
42 284 hypertension, insulin resistance). Previous studies have used biochemical, radiological and  
43  
44 285 histological methodology for NAFLD diagnosis and staging, which leads to a challenging  
45  
46 286 interpretation of the results<sup>35, 38</sup>.

47  
48  
49  
50  
51 287

52  
53  
54 288 This study had an approximately 19-year follow-up time, which is longer than in previous  
55  
56 289 studies<sup>11-14</sup>. When compared to earlier studies<sup>33, 38</sup> this study seems to be the first follow-up  
57  
58  
59  
60



1  
2  
3 290 study with a large population-based randomly selected study group and a very long follow-up  
4  
5 291 time and ultrasound-diagnosed fatty liver. The diagnosis of cardiovascular events was based  
6  
7 292 on the registry of the National Institute for Health and Welfare and mortality data were  
8  
9 293 obtained from the National Death Registry. The earlier verified FINRISK classification <sup>26</sup> was  
10  
11 294 used to classify the events. Therefore, the reliability of event diagnosis data is accurate and  
12  
13 295 the classification is systematic. All subjects who had myocardial infarction or stroke before  
14  
15 296 baseline were excluded because a history of myocardial infarction is known to increase the  
16  
17 297 risk for recurrent myocardial infarction or cardiovascular death <sup>39</sup> and medication as well as  
18  
19 298 lifestyle secondary prevention strategies are intensive <sup>40</sup>.

22  
23  
24 299

25  
26  
27 300 There are a few follow-up-studies examining whether the fatty liver increases the risk for total  
28  
29 301 mortality <sup>13, 41</sup>. In the present study, severe fatty liver predicted the risk for overall mortality of  
30  
31 302 any causes when age, gender and study group were added covariates, a result in line with an  
32  
33 303 earlier report <sup>42</sup>. In the published literature, NASH rather than simple steatosis has been stated  
34  
35 304 to be linked with decreased overall survival <sup>36</sup> although one study with a large cohort found no  
36  
37 305 association between NAFLD and overall mortality <sup>13</sup>. In our study, the association between  
38  
39 306 severe fatty liver and total mortality disappeared after further adjustment for BMI which  
40  
41 307 means that severe fatty liver is not a strong predictor for overall mortality.

42  
43  
44  
45  
46 308

47  
48  
49 309 The molecular mechanisms linking fatty liver with CVD have been investigated <sup>10, 16</sup>.  
50  
51 310 Enlarged visceral adipose tissue may explain why NAFLD associates with CVD <sup>16</sup>. In  
52  
53 311 individuals with visceral obesity, insulin resistance may contribute to impaired non-esterified  
54  
55 312 fatty acid (NEFA) metabolism <sup>8</sup> and the increasing NEFA flux to the liver may impair liver

1  
2  
3 313 metabolism leading to increased glucose metabolism and liver dysfunction <sup>7</sup>. The liver is one  
4  
5 314 of the targets of the resulting systemic abnormalities and the source of several proatherogenic  
6  
7 315 factors <sup>3</sup>, such as CRP, fibrinogen, plasminogen activator inhibitor-1 and other inflammatory  
8  
9 316 cytokines <sup>16</sup>. Furthermore, visceral adipose tissue and ectopic fat overexpress factors involved  
10  
11 317 in atherogenesis <sup>16</sup> such as NEFAs and proinflammatory cytokines, for instance interleukin-6  
12  
13 318 and tumor necrosis factor- $\alpha$  <sup>8</sup> leading to chronic systemic inflammation. In addition, hepatic  
14  
15 319 steatosis leads to overproduction of cholesterol-rich remnant particles <sup>4</sup>.  
16  
17  
18  
19  
20

21 320

22 321 One limitation in this study is that the grade of liver brightness was measured by ultrasound.  
23  
24 322 The invasive diagnostic technique of liver biopsy is regarded as the “golden standard”,  
25  
26 323 especially for the diagnosis of NASH <sup>43</sup>. Real time ultrasound using a combination of  
27  
28 324 sonographic findings does have a high specificity but it underestimates the prevalence of  
29  
30 325 hepatic steatosis when there is less than 20 % fat <sup>44</sup>. Today, magnetic resonance spectroscopy  
31  
32 326 is regarded as the best method for the quantification of liver fat, but this method is limited due  
33  
34 327 to its availability <sup>45</sup>. Nonetheless, the noninvasive ultrasound method was chosen because  
35  
36 328 taking liver biopsies from large groups of symptomless subjects would have been ethically  
37  
38 329 unjustifiable and magnetic resonance spectroscopy was not available at the baseline.  
39  
40  
41  
42

43 330

44  
45  
46 331 The OPERA study group consists of subjects with drug-treated hypertension and randomly  
47  
48 332 selected sex- and age-matched controls. Study group was added as a covariate to minimize  
49  
50 333 any selection bias.  
51

52  
53 334 **Conclusions**  
54  
55  
56  
57  
58  
59  
60

1  
2  
3 335 Severe liver fat content increased the risk of a future cardiovascular event and mortality to  
4  
5 336 cardiovascular disease over the long-term follow-up but it seemed to be dependent on insulin  
6  
7 337 sensitivity. Fatty liver also predicted the risk for overall mortality. However, conventional  
8  
9 338 cardiovascular disease risk factors seemed to play a major role in developing death from all  
10  
11 339 causes. It would be beneficial to investigate larger cohorts and follow-up studies in order to  
12  
13 340 validate this result.  
14  
15  
16  
17  
18  
19

20  
21 341

### 22 342 **Figure legend**

23  
24 343 Title: Kaplan Meier cumulative survival rates censored for cardiovascular death in subjects  
25  
26 344 with no fat in the liver, moderate fat content and severe fat content.  
27

28  
29 345 CVD was the cause of death in 3.6% of the subjects (26/720) with non-fatty liver and 8.1%  
30  
31 346 of the subjects (10/124) with moderate liver fat content, while 12.5% of the subjects with  
32  
33 347 severe fatty liver (18/144). Cox regression analysis is used for adjustments. M1 (Model 1):  
34  
35 348 adjusted for study group, age and gender. M2 (Model 2): further adjustments for smoking,  
36  
37 349 alcohol consumption, systolic blood pressure, LDL-cholesterol level and body mass index.  
38  
39 350 M3 (Model 3): further adjustment for QUICKI. CVD, cardiovascular disease, CI, confidence  
40  
41 351 interval, HR, hazard ratio, QUICKI, quantitative insulin sensitivity check index. \*\*  $p < 0.01$ ,  
42  
43 352 \*  $p < 0.05$ .  
44  
45  
46  
47

48 353

### 49 354 **Acknowledgements**

50  
51  
52  
53  
54 355 The authors thank Markku Päivänsalo, MD, PhD, for the expert liver ultrasound examinations  
55  
56 356 and Ms Saija Kortetjärvi, Ms Liisa Mannermaa, and Ms Leena Ukkola for the excellent  
57  
58  
59  
60

1  
2  
3 357 technical assistance. M.Sc. Elina Malo and M.Sc. Meiju Saukko are thanked for the  
4  
5 358 cooperation in organizing cardiovascular event and mortality data.  
6  
7

8  
9 359

10  
11  
12 360 **Contributor statement:** All authors fulfill all three of the ICMJE guidelines for authorship  
13

14  
15 361 **Pauliina Pisto:** Data acquisition, statistical analysis and interpretation of data, manuscript  
16  
17 362 writing, final approval of the version to be published  
18  
19

20  
21 363 **Merja Santaniemi:** Data acquisition, statistical analysis and data interpretation, critical  
22  
23 364 revision of the manuscript, final approval of the version to be published  
24  
25

26 365 **Risto Bloigu:** Data analysis, interpretation of data, critical revision of the manuscript, final  
27  
28 366 approval of the version to be published  
29  
30

31  
32 367 **Olavi Ukkola:** Study design, data acquisition, data interpretation, critical revision of the  
33  
34 368 manuscript, final approval of the version to be published  
35  
36

37 369 **Y.A Kesäniemi:** Study design, data acquisition, data interpretation, critical revision of the  
38  
39 370 manuscript, final approval of the version to be published  
40  
41

42  
43 371

44  
45  
46 372 **Data sharing statement:** Extra data is available by emailing pauliina.pisto(at)oulu.fi  
47  
48

49  
50 373 **Competing Interests:** None  
51  
52

53 374  
54  
55

56 375  
57  
58  
59  
60

1  
2  
3 376 **References**  
4  
5

6 377 **1. Angulo P. Nonalcoholic fatty liver disease. *N Engl J Med* 2002; Apr 18;346(16):1221-**  
7  
8 378 **31.**

9  
10  
11 379 **2. Armstrong MJ, Houlihan DD, Bentham L, Shaw JC, Cramb R, Olliff S, et al.**  
12 **Presence and severity of non-alcoholic fatty liver disease in a large prospective primary**  
13 **care cohort. *J Hepatol* 2012; Jan;56(1):234-40.**  
14  
15  
16  
17

18  
19  
20 382 **3. Targher G, Day CP, Bonora E. Risk of cardiovascular disease in patients with**  
21 **nonalcoholic fatty liver disease. *N Engl J Med* 2010; Sep 30;363(14):1341-50.**  
22  
23

24  
25 384 **4. Targher G, Arcaro G. Non-alcoholic fatty liver disease and increased risk of**  
26 **cardiovascular disease. *Atherosclerosis* 2007; Apr;191(2):235-40.**  
27  
28

29  
30  
31 386 **5. Roger VL, Go AS, Lloyd-Jones DM, Adams RJ, Berry JD, Brown TM, et al. Heart**  
32 **disease and stroke statistics--2011 update: a report from the American Heart**  
33 **Association. *Circulation* 2011; Feb 1;123(4):e18-e209.**  
34  
35  
36

37  
38  
39 389 **6. Allender S, Scarborough P, Peto V, Rayner M, Leal J, Luengo-Fernandez R, Gray A.**  
40 **European cardiovascular disease statistics, 2008 ed. European Heart Network; 2008.**  
41  
42

43  
44 391 **7. Despres JP, Lemieux I. Abdominal obesity and metabolic syndrome. *Nature* 2006; Dec**  
45 **14;444(7121):881-7.**  
46  
47

48  
49  
50 393 **8. Van Gaal LF, Mertens IL, De Block CE. Mechanisms linking obesity with**  
51 **cardiovascular disease. *Nature* 2006; Dec 14;444(7121):875-80.**  
52  
53

54  
55 395 **9. Hansson GK. Inflammation, atherosclerosis, and coronary artery disease. *N Engl J***  
56 ***Med* 2005; Apr 21;352(16):1685-95.**  
57  
58  
59  
60

- 1  
2  
3 397 **10. Bhatia LS, Curzen NP, Byrne CD. Nonalcoholic fatty liver disease and vascular risk.**  
4  
5 398 ***Curr Opin Cardiol* 2012; Jul;27(4):420-8.**  
6  
7  
8  
9 399 **11. Treeprasertsuk S, Leverage S, Adams LA, Lindor KD, St Sauver J, Angulo P. The**  
10  
11 400 **Framingham risk score and heart disease in nonalcoholic fatty liver disease. *Liver Int***  
12  
13 401 **2012; Jul;32(6):945-50.**  
14  
15  
16 402 **12. Haring R, Wallaschofski H, Nauck M, Dorr M, Baumeister SE, Volzke H.**  
17  
18 403 **Ultrasonographic hepatic steatosis increases prediction of mortality risk from elevated**  
19  
20 404 **serum gamma-glutamyl transpeptidase levels. *Hepatology* 2009; Nov;50(5):1403-11.**  
21  
22  
23  
24 405 **13. Lazo M, Hernaez R, Bonekamp S, Kamel IR, Brancati FL, Guallar E, et al. Non-**  
25  
26 406 **alcoholic fatty liver disease and mortality among US adults: prospective cohort study.**  
27  
28 407 ***BMJ* 2011; Nov 18;343:d6891.**  
29  
30  
31  
32 408 **14. Wong VW, Wong GL, Yip GW, Lo AO, Limquiaco J, Chu WC, et al. Coronary**  
33  
34 409 **artery disease and cardiovascular outcomes in patients with non-alcoholic fatty liver**  
35  
36 410 **disease. *Gut* 2011; Dec;60(12):1721-7.**  
37  
38  
39  
40 411 **15. Loria P, Lonardo A, Targher G. Is liver fat detrimental to vessels?: intersections in**  
41  
42 412 **the pathogenesis of NAFLD and atherosclerosis. *Clin Sci (Lond)* 2008; Jul;115(1):1-12.**  
43  
44  
45 413 **16. Targher G, Marra F, Marchesini G. Increased risk of cardiovascular disease in non-**  
46  
47 414 **alcoholic fatty liver disease: causal effect or epiphenomenon?. *Diabetologia* 2008;**  
48  
49 415 **Nov;51(11):1947-53.**  
50  
51  
52  
53 416 **17. Targher G, Bertolini L, Scala L, Zoppini G, Zenari L, Falezza G. Non-alcoholic**  
54  
55 417 **hepatic steatosis and its relation to increased plasma biomarkers of inflammation and**  
56  
57  
58  
59  
60

1  
2  
3 418 endothelial dysfunction in non-diabetic men. Role of visceral adipose tissue. *Diabet Med*  
4  
5 419 2005; Oct;22(10):1354-8.  
6  
7

8  
9 420 18. Brea A, Mosquera D, Martin E, Arizti A, Cordero JL, Ros E. Nonalcoholic fatty  
10  
11 421 liver disease is associated with carotid atherosclerosis: a case-control study. *Arterioscler*  
12  
13 422 *Thromb Vasc Biol* 2005; May;25(5):1045-50.  
14

15  
16 423 19. Sookoian S, Pirola CJ. Non-alcoholic fatty liver disease is strongly associated with  
17  
18 424 carotid atherosclerosis: a systematic review. *J Hepatol* 2008; Oct;49(4):600-7.  
19

20  
21  
22 425 20. Fraser A, Harris R, Sattar N, Ebrahim S, Smith GD, Lawlor DA. Gamma-  
23  
24 426 glutamyltransferase is associated with incident vascular events independently of alcohol  
25  
26 427 intake: analysis of the British Women's Heart and Health Study and Meta-Analysis.  
27  
28 428 *Arterioscler Thromb Vasc Biol* 2007; Dec;27(12):2729-35.  
29

30  
31  
32 429 21. Rantala AO, Kauma H, Lilja M, Savolainen MJ, Reunanen A, Kesaniemi YA.  
33  
34 430 Prevalence of the metabolic syndrome in drug-treated hypertensive patients and control  
35  
36 431 subjects. *J Intern Med* 1999; Feb;245(2):163-74.  
37

38  
39  
40 432 22. Yajima Y, Ohta K, Narui T, Abe R, Suzuki H, Ohtsuki M. Ultrasonographical  
41  
42 433 diagnosis of fatty liver: significance of the liver-kidney contrast. *Tohoku J Exp Med*  
43  
44 434 1983; Jan;139(1):43-50.  
45

46  
47 435 23. Sampi M, Veneskoski M, Ukkola O, Kesaniemi YA, Horkko S. High plasma  
48  
49 436 immunoglobulin (Ig) A and low IgG antibody titers to oxidized low-density lipoprotein  
50  
51 437 are associated with markers of glucose metabolism. *J Clin Endocrinol Metab* 2010;  
52  
53 438 May;95(5):2467-75.  
54  
55  
56  
57  
58  
59  
60

- 1  
2  
3 439 24. Pisto P, Ukkola O, Santaniemi M, Kesaniemi YA. Plasma adiponectin--an  
4  
5 440 independent indicator of liver fat accumulation. *Metabolism* 2011; Nov;60(11):1515-20.  
6  
7  
8  
9 441 25. Santaniemi M., Ukkola O., Malo E., Bloigu R., Kesaniemi YA. Metabolic syndrome  
10  
11 442 in the prediction of cardiovascular events: The potential additive role of hsCRP and  
12  
13 443 adiponectin. *Eur J Prev Cardiol* 2013; Jun;20.  
14  
15  
16 444 26. Pajunen P, Jousilahti P, Borodulin K, Harald K, Tuomilehto J, Salomaa V. Body fat  
17  
18 445 measured by a near-infrared interactance device as a predictor of cardiovascular  
19  
20 446 events: the FINRISK'92 cohort. *Obesity (Silver Spring)* 2011; Apr;19(4):848-52.  
21  
22  
23  
24 447 27. Katz A, Nambi SS, Mather K, Baron AD, Follmann DA, Sullivan G, et al.  
25  
26 448 Quantitative insulin sensitivity check index: a simple, accurate method for assessing  
27  
28 449 insulin sensitivity in humans. *J Clin Endocrinol Metab* 2000; Jul;85(7):2402-10.  
29  
30  
31  
32 450 28. Kauma H, Savolainen MJ, Rantala AO, Lilja M, Kervinen K, Reunanen A, et al.  
33  
34 451 Apolipoprotein E phenotype determines the effect of alcohol on blood pressure in  
35  
36 452 middle-aged men. *Am J Hypertens* 1998; Nov;11(11 Pt 1):1334-43.  
37  
38  
39  
40 453 29. Bessebinders K, Wielders J, van de Wiel A. Severe hypertriglyceridemia  
41  
42 454 influenced by alcohol (SHIBA). *Alcohol Alcohol* 2011; Mar-Apr;46(2):113-6.  
43  
44  
45 455 30. Hamaguchi M, Kojima T, Takeda N, Nagata C, Takeda J, Sarui H, et al.  
46  
47 456 Nonalcoholic fatty liver disease is a novel predictor of cardiovascular disease. *World J*  
48  
49 457 *Gastroenterol* 2007; Mar 14;13(10):1579-84.  
50  
51  
52  
53 458 31. Stepanova M, Younossi ZM. Independent Association Between Nonalcoholic Fatty  
54  
55 459 Liver Disease and Cardiovascular Disease in the US Population. *Clin Gastroenterol*  
56  
57 460 *Hepatol* 2012; Jun;10(6):646-50.  
58  
59  
60



- 1  
2  
3 461 32. Targher G, Bertolini L, Poli F, Rodella S, Scala L, Tessari R, et al. Nonalcoholic fatty  
4  
5 462 liver disease and risk of future cardiovascular events among type 2 diabetic patients.  
6  
7 463 *Diabetes* 2005; Dec;54(12):3541-6.  
8  
9  
10  
11 464 33. Ghouri N, Preiss D, Sattar N. Liver enzymes, nonalcoholic fatty liver disease, and  
12  
13 465 incident cardiovascular disease: a narrative review and clinical perspective of  
14  
15 466 prospective data. *Hepatology* 2010; Sep;52(3):1156-61.  
16  
17  
18 467 34. Dunn W, Xu R, Wingard DL, Rogers C, Angulo P, Younossi ZM, et al. Suspected  
19  
20 468 nonalcoholic fatty liver disease and mortality risk in a population-based cohort study.  
21  
22 469 *Am J Gastroenterol* 2008; Sep;103(9):2263-71.  
23  
24  
25  
26 470 35. Ruttman E, Brant LJ, Concin H, Diem G, Rapp K, Ulmer H, et al. Gamma-  
27  
28 471 glutamyltransferase as a risk factor for cardiovascular disease mortality: an  
29  
30 472 epidemiological investigation in a cohort of 163,944 Austrian adults. *Circulation* 2005;  
31  
32 473 Oct 4;112(14):2130-7.  
33  
34  
35  
36 474 36. Soderberg C, Stal P, Askling J, Glaumann H, Lindberg G, Marmur J, et al.  
37  
38 475 Decreased survival of subjects with elevated liver function tests during a 28-year follow-  
39  
40 476 up. *Hepatology* 2010; Feb;51(2):595-602.  
41  
42  
43  
44 477 37. Ekstedt M, Franzen LE, Mathiesen UL, Thorelius L, Holmqvist M, Bodemar G, et  
45  
46 478 al. Long-term follow-up of patients with NAFLD and elevated liver enzymes. *Hepatology*  
47  
48 479 2006; Oct;44(4):865-73.  
49  
50  
51  
52 480 38. Bhatia LS, Curzen NP, Calder PC, Byrne CD. Non-alcoholic fatty liver disease: a  
53  
54 481 new and important cardiovascular risk factor?. *Eur Heart J* 2012; May;33(10):1190-200.  
55  
56  
57  
58  
59  
60

- 1  
2  
3 482 39. Beckman JA, Creager MA, Libby P. Diabetes and atherosclerosis: epidemiology,  
4  
5 483 pathophysiology, and management. *JAMA* 2002; May 15;287(19):2570-81.  
6  
7  
8  
9 484 40. Joseph P, Teo K. Optimal medical therapy, lifestyle intervention, and secondary  
10  
11 485 prevention strategies for cardiovascular event reduction in ischemic heart disease. *Curr*  
12  
13 486 *Cardiol Rep* 2011; Aug;13(4):287-95.  
14  
15  
16 487 41. Dam-Larsen S, Franzmann M, Andersen IB, Christoffersen P, Jensen LB, Sorensen  
17  
18 488 TI, et al. Long term prognosis of fatty liver: risk of chronic liver disease and death. *Gut*  
19  
20 489 2004; May;53(5):750-5.  
21  
22  
23  
24 490 42. Calori G, Lattuada G, Ragona F, Garancini MP, Crosignani P, Villa M, et al. Fatty  
25  
26 491 liver index and mortality: the Cremona study in the 15th year of follow-up. *Hepatology*  
27  
28 492 2011; Jul;54(1):145-52.  
29  
30  
31  
32 493 43. Joy D, Thava VR, Scott BB. Diagnosis of fatty liver disease: is biopsy necessary?. *Eur*  
33  
34 494 *J Gastroenterol Hepatol* 2003; May;15(5):539-43.  
35  
36  
37  
38 495 44. Dasarathy S, Dasarathy J, Khiyami A, Joseph R, Lopez R, McCullough AJ. Validity  
39  
40 496 of real time ultrasound in the diagnosis of hepatic steatosis: a prospective study. *J*  
41  
42 497 *Hepatol* 2009; Dec;51(6):1061-7.  
43  
44  
45 498 45. Szczepaniak LS, Nurenberg P, Leonard D, Browning JD, Reingold JS, Grundy S, et  
46  
47 499 al. Magnetic resonance spectroscopy to measure hepatic triglyceride content: prevalence  
48  
49 500 of hepatic steatosis in the general population. *Am J Physiol Endocrinol Metab* 2005;  
50  
51 501 Feb;288(2):E462-8.  
52  
53  
54  
55 502  
56  
57  
58  
59  
60

503

| <b>Grade of liver<br/>bightness</b>         | <b>0<br/>(n=720)</b> | <b>1<br/>(n=124)</b> | <b>2<br/>(n=144)</b> | <b>p</b> | <b>p</b>     | <b>p</b>     | <b>p</b>     |
|---------------------------------------------|----------------------|----------------------|----------------------|----------|--------------|--------------|--------------|
|                                             |                      |                      |                      |          | <b>(0-1)</b> | <b>(1-2)</b> | <b>(0-2)</b> |
| <b>Age (years)</b>                          | 50.9 (6.0)           | 51.9 (6.1)           | 51.5 (5.5)           | NS       | NS           | NS           | NS           |
| <b>Males</b>                                | 44.3 %<br>(n=319)    | 65.3 %<br>(n=81)     | 59.9 %<br>(n=82)     | < 0.001  | -            | -            | -            |
| <b>Hypertensives</b>                        | 41.4 %<br>(n=298)    | 66.1 %<br>(n=82)     | 71.5 %<br>(n=103)    | < 0.001  | -            | -            | -            |
| <b>BMI (kg/m<sup>2</sup>)</b>               | 26.4 (3.9)           | 29.8 (5.0)           | 31.9 (4.9)           | < 0.001  | < 0.001      | < 0.001      | < 0.001      |
| <b>Waist circumference<br/>(cm)</b>         | 86.8 (11.9)          | 97.7 (12.0)          | 102.3<br>(11.8)      | < 0.001  | < 0.001      | < 0.01       | < 0.001      |
| <b>Smoking (pack years)</b>                 | 10.6 (13.3)          | 14.3 (14.9)          | 14.0 (14.6)          | < 0.05   | NS           | NS           | NS           |
| <b>Alcohol consumption<br/>(g/week)</b>     | 51.1 (83.0)          | 95.1<br>(117.0)      | 82.6<br>(105.1)      | < 0.01   | < 0.05       | NS           | NS           |
| <b>Total serum cholesterol<br/>(mmol/L)</b> | 5.6 (1.0)            | 5.8 (1.1)            | 5.8 (1.1)            | NS       | NS           | NS           | NS           |
| <b>LDL (mmol/L)</b>                         | 3.5 (0.9)            | 3.7 (1.1)            | 3.5 (0.9)            | NS       | NS           | NS           | NS           |
| <b>Triglycerides (mmol/L)</b>               | 1.4 (0.8)            | 1.9 (0.8)            | 2.2 (1.4)            | < 0.001  | < 0.001      | < 0.05       | < 0.001      |
| <b>Systolic blood pressure</b>              | 145.2<br>(21.5)      | 152.7<br>(20.3)      | 157.1<br>(22.2)      | < 0.001  | < 0.01       | NS           | < 0.001      |
| <b>Fasting insulin<br/>(mmol/L)</b>         | 10.8 (7.7)           | 18.2 (10.3)          | 23.8 (17.6)          | < 0.001  | < 0.001      | < 0.001      | < 0.001      |

|                                    |                    |                    |                    |         |         |         |         |
|------------------------------------|--------------------|--------------------|--------------------|---------|---------|---------|---------|
| <b>Fasting glucose</b>             | 4.4 (0.7)          | 5.0 (1.4)          | 6.1 (2.8)          | < 0.001 | < 0.001 | < 0.001 | < 0.001 |
| <b>(mmol/L)</b>                    |                    |                    |                    |         |         |         |         |
| <b>QUICKI</b>                      | 0.6 (0.1)          | 0.6 (0.1)          | 0.5 (0.1)          | < 0.001 | < 0.001 | < 0.001 | < 0.001 |
| <b>hs-CRP (ng/mL)</b>              | 3039.4<br>(6758.3) | 3981.4<br>(6068.2) | 6122.0<br>(6630.8) | < 0.001 | < 0.001 | < 0.01  | < 0.001 |
| <b>ALT U/L</b>                     | 26.2 (15.5)        | 37.8 (17.1)        | 55.4 (37.7)        | < 0.001 | < 0.001 | < 0.001 | < 0.001 |
| <b>GGT U/L</b>                     | 35.1 (33.5)        | 69.7<br>(116.3)    | 76.8 (92.4)        | < 0.001 | < 0.001 | < 0.01  | < 0.001 |
| <b>Anti-hypertensive treatment</b> | 43.6%<br>(n=314)   | 66.9%<br>(n=83)    | 72.9%<br>(n=105)   | < 0.001 | -       | -       | -       |
| <b>Lipid-lowering treatment</b>    | 2.2%<br>(n=16)     | 1.6% (n=2)         | 6.2% (n=9)         | < 0.05  | -       | -       | -       |
| <b>Hypoglycaemic drug</b>          | 1.1% (n=8)         | 1.6% (n=2)         | 10.4%<br>(n=15)    | < 0.001 | -       | -       | -       |
| <b>Type 2 diabetes</b>             | 2.4%<br>(n=17)     | 12.1%<br>(n=15)    | 36.8%<br>(n=53)    | < 0.001 | -       | -       | -       |

504

505 **Table 1.** Baseline characteristics of the study group as means (standard deviations) or  
506 percentages. N= number of subjects. ALT, alanine aminotransferase, BMI, body mass index,  
507 GGT, gamma-glutamyltransferase, hs-CRP, high-sensitivity C-reactive protein, LDL, low-  
508 density lipoprotein, QUICKI, quantitative insulin sensitivity check index.

509

|                                  | Model 1             | Model 2             | Model 3             | Model 4             | Model 5              |
|----------------------------------|---------------------|---------------------|---------------------|---------------------|----------------------|
| <b>Moderate fat content</b>      | 1.51 (0.99-2.29)    | 1.44 (0.93-2.23)    | 1.31 (0.84-2.05)    | 1.30 (0.84-2.01)    | 1.49 (0.99-2.26)     |
| <b>Severe fat content</b>        | 1.92 (1.32-2.80)**  | 1.74 (1.16-2.63) ** | 1.49 (0.97-2.30)    | 1.43 (0.93-2.18)    | 1.76 (1.21- 2.56) ** |
| <b>Study group</b>               | 1.34 (0.98-1.85)    | 1.29 (0.92-1.80)    | 1.28 (0.92-1.78)    |                     |                      |
| <b>Age</b>                       | 1.06 (1.03-1.09)*** | 1.05(1.02-1.08)**   | 1.05 (1.02-1.08)**  | 1.05 (1.02-1.07)**  | 1.05 (1.02-1.08) **  |
| <b>Gender</b>                    | 2.39 (1.71-3.34)*   | 1.91 (1.34-2.71)*** | 1.80 (1.26-2.57)**  | 1.83 (1.29-2.60) ** | 1.92 (1.36-2.72) *** |
| <b>LDL-cholesterol</b>           |                     | 1.17 (0.99-1.39)    | 1.15 (0.97-1.37)    |                     |                      |
| <b>Smoking (pack-years)</b>      |                     | 1.02 (1.01-1.03)*** | 1.02 (1.01-1.03)*** | 1.02 (1.01-1.03)*** | 1.02 (1.01-1.03) *** |
| <b>Alcohol consumption (gr1)</b> |                     | 0.93 (0.59-1.45)    | 0.92(0.59-1.44)     |                     |                      |
| <b>Alcohol consumption (gr2)</b> |                     | 0.84 (0.44-1.60)    | 0.81(0.42-1.54)     |                     |                      |
| <b>Systolic blood pressure</b>   |                     | 1.01 (1.00-1.02)**  | 1.01 (1.00-1.02)*   | 1.01 (1.00-1.02)**  | 1.01 (1.00-1.02) **  |
| <b>Body mass index</b>           |                     | 0.99 (0.96-1.03)    | 0.97 (0.93-1.01)    |                     |                      |
| <b>QUICKI</b>                    |                     |                     | 0.12 (0.02-0.90)*   | 0.16 (0.03-0.99)*   |                      |

510

511

1  
2  
3 512 **Table 2.** Multivariate analysis for cardiovascular events with different degrees of adjustments  
4  
5 513 (Cox regression analysis). CVD event occurred in 13.5% of the subjects with no fat in the  
6  
7 514 liver (97/720), 24.2% (30/124) of subjects having moderate liver fat content and 29.2%  
8  
9 515 (42/144) of the subjects having severe fatty liver. Hazard ratios with 95% confidence interval  
10  
11 516 with different degrees of adjustments are presented. Alcohol consumption was divided into  
12  
13 517 groups (reference group: less than 1g/week in men and women, group 1: less than 210g/week  
14  
15 518 in men and less than 140 g/week in women, group 2: more than 210g/week in men and more  
16  
17 519 than 140g/week in women). Model 1: adjustment for study group, age and gender. Model 2:  
18  
19 520 further adjustments for LDL-cholesterol, smoking, alcohol consumption, systolic blood  
20  
21 521 pressure and body mass index. Model 3: further adjustment for QUICKI. Model 4:  
22  
23 522 adjustments with statistically significant covariates. Model 5: adjustments with statistically  
24  
25 523 significant covariates without QUICKI. LDL, low-density lipoprotein, QUICKI, quantitative  
26  
27 524 insulin sensitivity check index. \*\*\*  $p < 0.001$ , \*\*  $p < 0.01$ , \*  $p < 0.05$ .  
28  
29  
30  
31  
32  
33 525  
34  
35  
36 526  
37  
38  
39 527  
40  
41  
42  
43 528  
44  
45  
46 529  
47  
48  
49 530  
50  
51  
52  
53 531  
54  
55  
56  
57  
58  
59  
60

| Grade of liver<br>bightness | Total       | 0<br>(n=720) | 1<br>(n=124) | 2<br>(n=144) | p       |
|-----------------------------|-------------|--------------|--------------|--------------|---------|
| <b>Non-fatal events</b>     |             |              |              |              |         |
| <b>CVD</b>                  | 11.6% (115) | 9.9% (71)    | 16.1% (20)   | 16.7% (24)   | < 0.05  |
| <b>CHD</b>                  | 7.8% (77)   | 6.5% (47)    | 11.3% (14)   | 11.1% (16)   | NS      |
| <b>Stroke</b>               | 5.0% (49)   | 4.2% (30)    | 8.1% (10)    | 6.2% (9)     | NS      |
| <b>Fatal events</b>         |             |              |              |              |         |
| <b>CVD</b>                  | 5.5% (54)   | 3.6% (26)    | 8.1% (10)    | 12.5% (18)   | < 0.001 |
| <b>CHD</b>                  | 4.8% (47)   | 3.2% (23)    | 7.3% (9)     | 10.4% (15)   | < 0.01  |
| <b>Stroke</b>               | 0.8% (8)    | 0.6% (4)     | 0.8% (1)     | 2.1% (3)     | NS      |

532 **Table 3.** CVD, CHD and stroke follow-up data of the study group as percentages (number of  
533 events). CVD included a major CHD event and stroke (excluding subarachnoid hemorrhage) -  
534 whichever of these happened first. N=number of subjects. CHD, coronary heart disease,  
535 CVD, cardiovascular disease.

| Final model    | Cardiovascular event<br>c-index (95% CI) | Binary R <sup>2</sup> |     |
|----------------|------------------------------------------|-----------------------|-----|
|                |                                          |                       | 536 |
|                |                                          |                       | 537 |
|                |                                          |                       | 538 |
| <b>Model 3</b> | 0.729 (0.706-0.776)                      | 0.153                 | 539 |
|                |                                          |                       | 540 |
| <b>Model 4</b> | 0.720 (0.689-0.763)                      | 0.144                 |     |
|                |                                          |                       | 541 |
|                |                                          |                       | 542 |
| <b>Model 5</b> | 0.717 (0.686-0.758)                      | 0.138                 |     |
|                |                                          |                       | 543 |
| <b>Model 1</b> | 0.698 (0.656-0.742)                      | 0.133                 |     |

**Table 4.** Multivariate analysis for cardiovascular events (logistic regression analysis). Cardiovascular disease risk factors have been removed from the models step by step. Model 3 included liver brightness, study group, age, gender, smoking, alcohol consumption, systolic blood pressure, LDL-cholesterol level, body mass index and QUICKI. Model 4 included liver brightness, age, gender, smoking, blood pressure and QUICKI. Model 5 included liver brightness, age, gender, smoking, blood pressure. Model 1 included liver brightness, study group, age and gender. C-index with confidence intervals obtained from 250 bootstrap resamplings and binary R<sup>2</sup> was used. LDL, low-density lipoprotein, QUICKI, quantitative insulin sensitivity check index.



553

For peer review only

1  
2  
3  
4  
5  
6  
7  
8  
9  
10  
11  
12  
13  
14  
15  
16  
17  
18  
19  
20  
21  
22  
23  
24  
25  
26  
27  
28  
29  
30  
31  
32  
33  
34  
35  
36  
37  
38  
39  
40  
41  
42  
43  
44  
45  
46  
47  
48  
49  
50  
51  
52  
53  
54  
55  
56  
57  
58  
59  
60

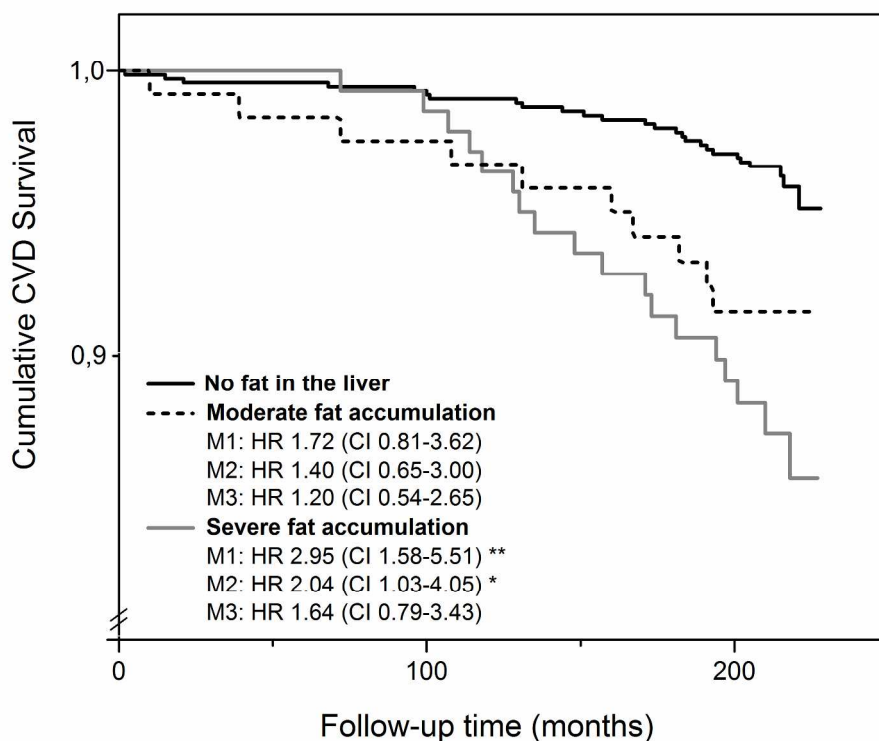

35 Title: Kaplan Meier cumulative survival rates censored for cardiovascular death in subjects with no fat in the  
 36 liver, moderate fat content and severe fat content.

37 CVD was the cause of death in 3.6% of the subjects (26/720) with non-fatty liver and 8.1% of the subjects  
 38 (10/124) with moderate liver fat content, while 12.5% of the subjects with severe fatty liver (18/144). Cox  
 39 regression analysis is used for adjustments. M1 (Model 1): adjusted for study group, age and gender. M2  
 40 (Model 2): further adjustments for smoking, alcohol consumption, systolic blood pressure, LDL-cholesterol  
 41 level and body mass index. M3 (Model 3): further adjustment for QUICKI. CVD, cardiovascular disease, CI,  
 42 confidence interval, HR, hazard ratio, QUICKI, quantitative insulin sensitivity check index. \*\*  $p < 0.01$ , \*  $p$   
 43  $< 0.05$ .

44 247x209mm (300 x 300 DPI)

45  
46  
47  
48  
49  
50  
51  
52  
53  
54  
55  
56  
57  
58  
59  
60

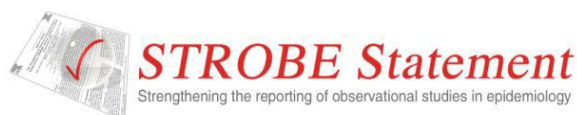

STROBE Statement—Items to be included when reporting observational studies in a conference abstract

| Item                                                                                                       | Recommendation                                                                                                                                                                                                                                                                                                                                                                                                                                                                                  |
|------------------------------------------------------------------------------------------------------------|-------------------------------------------------------------------------------------------------------------------------------------------------------------------------------------------------------------------------------------------------------------------------------------------------------------------------------------------------------------------------------------------------------------------------------------------------------------------------------------------------|
| Title                                                                                                      | Indicate the study's design with a commonly used term in the title (e.g cohort, case-control, cross sectional) <b>page 1</b>                                                                                                                                                                                                                                                                                                                                                                    |
| Authors                                                                                                    | Contact details for the corresponding author <b>page 1</b>                                                                                                                                                                                                                                                                                                                                                                                                                                      |
| Study design                                                                                               | Description of the study design (e.g cohort, case-control, cross sectional) <b>page 6</b>                                                                                                                                                                                                                                                                                                                                                                                                       |
| Objective                                                                                                  | Specific objectives or hypothesis <b>page 5</b>                                                                                                                                                                                                                                                                                                                                                                                                                                                 |
| Methods                                                                                                    | <b>page 5</b>                                                                                                                                                                                                                                                                                                                                                                                                                                                                                   |
| Setting                                                                                                    | Description of setting, follow-up dates or dates at which the outcome events occurred or at which the outcomes were present, as well as any points or ranges on other time scales for the outcomes (e.g., prevalence at age 18, 1998-2007). <b>page 7</b>                                                                                                                                                                                                                                       |
| Participants                                                                                               | <p><i>Cohort study</i>—Give the most important eligibility criteria, and the most important sources and methods of selection of participants. Describe briefly the methods of follow-up <b>page 6</b></p> <p><i>Case-control study</i>—Give the major eligibility criteria, and the major sources and methods of case ascertainment and control selection</p> <p><i>Cross-sectional study</i>—Give the eligibility criteria, and the major sources and methods of selection of participants</p> |
| <i>Cohort study</i> —For matched studies, give matching and number of exposed and unexposed <b>page 7</b>  |                                                                                                                                                                                                                                                                                                                                                                                                                                                                                                 |
| <i>Case-control study</i> —For matched studies, give matching criteria and the number of controls per case |                                                                                                                                                                                                                                                                                                                                                                                                                                                                                                 |
| Variables                                                                                                  | Clearly define primary outcome for this report. <b>page 10</b>                                                                                                                                                                                                                                                                                                                                                                                                                                  |
| Statistical methods                                                                                        | Describe statistical methods, including those used to control for confounding <b>page 9</b>                                                                                                                                                                                                                                                                                                                                                                                                     |
| Results                                                                                                    |                                                                                                                                                                                                                                                                                                                                                                                                                                                                                                 |
| Participants                                                                                               | Report Number of participants at the beginning and end of the study <b>page 7</b>                                                                                                                                                                                                                                                                                                                                                                                                               |
| Main results                                                                                               | <p>Report estimates of associations. If relevant, consider translating estimates of relative risk into absolute risk for a meaningful time period</p> <p>Report appropriate measures of variability and uncertainty (e.g., odds ratios with confidence intervals) <b>page 10</b></p>                                                                                                                                                                                                            |
| Conclusions                                                                                                | General interpretation of study results <b>page 12</b>                                                                                                                                                                                                                                                                                                                                                                                                                                          |

1  
2  
3  
4  
5  
6  
7  
8  
9  
10  
11  
12  
13  
14  
15  
16  
17  
18  
19  
20  
21  
22  
23  
24  
25  
26  
27  
28  
29  
30  
31  
32  
33  
34  
35  
36  
37  
38  
39  
40  
41  
42  
43  
44  
45  
46  
47  
48  
49  
50  
51  
52  
53  
54  
55  
56  
57  
58  
59  
60

For peer review only

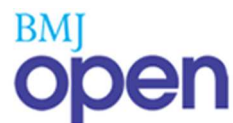

**Fatty liver predicts the risk for cardiovascular events in middle-aged population: a population-based cohort study**

|                                 |                                                                                                                                                                                                                                                                                                                                                                                          |
|---------------------------------|------------------------------------------------------------------------------------------------------------------------------------------------------------------------------------------------------------------------------------------------------------------------------------------------------------------------------------------------------------------------------------------|
| Journal:                        | <i>BMJ Open</i>                                                                                                                                                                                                                                                                                                                                                                          |
| Manuscript ID:                  | bmjopen-2014-004973.R1                                                                                                                                                                                                                                                                                                                                                                   |
| Article Type:                   | Research                                                                                                                                                                                                                                                                                                                                                                                 |
| Date Submitted by the Author:   | 21-Feb-2014                                                                                                                                                                                                                                                                                                                                                                              |
| Complete List of Authors:       | Pisto, Pauliina; Clinical medicine, Internal medicine<br>Santaniemi, Merja; Institute of Clinical Medicine, Department of Internal Medicine<br>Bloigu, Risto; Medical Informatics and Statistics Research Group,<br>Ukkola, Olavi; Institute of Clinical Medicine, Department of Internal Medicine<br>Kesäniemi, Antero; Institute of Clinical Medicine, Department of Internal Medicine |
| <b>Primary Subject Heading</b>: | Diabetes and endocrinology                                                                                                                                                                                                                                                                                                                                                               |
| Secondary Subject Heading:      | Cardiovascular medicine                                                                                                                                                                                                                                                                                                                                                                  |
| Keywords:                       | Adult cardiology < CARDIOLOGY, Coronary heart disease < CARDIOLOGY, General diabetes < DIABETES & ENDOCRINOLOGY, Hepatology < INTERNAL MEDICINE                                                                                                                                                                                                                                          |
|                                 |                                                                                                                                                                                                                                                                                                                                                                                          |

SCHOLARONE™  
Manuscripts

only

1  
2  
3  
4 1 **Fatty liver predicts the risk for cardiovascular events in middle-aged population: a**  
5  
6 2 **population-based cohort study**  
7  
8

9 3 Pauliina Pisto<sup>1</sup>, Merja Santaniemi<sup>1</sup>, Risto Bloigu<sup>2</sup>, Olavi Ukkola<sup>1</sup>, Y. Antero Kesäniemi<sup>1</sup>  
10  
11

12 4 <sup>1</sup>Institute of Clinical Medicine, Department of Internal Medicine and Biocenter Oulu,  
13 5 University of Oulu, and Clinical Research Center, Oulu University Hospital, Oulu, Finland,  
14 6 P.O. Box 20, 90029 OYS, Finland  
15  
16

17 7 <sup>2</sup>Medical Informatics and Statistics Research Group, University of Oulu, Aapistie 7, P.O. Box  
18 8 5000, 90014 Oulu, Finland  
19  
20  
21  
22  
23  
24

25 9 **Contact information:** Pauliina Pisto, corresponding author  
26  
27

28 10 University of Oulu  
29  
30

31 11 Institute of Clinical Medicine  
32  
33

34 12 Department of Internal medicine  
35  
36

37 13 P.O. Box 5000, 90014 Oulu, Finland  
38  
39

40 14 Tel.: +35885376310  
41  
42

43 15 Fax: +35885376318  
44  
45

46 16 E-mail: pauliina.pisto@oulu.fi  
47  
48

49 17 **Word count:** 6142  
50  
51

52 18 **Keywords:** coronary disease, fatty liver, insulin resistance, risk factors, stroke  
53  
54  
55  
56  
57  
58  
59  
60

1  
2  
3 21 **ABSTRACT**  
4

5 22 **Objective:** We investigated if the differences in liver fat content would predict the  
6  
7 23 development of non-fatal and fatal atherosclerotic endpoints (coronary heart disease and  
8  
9 24 stroke).

10  
11 25 **Design, setting and participants:** Our study group is a population-based, randomly recruited  
12  
13 26 cohort (OPERA), initiated in 1991. The cohort consisted of 988 middle-aged Finnish subjects.

14  
15 27 **Intervention:** Total mortality and hospital events were followed up to 2009 based on the  
16  
17 28 registry of the National Institute for Health and Welfare and the National death registry.

18  
19 29 **Main outcome measure:** The severity of hepatic steatosis was measured by ultrasound and  
20  
21 30 divided into three groups (0-2). Cox regression analysis was used in the statistical analysis.

22  
23 31 **Results:** In the follow-up of years 1991-2009, 13.5% of the subjects with non-fatty liver,  
24  
25 32 24.2% of subjects having moderate liver fat content and 29.2% of the subjects having severe  
26  
27 33 fatty liver experienced a cardiovascular event during the follow-up time ( $p < 0.001$ ). Severe  
28  
29 34 liver fat content predicted the risk for future risk of cardiovascular event even when adjusted  
30  
31 35 for age, gender and study group (HR 1.92, CI 1.32-2.80,  $p < 0.01$ ). When further adjustments  
32  
33 36 for smoking, alcohol consumption, LDL-cholesterol, BMI and systolic blood pressure were  
34  
35 37 conducted, the risk still remained statistically significant (HR 1.74, CI 1.16-2.63,  $p < 0.01$ ).  
36  
37 38 Statistical significance disappeared with further adjustment for QUICKI.

38  
39 39 **Conclusions:** Liver fat content increases the risk of future cardiovascular disease event in  
40  
41 40 long-term follow-up but it seems to be dependent on insulin sensitivity.  
42  
43  
44  
45  
46  
47  
48  
49  
50  
51  
52  
53  
54  
55  
56  
57  
58  
59  
60

1  
2  
3 45 **Article focus**  
4  
5

6 46 1 To investigate if the differences in liver fat content predict the risk for development of fatal  
7  
8 47 or nonfatal atherosclerotic endpoints such as coronary heart disease and stroke.  
9  
10

11 48 **Key messages**  
12  
13

14 49 1 Subjects with ultrasound-diagnosed fatty liver have cardiovascular disease more often  
15  
16 50 compared to the subjects without fat in the liver  
17  
18

19  
20 51 2 Severe liver fat content increases the risk of a future cardiovascular event and mortality to  
21  
22 52 cardiovascular disease over the long-term follow-up but it does seem to be dependent on  
23  
24 53 insulin sensitivity  
25  
26

27 54 3 Severe fatty liver predicts the risk for overall mortality but the association is dependent on  
28  
29 55 traditional metabolic risk factors  
30  
31  
32

33 56 **Strengths and limitations of the study**  
34  
35

36 57 1 This is a follow-up study with a large population-based study group and a very long follow-  
37  
38 58 up time  
39  
40

41 59 2 Official registers used in event diagnoses - data is accurate and the classification is  
42  
43 60 systematic  
44  
45

46 61 3 Grade of liver brightness was measured by ultrasound, which has a high specificity but low  
47  
48 62 sensitivity  
49  
50

51 63  
52  
53

54 64  
55

56 65  
57  
58  
59  
60



1  
2  
3 66  
4  
5 67  
6  
7  
8 68 **Introduction**  
9

10 69 Non-alcoholic fatty liver disease (NAFLD) refers to liver disorders such as abnormal fat  
11  
12 70 content, which exists in a spectrum ranging from steatosis with no inflammation to non-  
13  
14 71 alcoholic steatohepatitis (NASH), which can ultimately lead to liver cirrhosis <sup>1</sup>. The  
15  
16 72 prevalence of NAFLD is estimated to range from 20 to 30% of population in Western  
17  
18 73 countries, being the leading cause of liver disorders <sup>2,3</sup>. It is associated with obesity, type 2  
19  
20 74 diabetes mellitus (T2DM) and hyperlipidemia <sup>1</sup>. NAFLD is commonly regarded as a hepatic  
21  
22 75 manifestation of the metabolic syndrome and both conditions share several risk factors for  
23  
24 76 cardiovascular disease (CVD) <sup>3,4</sup>.  
25  
26  
27  
28  
29  
30  
31

32 78 In 2008, the prevalence of CVD in adults ( $\geq 20$  years) in United States was 36.2% <sup>5</sup>. Every  
33  
34 79 year, 4.3 million subjects die for CVD in Europe causing nearly half of the all deaths (48%) <sup>6</sup>.  
35  
36 80 So-called traditional risk factors for cardiovascular disease are age, gender, smoking, high  
37  
38 81 low-density lipoprotein (LDL) cholesterol concentration, hypertension and diabetes <sup>7</sup>. In  
39  
40 82 addition, total body fatness as well as abdominal fat accumulation increase independently the  
41  
42 83 risk of CVD and insulin resistance is regarded to be an important factor linking visceral  
43  
44 84 adiposity to cardiovascular risk <sup>8</sup>. Adipose tissue is now recognized as a significant endocrine  
45  
46 85 organ as adipocytes and macrophages infiltrating adipocytes secrete a number of bioactive  
47  
48 86 mediators <sup>7</sup>. Adipokines, proinflammatory cytokines and hypofibrinolytic markers may lead to  
49  
50 87 oxidative stress and endothelial dysfunction, finally leading to atherosclerosis <sup>9</sup>.  
51  
52  
53  
54  
55  
56  
57  
58  
59  
60

88

1  
2  
3 89 Hepatic steatosis has been discussed as a possible mechanism to explain CVD morbidity and  
4  
5 90 mortality<sup>10</sup>. NAFLD patients have been reported to have higher coronary heart disease (CHD)  
6  
7 91 risk than the general population of the same age and gender<sup>11</sup>. According to previous study,  
8  
9 92 liver dysfunction associated with CVD mortality in men<sup>12</sup> whereas another large study found  
10  
11 93 no association between NAFLD and CVD in general population<sup>13</sup>. In addition, fatty liver did  
12  
13 94 not predict CVD mortality and morbidity in patients with established coronary artery disease  
14  
15 95  
16  
17  
18  
19  
20 96  
21  
22

23 97 The NAFLD and CVD share several molecular mechanisms<sup>15,16</sup>. Fatty liver might play a part  
24  
25 98 in the pathogenesis of CVD through the overexpression and systemic release of several  
26  
27 99 inflammatory, hemostatic<sup>17</sup> and oxidative-stress mediators or via contributing to whole-body  
28  
29 100 insulin resistance and atherogenic dyslipidemia<sup>3</sup>. NAFLD has also been reported to be linked  
30  
31 101 with circulatory endothelial dysfunction<sup>4,14</sup>. Several investigators have reported that NAFLD  
32  
33 102 is associated with coronary artery disease<sup>4,14</sup> and increased carotid intima-media thickness<sup>18</sup>,  
34  
35 103  
36 103<sup>19</sup>. Increased gamma-glutamyltransferase (GGT), which may be a marker of NAFLD, has  
37  
38 104 been reported to be associated with stroke<sup>20</sup>.

39  
40  
41 105  
42  
43  
44  
45 106 It is known that subjects with fatty liver disease have an increased risk of suffering CVD<sup>4</sup>, but  
46  
47 107 whether NAFLD is an independent indicator of cardiovascular disease is still far from clear.  
48  
49 108 Long-term follow-up studies are needed to clarify the correlation between fatty liver and  
50  
51 109 CVD. The aim of our study was to investigate if fatty liver could predict independently the  
52  
53 110 risk for total mortality as well as non-fatal and fatal cardiovascular endpoints with a 19-year  
54  
55 111 follow-up after adjusting for all known conventional risk factors.  
56  
57  
58  
59  
60

1  
2  
3 112  
4  
56 113 **Materials and methods**  
78  
9 114 **Human subjects**  
10

11  
12 OPERA (Oulu Project Elucidating Risk of Atherosclerosis) is a population-based,  
13  
14 epidemiological prospective cohort study designed to address the risk factors and disease end  
15  
16 points of atherosclerotic cardiovascular diseases. Selection criteria of the study subjects have  
17  
18 been described earlier<sup>21</sup>. In short, a total of 520 men and 525 women participated: 259 control  
19  
20 men, 261 hypertensive men, 267 control women and 258 hypertensive women aged 40-59.  
21  
22 Hypertensive participants were randomly selected from the national register for  
23  
24 reimbursement of the costs of antihypertensive medication. For each hypertensive subject, an  
25  
26 age- and sex-matched control subject was randomly selected from the same register. Informed  
27  
28 consent in writing was obtained from each patient. The study protocol conformed to the  
29  
30 ethical guidelines of the 1975 Declaration of Helsinki and this study was approved by the  
31  
32 Ethical Committee of the Faculty of Medicine, University of Oulu.  
33  
34  
35  
36  
37  
38  
39  
40  
41  
42

43  
44  
45  
46  
47  
48  
49  
50  
51  
52 127 **Determination of hepatic steatosis**  
53

54  
55 The determination of hepatic steatosis was based on liver-kidney contrast<sup>22</sup> measured with  
56  
57 ultrasonography<sup>23</sup> by one trained radiologist with 10 years' experience in abdominal  
58  
59 ultrasound examinations. Normal liver parenchyma should be slightly more echogenic (brighter)  
60  
than the kidney parenchyma. In a case of increased liver echogenicity an ultrasound diagnosis of  
bright liver was settled. The severity of hepatic steatosis was based on the brightness of the liver  
and it was classified into three groups ranging from 0 to 2 (0 = normal bright, indicating a

1  
2  
3 134 non-fatty liver, 1 = medium bright, a moderate lipid content and 2 = clearly bright, a severe  
4  
5 135 lipid content and fatty liver) <sup>24</sup>.  
6  
7  
8  
9  
10  
11  
12

136

### 137 **Follow-up**

138 Both the hypertensive and the control men were recruited during December 1990 to May  
139 1992 and the women approximately one year later (n=1045). In total, 1023 subjects had a  
140 liver ultrasound result available at baseline. Mortality data were obtained from the National  
141 Death Registry and the diagnoses of cardiovascular events were based on the registry of the  
142 National Institute for Health and Welfare. The follow-up time ended December 31, 2009 or  
143 whenever the first event occurred. Cardiovascular events included fatal and non-fatal  
144 endpoints. Subjects with a previous hospital-diagnosed myocardial infarction or stroke (n=41)  
145 at baseline were excluded. In total, 988 subjects participated in this part of the study.  
146

147 CVD included a major CHD event and stroke (excluding subarachnoid hemorrhage, SAH) -  
148 whichever of these happened first <sup>25</sup>. The evidence of CHD was based on the following  
149 diagnosis: I20.0, I21, I22 [ICD-10, International Statistical Classification of Diseases and  
150 Related Health Problems] / 410, 4110 [ICD-8/9] as the main diagnosis (symptom or cause)  
151 and I21, I22 [ICD-10] / 410 [ICD-8/9] as a first side diagnosis (symptom or cause) or second  
152 side diagnosis (symptom or cause) and third side diagnosis (ICD-8/9 only) or if a subject had  
153 undergone coronary artery bypass graft (CABG) surgery or angioplasty. CHD as a cause of  
154 death included I20–I25, I46, R96, R98 [ICD-10] / 410-414, 798 (not 7980A) [ICD-8/9] as the  
155 underlying cause of death or immediate cause of death and I21 or I22 [ICD-10] / 410 [ICD-  
156 8/9] as first to third contributing cause of death. Stroke (excluding SAH) included I61, I63

1  
2  
3 157 (not I636), I64 [ICD -10] / 431, 4330A, 4331A, 4339A, 4340A, 4341A, 4349A, 436 [ICD-9] /  
4  
5 158 431 (except 43101, 43191) 433, 434, 436 [ICD-8] as main diagnosis (symptom or cause) or as  
6  
7 159 a first or second side diagnosis (symptom or cause) or as a third side diagnosis (ICD-8/9 only)  
8  
9  
10 160 or as an underlying cause of death or immediate cause of death or as a first to third  
11  
12 161 contributing cause of death <sup>26</sup>.

13  
14  
15 162

### 163 **Laboratory analyses**

164 Waist circumference, body mass index (BMI) and blood pressure were measured as described  
165 in previous study <sup>21</sup>.

166  
167

168 All the laboratory test samples were obtained after an overnight fast. Blood insulin and  
169 glucose concentrations were analyzed at 0, 60, and 120 min after administration of 75 g  
170 glucose <sup>24</sup>. Insulin sensitivity was assessed using fasting plasma insulin concentrations and a  
171 quantitative insulin sensitivity check index (QUICKI) {QUICKI=1/[log (fasting insulin)+log  
(fasting glucose)]} <sup>27</sup>.

172  
173

174 Very-low-density lipoprotein (VLDL), high-density lipoprotein (HDL), low-density  
175 lipoprotein (LDL) and hs-CRP concentrations <sup>24</sup> as well as alanine aminotransferase (ALT)  
176 and GGT levels were measured as described previously <sup>23</sup>. Alcohol consumption and smoking  
177 history were determined by validated questionnaires <sup>28</sup>. Alcohol consumption was divided into  
178 three groups: 0 (n=161) mean alcohol consumption less than 1g/week in men and women, 1  
(n=767) mean consumption less than 210g/week in men and less than 140 g/week in women,

1  
2  
3 179 2 (n=76) mean alcohol consumption more than 210g/week in men and more than 140g/week  
4  
5 180 in women. Group 2 designates large-scale alcohol consumers according to the guidelines<sup>29</sup>.  
6  
7

8 181  
9

## 10 11 182 **Statistical analysis**

12  
13  
14 183 Statistical analysis was performed by using IBM SPSS Statistics for Windows, Version 20.0  
15  
16 184 (Armonk, NY: IBM Corp.). Analysis of variance was used to compare the means of the  
17  
18 185 variables measured. Post hoc tests were performed using the Tukey method. Statistical  
19  
20 186 significances between percentages were measured by using  $\chi^2$  test. Cumulative survival rates  
21  
22 187 were estimated using Kaplan-Meier method. Cox regression analysis was performed to  
23  
24 188 investigate if liver brightness (fat) could predict the future risk for total mortality,  
25  
26 189 cardiovascular death or hospital events. A p value < 0.05 was regarded as significant.  
27  
28  
29

30  
31 190  
32

33  
34 191 Skewed variables (smoking, alcohol consumption, fasting insulin, fasting glucose,  
35  
36 192 triglyceride, ALT, GGT concentration, hs-CRP level) were logarithmically transformed to  
37  
38 193 improve normality before analysis of variance. We used three models with progressive  
39  
40 194 degrees of adjustments. Model 1 included study group (subjects with medicine-treated  
41  
42 195 hypertension and their age- and sex-matched controls), age and gender. Model 2 included  
43  
44 196 further adjustments for smoking, alcohol consumption, systolic blood pressure, LDL-  
45  
46 197 cholesterol level and body mass index. Model 3 included further adjustment for QUICKI. We  
47  
48 198 carried out sensitivity analyses: in the analyses of cardiovascular events, we added all  
49  
50 199 covariates one by one and investigated if the hazard ratios (HR) changed or remained stable  
51  
52  
53 200 when further adjustment with one covariate was performed. Model 4 included variables which  
54  
55  
56  
57  
58  
59  
60

1  
2  
3 201 were stable and were statistically significant in intermediate phases. Model 5 included stable  
4  
5 202 and significant covariates without QUICKI (Table 2).  
6  
7  
8  
9  
10

11 204 C-index was calculated for the model 1, model 3, model 4 and model 5 to assess the  
12  
13 205 discrimination of the risk markers. The analyses were performed in 250 bootstrap resamplings  
14  
15 206 to obtain 95% CI for c-index of each model.  
16  
17  
18  
19  
20  
21

## 22 208 **Results**

23  
24  
25 209 The main baseline characteristics of the study group are shown in Table 1.  
26  
27  
28  
29  
30  
31

32 211 *Table 1 about here*  
33  
34  
35  
36  
37

### 38 213 **Incidence of cardiovascular disease**

39  
40  
41 214 The median follow-up time was 212 (maximum 228) months. During the follow-up time,  
42  
43 215 13.5% of the subjects with no fat in the liver (97/720), 24.2% (30/124) of subjects having  
44  
45 216 moderate liver fat content and 29.2% (42/144) of the subjects having severe fatty liver  
46  
47 217 experienced a CVD event ( $p < 0.001$ ). CVD was the cause of death in 3.6% of the subjects  
48  
49 218 with non-fatty liver (26/720) and 8.1% of the subjects with moderate liver fat content  
50  
51 219 (10/124), while 12.5% (18/144) of the subjects with severe fatty liver ( $p < 0.001$ ) (Table 3).  
52  
53  
54  
55  
56  
57  
58  
59  
60

1  
2  
3 221 Severe liver fat content predicted the risk for future risk of cardiovascular event when  
4  
5 222 adjusted for age, gender and study group (Model 1: HR 1.92, CI 1.32-2.80,  $p < 0.01$ ) (Table  
6  
7 223 2). When further adjustments were made for smoking, alcohol consumption, LDL-cholesterol,  
8  
9 224 BMI and systolic blood pressure (Model 2: HR 1.74, CI 1.16-2.63), the risk still remained  
10  
11 225 statistically significant ( $p < 0.01$ ). Statistical significance disappeared when further  
12  
13 226 adjustment for QUICKI was performed (Model 3: HR 1.49, CI 0.97-2.30,  $p=0.071$ ). In the  
14  
15 227 CVD event sensitivity analyses, all covariates were added one by one and it was examined  
16  
17 228 whether the hazard ratios would change or remain stable. After adjusting for the statistically  
18  
19 229 significant variables (including quick index) in the sensitivity analyses, the association  
20  
21 230 between severe fatty liver was no longer significant (Model 4: HR 1.43, CI 0.93-2.18,  
22  
23 231  $p=0.10$ ). When QUICKI was not added into Model 5, severe fatty liver did predict the risk for  
24  
25 232 future risk for CVD event (HR 1.76, CI 1.21- 2.56,  $p < 0.001$ ) (Table 2). The c-index  
26  
27 233 decreased when the risk factors were removed from the model (Table 4).  
28  
29  
30  
31  
32  
33  
34  
35

36 235 *Tables 2, 3 and 4 about here*

37  
38  
39 236

40  
41  
42 237 The future risk of death from CVD in participants with severe fat content was significant  
43  
44 238 when age, gender and study group were added as covariates (Model 1: HR 2.95, CI 1.58-5.51,  
45  
46 239  $p < 0.01$ ). Even after further adjustments with other conventional risk factors (Model 2: HR  
47  
48 240 2.04, CI 1.03-4.05), statistical significance remained ( $p < 0.05$ ). When QUICKI was added as  
49  
50 241 the covariate, then significance disappeared (Model 3: HR 1.64, CI 0.79-3.43, NS) (Fig 1.).  
51  
52  
53  
54  
55  
56  
57

58 243 *Figure 1 about here*  
59  
60



1  
2  
3 2444  
5  
6 245 **Fatty liver and total mortality**  
7

8  
9 246 In total, 11.9% of the participants not having fatty liver, 18.5% of the subjects having  
10  
11 247 moderate fatty liver and 22.2% of the subjects with severe fatty liver died from all causes ( $p <$   
12  
13 248 0.01). According to Model 1, severe fat content predicted the risk for mortality from all  
14  
15 249 causes when age, gender and study group were added as covariates (HR 1.60, CI 1.05-2.43,  $p$   
16  
17 250  $< 0.05$ ). The significance disappeared when body mass index was added as a covariate (data  
18  
19 251 not shown).  
20  
21  
22

23  
24 252

25  
26  
27 253 We performed all Cox regression analyses after excluding the men consuming more than 210  
28  
29 254 g alcohol and the women drinking more than 140 g alcohol per week. This exclusion did not  
30  
31 255 have any effect on the results (data not shown).  
32  
33

34 256 We performed all Cox regression analyses after excluding patients with insulin treated  
35  
36 257 diabetes mellitus ( $n=9$ ), cortisone treatment at baseline ( $n=41$ ) and previous diagnosis for  
37  
38 258 liver disease ( $n=15$ ) (e.g., virus, medications). This exclusion did not have any effect on the  
39  
40 259 results (data not shown).  
41  
42

43  
44 260 **Discussion**  
45

46  
47 261 The incidences of non-alcoholic fatty liver disease and cardiovascular disease are  
48  
49 262 continuously increasing in the Western world. The question if NAFLD is only a marker or  
50  
51 263 also an early mediator of cardiovascular disease is still largely unanswered. According to the  
52  
53 264 results of the present study, which had an approximately 19-year follow-up fatty liver does  
54  
55 265 predict the future risk for death from all causes, death from cardiovascular disease and risk of  
56  
57  
58  
59  
60

1  
2  
3 266 cardiovascular events. Insulin sensitivity seems to play a more dominant role in the  
4  
5 267 development of cardiovascular events.  
6  
7

8 268  
9

10 269 Only a few studies have investigated the risk for future cardiovascular risk among subjects  
11  
12 270 with ultrasound-diagnosed fatty liver <sup>30,31</sup> and larger studies with longer follow-up times are  
13  
14 271 needed. An association between NAFLD and CVD has been reported <sup>3,30-32</sup> although contrary  
15  
16 272 results also exist <sup>13,33</sup>. A previous large population-based prospective cohort study found no  
17  
18 273 association between NAFLD and CVD, however they categorized the degree of steatosis as a  
19  
20 274 two level variable: none to mild and moderate to severe <sup>13</sup>. An association between  
21  
22 275 ultrasound-diagnosed fatty liver and CVD has been reported in general population <sup>30</sup> and in  
23  
24 276 subjects with T2DM <sup>32</sup>. Furthermore, liver dysfunction has been reported to associate with  
25  
26 277 CVD mortality <sup>34,35</sup> and CHD risk <sup>11</sup> in follow-up studies and especially survival of subjects  
27  
28 278 with NASH is reported to be reduced <sup>33,36,37</sup>. In the present study, severe fatty liver disease did  
29  
30 279 predict the risk for cardiovascular death but the association seemed to be dependent on insulin  
31  
32 280 sensitivity.  
33  
34  
35  
36

37 281  
38

39 282 Several earlier studies have used self-reported CVD history which may not be totally reliable.  
40  
41 283 Although earlier studies on the risk for future cardiovascular risk among subjects with fatty  
42  
43 284 liver have performed some adjustments, the full range of well-known CVD risk factors have  
44  
45 285 been rarely considered <sup>33</sup>. We have performed adjustments with all so-called traditional risk  
46  
47 286 factors for cardiovascular disease (i.e. age, gender, smoking, LDL concentration,  
48  
49 287 hypertension, insulin resistance). Previous studies have used biochemical, radiological and  
50  
51 288 histological methodology for NAFLD diagnosis and staging, which leads to a challenging  
52  
53 289 interpretation of the results <sup>35,38</sup>.  
54  
55  
56  
57  
58  
59  
60

1  
2  
3 290  
4  
5

6 291 This study had an approximately 19-year follow-up time, which is longer than in previous  
7  
8 292 studies <sup>11-14</sup>. When compared to earlier studies <sup>33, 38</sup> this study seems to be the first follow-up  
9  
10 293 study with a large population-based randomly selected study group and a very long follow-up  
11  
12 294 time and ultrasound-diagnosed fatty liver. The diagnosis of cardiovascular events was based  
13  
14 295 on the registry of the National Institute for Health and Welfare and mortality data were  
15  
16 296 obtained from the National Death Registry. The earlier verified FINRISK classification <sup>26</sup> was  
17  
18 297 used to classify the events. Therefore, the reliability of event diagnosis data is accurate and  
19  
20 298 the classification is systematic. All subjects who had myocardial infarction or stroke before  
21  
22 299 baseline were excluded because a history of myocardial infarction is known to increase the  
23  
24 300 risk for recurrent myocardial infarction or cardiovascular death <sup>39</sup> and medication as well as  
25  
26 301 lifestyle secondary prevention strategies are intensive <sup>40</sup>.

27  
28  
29  
30  
31 302  
32  
33

34 303 There are a few follow-up-studies examining whether the fatty liver increases the risk for total  
35  
36 304 mortality <sup>13, 41</sup>. In the present study, severe fatty liver predicted the risk for overall mortality of  
37  
38 305 any causes when age, gender and study group were added covariates, a result in line with an  
39  
40 306 earlier report <sup>42</sup>. In the published literature, NASH rather than simple steatosis has been stated  
41  
42 307 to be linked with decreased overall survival <sup>36</sup> although one study with a large cohort found no  
43  
44 308 association between NAFLD and overall mortality <sup>13</sup>. In our study, the association between  
45  
46 309 severe fatty liver and total mortality disappeared after further adjustment for BMI which  
47  
48 310 means that severe fatty liver is not a strong predictor for overall mortality.

49  
50  
51 311  
52  
53  
54  
55  
56  
57  
58  
59  
60

1  
2  
3 312 The molecular mechanisms linking fatty liver with CVD have been investigated <sup>10, 16</sup>.  
4  
5 313 Enlarged visceral adipose tissue may explain why NAFLD associates with CVD <sup>16</sup>. In  
6  
7 314 individuals with visceral obesity, insulin resistance may contribute to impaired non-esterified  
8  
9 315 fatty acid (NEFA) metabolism <sup>8</sup> and the increasing NEFA flux to the liver may impair liver  
10  
11 316 metabolism leading to increased glucose metabolism and liver dysfunction <sup>7</sup>. The liver is one  
12  
13 317 of the targets of the resulting systemic abnormalities and the source of several proatherogenic  
14  
15 318 factors <sup>3</sup>, such as CRP, fibrinogen, plasminogen activator inhibitor-1 and other inflammatory  
16  
17 319 cytokines <sup>16</sup>. Furthermore, visceral adipose tissue and ectopic fat overexpress factors involved  
18  
19 320 in atherogenesis <sup>16</sup> such as NEFAs and proinflammatory cytokines, for instance interleukin-6  
20  
21 321 and tumor necrosis factor- $\alpha$  <sup>8</sup> leading to chronic systemic inflammation. In addition, hepatic  
22  
23 322 steatosis leads to overproduction of cholesterol-rich remnant particles <sup>4</sup>.  
24  
25  
26  
27  
28  
29  
30

31 323  
32  
33 324 One limitation in this study is that the grade of liver brightness was measured by ultrasound.  
34  
35 325 The invasive diagnostic technique of liver biopsy is regarded as the “golden standard”,  
36  
37 326 especially for the diagnosis of NASH <sup>43</sup>. Real time ultrasound using a combination of  
38  
39 327 sonographic findings does have a high specificity but it underestimates the prevalence of  
40  
41 328 hepatic steatosis when there is less than 20 % fat <sup>44</sup>. Today, magnetic resonance spectroscopy  
42  
43 329 is regarded as the best method for the quantification of liver fat, but this method is limited due  
44  
45 330 to its availability <sup>45</sup>. Unfortunately quantitative measurement of liver fat by ultrasound is  
46  
47 331 subject to several limitations compared to more validated and standardized methods for  
48  
49 332 diagnosing NAFLD and the analysis of intra-observer reproducibility could have been more  
50  
51 333 accurate in the present study. Nonetheless, the noninvasive ultrasound method was chosen  
52  
53 334 because taking liver biopsies from large groups of symptomless subjects would have been  
54  
55 335 ethically unjustifiable and magnetic resonance spectroscopy was not available at the baseline.  
56  
57  
58  
59  
60

1  
2  
3 336  
4  
5

6 337 The OPERA study group consists of subjects with drug-treated hypertension and randomly  
7  
8 338 selected sex- and age-matched controls. Study group was added as a covariate to minimize  
9  
10 339 any selection bias.  
11  
12

### 13 340 **Conclusions**

14  
15  
16  
17 341 Severe liver fat content increased the risk of a future cardiovascular event and mortality to  
18  
19 342 cardiovascular disease over the long-term follow-up but it seemed to be dependent on insulin  
20  
21 343 sensitivity. Fatty liver also predicted the risk for overall mortality. However, conventional  
22  
23 344 cardiovascular disease risk factors seemed to play a major role in developing death from all  
24  
25 345 causes. It would be beneficial to investigate larger cohorts and follow-up studies in order to  
26  
27 346 validate this result.  
28  
29

30  
31 347  
32  
33

### 34 348 **Figure legend**

35  
36  
37 349 Title: Kaplan Meier cumulative survival rates censored for cardiovascular death in subjects  
38  
39 350 with no fat in the liver, moderate fat content and severe fat content.  
40  
41

42  
43 351 CVD was the cause of death in 3.6% of the subjects (26/720) with non-fatty liver and 8.1%  
44  
45 352 of the subjects (10/124) with moderate liver fat content, while 12.5% of the subjects with  
46  
47 353 severe fatty liver (18/144). Cox regression analysis is used for adjustments. M1 (Model 1):  
48  
49 354 adjusted for study group, age and gender. M2 (Model 2): further adjustments for smoking,  
50  
51 355 alcohol consumption, systolic blood pressure, LDL-cholesterol level and body mass index.  
52  
53 356 M3 (Model 3): further adjustment for QUICKI. CVD, cardiovascular disease, CI, confidence  
54  
55  
56  
57  
58  
59  
60

1  
2  
3 357 interval, HR, hazard ratio, QUICKI, quantitative insulin sensitivity check index. \*\*  $p < 0.01$ ,  
4  
5 358 \*  $p < 0.05$ .

6  
7  
8 359

9  
10  
11 360

12  
13  
14 361

15  
16  
17  
18 362 **Acknowledgements**

19  
20  
21 363 The authors thank Markku Päivänsalo, MD, PhD, for the expert liver ultrasound examinations  
22  
23 364 and Ms Saija Kortetjärvi, Ms Liisa Mannermaa, and Ms Leena Ukkola for the excellent  
24  
25 365 technical assistance. M.Sc. Elina Malo and M.Sc. Meiju Saukko are thanked for the  
26  
27 366 cooperation in organizing cardiovascular event and mortality data.

28  
29  
30  
31 367 **Financial support:** This study was supported by the Finnish Foundation for Cardiovascular  
32  
33 368 Research, dated 16 Apr, 2012.

34  
35  
36  
37 369 **Contributor statement:** All authors fulfill all three of the ICMJE guidelines for authorship

38  
39  
40 370 **Pauliina Pisto:** Data acquisition, statistical analysis and interpretation of data, manuscript  
41  
42 371 writing, final approval of the version to be published

43  
44  
45 372 **Merja Santaniemi:** Data acquisition, statistical analysis and data interpretation, critical  
46  
47 373 revision of the manuscript, final approval of the version to be published

48  
49  
50  
51 374 **Risto Bloigu:** Data analysis, interpretation of data, critical revision of the manuscript, final  
52  
53 375 approval of the version to be published

1  
2  
3 376 **Olavi Ukkola:** Study design, data acquisition, data interpretation, critical revision of the  
4  
5 377 manuscript, final approval of the version to be published  
6  
7

8  
9 378 **Y.A Kesäniemi:** Study design, data acquisition, data interpretation, critical revision of the  
10  
11 379 manuscript, final approval of the version to be published  
12

13  
14 380 **Disclosure summary:** Authors report no conflict of interests.  
15

16  
17 381 **Data sharing statement:** Extra data is available by emailing pauliina.pisto(at)oulu.fi  
18  
19

20  
21 382 **Competing Interests:** None  
22

23  
24 383  
25

26  
27 384  
28  
29

30  
31 385  
32

33  
34 386  
35  
36

37  
38 387  
39

40  
41 388  
42

43  
44 389  
45  
46

47  
48 390  
49

50  
51 391  
52

53  
54 392  
55  
56

57  
58 393  
59  
60

394 **References**

- 395 1. Angulo P. Nonalcoholic fatty liver disease. *N Engl J Med* 2002; Apr 18;346(16):1221-31.
- 396 2. Armstrong MJ, Houlihan DD, Bentham L, et al. Presence and severity of non-alcoholic  
397 fatty liver disease in a large prospective primary care cohort. *J Hepatol* 2012; Jan;56(1):234-  
398 40.
- 399 3. Targher G, Day CP, Bonora E. Risk of cardiovascular disease in patients with nonalcoholic  
400 fatty liver disease. *N Engl J Med* 2010; Sep 30;363(14):1341-50.
- 401 4. Targher G, Arcaro G. Non-alcoholic fatty liver disease and increased risk of cardiovascular  
402 disease. *Atherosclerosis* 2007; Apr;191(2):235-40.
- 403 5. Roger VL, Go AS, Lloyd-Jones DM, et al. Heart disease and stroke statistics--2011 update:  
404 a report from the American Heart Association. *Circulation* 2011; Feb 1;123(4):e18-e209.
- 405 6. Allender S, Scarborough P, Peto V, et al. European cardiovascular disease statistics, 2008  
406 ed. European Heart Network; 2008.
- 407 7. Despres JP, Lemieux I. Abdominal obesity and metabolic syndrome. *Nature* 2006; Dec  
408 14;444(7121):881-7.
- 409 8. Van Gaal LF, Mertens IL, De Block CE. Mechanisms linking obesity with cardiovascular  
410 disease. *Nature* 2006; Dec 14;444(7121):875-80.
- 411 9. Hansson GK. Inflammation, atherosclerosis, and coronary artery disease. *N Engl J Med*  
412 2005; Apr 21;352(16):1685-95.



- 1  
2  
3 413 10. Bhatia LS, Curzen NP, Byrne CD. Nonalcoholic fatty liver disease and vascular risk. *Curr*  
4  
5 414 *Opin Cardiol* 2012; Jul;27(4):420-8.  
6  
7  
8  
9 415 11. Treeprasertsuk S, Leverage S, Adams LA, et al. The Framingham risk score and heart  
10  
11 416 disease in nonalcoholic fatty liver disease. *Liver Int* 2012; Jul;32(6):945-50.  
12  
13  
14 417 12. Haring R, Wallaschofski H, Nauck M, et al. Ultrasonographic hepatic steatosis increases  
15  
16 418 prediction of mortality risk from elevated serum gamma-glutamyl transpeptidase levels.  
17  
18 419 *Hepatology* 2009; Nov;50(5):1403-11.  
19  
20  
21  
22 420 13. Lazo M, Hernaez R, Bonekamp S, et al. Non-alcoholic fatty liver disease and mortality  
23  
24 421 among US adults: prospective cohort study. *BMJ* 2011; Nov 18;343:d6891.  
25  
26  
27 422 14. Wong VW, Wong GL, Yip GW, et al. Coronary artery disease and cardiovascular  
28  
29 423 outcomes in patients with non-alcoholic fatty liver disease. *Gut* 2011; Dec;60(12):1721-7.  
30  
31  
32  
33 424 15. Loria P, Lonardo A, Targher G. Is liver fat detrimental to vessels?: intersections in the  
34  
35 425 pathogenesis of NAFLD and atherosclerosis. *Clin Sci (Lond)* 2008; Jul;115(1):1-12.  
36  
37  
38  
39 426 16. Targher G, Marra F, Marchesini G. Increased risk of cardiovascular disease in non-  
40  
41 427 alcoholic fatty liver disease: causal effect or epiphenomenon?. *Diabetologia* 2008;  
42  
43 428 Nov;51(11):1947-53.  
44  
45  
46 429 17. Targher G, Bertolini L, Scala L, et al. Non-alcoholic hepatic steatosis and its relation to  
47  
48 430 increased plasma biomarkers of inflammation and endothelial dysfunction in non-diabetic  
49  
50 431 men. Role of visceral adipose tissue. *Diabet Med* 2005; Oct;22(10):1354-8.  
51  
52  
53  
54  
55  
56  
57  
58  
59  
60

- 1  
2  
3 432 18. Brea A, Mosquera D, Martin E, et al. Nonalcoholic fatty liver disease is associated with  
4  
5 433 carotid atherosclerosis: a case-control study. *Arterioscler Thromb Vasc Biol* 2005;  
6  
7 434 May;25(5):1045-50.  
8  
9  
10 435 19. Sookoian S, Pirola CJ. Non-alcoholic fatty liver disease is strongly associated with carotid  
11  
12 436 atherosclerosis: a systematic review. *J Hepatol* 2008; Oct;49(4):600-7.  
13  
14  
15  
16 437 20. Fraser A, Harris R, Sattar N, et al. Gamma-glutamyltransferase is associated with incident  
17  
18 438 vascular events independently of alcohol intake: analysis of the British Women's Heart and  
19  
20 439 Health Study and Meta-Analysis. *Arterioscler Thromb Vasc Biol* 2007; Dec;27(12):2729-35.  
21  
22  
23  
24 440 21. Rantala AO, Kauma H, Lilja M, et al. Prevalence of the metabolic syndrome in drug-  
25  
26 441 treated hypertensive patients and control subjects. *J Intern Med* 1999; Feb;245(2):163-74.  
27  
28  
29 442 22. Yajima Y, Ohta K, Narui T, et al. Ultrasonographical diagnosis of fatty liver: significance  
30  
31 443 of the liver-kidney contrast. *Tohoku J Exp Med* 1983; Jan;139(1):43-50.  
32  
33  
34  
35 444 23. Sampi M, Veneskoski M, Ukkola O, et al. High plasma immunoglobulin (Ig) A and low  
36  
37 445 IgG antibody titers to oxidized low-density lipoprotein are associated with markers of glucose  
38  
39 446 metabolism. *J Clin Endocrinol Metab* 2010; May;95(5):2467-75.  
40  
41  
42  
43 447 24. Pisto P, Ukkola O, Santaniemi M, et al. Plasma adiponectin--an independent indicator of  
44  
45 448 liver fat accumulation. *Metabolism* 2011; Nov;60(11):1515-20.  
46  
47  
48  
49 449 25. Santaniemi M., Ukkola O., Malo E., et al. Metabolic syndrome in the prediction of  
50  
51 450 cardiovascular events: The potential additive role of hsCRP and adiponectin. *Eur J Prev*  
52  
53 451 *Cardiol* 2013; Jun;20.  
54  
55  
56  
57  
58  
59  
60

- 1  
2  
3 452 26. Pajunen P, Jousilahti P, Borodulin K, et al. Body fat measured by a near-infrared  
4  
5 453 interactance device as a predictor of cardiovascular events: the FINRISK'92 cohort. *Obesity*  
6  
7 454 (*Silver Spring*) 2011; Apr;19(4):848-52.
- 8  
9  
10 455 27. Katz A, Nambi SS, Mather K, et al. Quantitative insulin sensitivity check index: a simple,  
11  
12 456 accurate method for assessing insulin sensitivity in humans. *J Clin Endocrinol Metab* 2000;  
13  
14 457 Jul;85(7):2402-10.
- 15  
16  
17 458 28. Kauma H, Savolainen MJ, Rantala AO, et al. Apolipoprotein E phenotype determines the  
18  
19 459 effect of alcohol on blood pressure in middle-aged men. *Am J Hypertens* 1998; Nov;11(11 Pt  
20  
21 460 1):1334-43.
- 22  
23  
24 461 29. Bessebinders K, Wielders J, van de Wiel A. Severe hypertriglyceridemia influenced by  
25  
26 462 alcohol (SHIBA). *Alcohol Alcohol* 2011; Mar-Apr;46(2):113-6.
- 27  
28  
29 463 30. Hamaguchi M, Kojima T, Takeda N, et al. Nonalcoholic fatty liver disease is a novel  
30  
31 464 predictor of cardiovascular disease. *World J Gastroenterol* 2007; Mar 14;13(10):1579-84.
- 32  
33  
34 465 31. Stepanova M, Younossi ZM. Independent Association Between Nonalcoholic Fatty Liver  
35  
36 466 Disease and Cardiovascular Disease in the US Population. *Clin Gastroenterol Hepatol* 2012;  
37  
38 467 Jun;10(6):646-50.
- 39  
40  
41 468 32. Targher G, Bertolini L, Poli F, et al. Nonalcoholic fatty liver disease and risk of future  
42  
43 469 cardiovascular events among type 2 diabetic patients. *Diabetes* 2005; Dec;54(12):3541-6.
- 44  
45  
46 470 33. Ghouri N, Preiss D, Sattar N. Liver enzymes, nonalcoholic fatty liver disease, and incident  
47  
48 471 cardiovascular disease: a narrative review and clinical perspective of prospective data.  
49  
50 472 *Hepatology* 2010; Sep;52(3):1156-61.
- 51  
52  
53  
54  
55  
56  
57  
58  
59  
60

- 1  
2  
3 473 34. Dunn W, Xu R, Wingard DL, et al. Suspected nonalcoholic fatty liver disease and  
4  
5 474 mortality risk in a population-based cohort study. *Am J Gastroenterol* 2008; Sep;103(9):2263-  
6  
7 475 71.  
8  
9  
10 476 35. Ruttman E, Brant LJ, Concin H, et al. Gamma-glutamyltransferase as a risk factor for  
11  
12 477 cardiovascular disease mortality: an epidemiological investigation in a cohort of 163,944  
13  
14 478 Austrian adults. *Circulation* 2005; Oct 4;112(14):2130-7.  
15  
16  
17  
18 479 36. Soderberg C, Stal P, Askling J, et al. Decreased survival of subjects with elevated liver  
19  
20 480 function tests during a 28-year follow-up. *Hepatology* 2010; Feb;51(2):595-602.  
21  
22  
23  
24 481 37. Ekstedt M, Franzen LE, Mathiesen UL, et al. Long-term follow-up of patients with  
25  
26 482 NAFLD and elevated liver enzymes. *Hepatology* 2006; Oct;44(4):865-73.  
27  
28  
29  
30 483 38. Bhatia LS, Curzen NP, Calder PC, et al. Non-alcoholic fatty liver disease: a new and  
31  
32 484 important cardiovascular risk factor?. *Eur Heart J* 2012; May;33(10):1190-200.  
33  
34  
35 485 39. Beckman JA, Creager MA, Libby P. Diabetes and atherosclerosis: epidemiology,  
36  
37 486 pathophysiology, and management. *JAMA* 2002; May 15;287(19):2570-81.  
38  
39  
40  
41 487 40. Joseph P, Teo K. Optimal medical therapy, lifestyle intervention, and secondary  
42  
43 488 prevention strategies for cardiovascular event reduction in ischemic heart disease. *Curr*  
44  
45 489 *Cardiol Rep* 2011; Aug;13(4):287-95.  
46  
47  
48  
49 490 41. Dam-Larsen S, Franzmann M, Andersen IB, et al. Long term prognosis of fatty liver: risk  
50  
51 491 of chronic liver disease and death. *Gut* 2004; May;53(5):750-5.  
52  
53  
54 492 42. Calori G, Lattuada G, Ragogna F, et al. Fatty liver index and mortality: the Cremona  
55  
56 493 study in the 15th year of follow-up. *Hepatology* 2011; Jul;54(1):145-52.  
57  
58  
59  
60

- 1  
2  
3 494 43. Joy D, Thava VR, Scott BB. Diagnosis of fatty liver disease: is biopsy necessary?. *Eur J*  
4  
5 495 *Gastroenterol Hepatol* 2003; May;15(5):539-43.  
6  
7  
8 496 44. Dasarathy S, Dasarathy J, Khiyami A, et al. Validity of real time ultrasound in the  
9  
10 497 diagnosis of hepatic steatosis: a prospective study. *J Hepatol* 2009; Dec;51(6):1061-7.  
11  
12  
13 498 45. Szczepaniak LS, Nurenberg P, Leonard D, et al. Magnetic resonance spectroscopy to  
14  
15 499 measure hepatic triglyceride content: prevalence of hepatic steatosis in the general population.  
16  
17 500 *Am J Physiol Endocrinol Metab* 2005; Feb;288(2):E462-8.  
18  
19  
20  
21  
22 501  
23  
24  
25  
26  
27  
28  
29  
30  
31  
32  
33  
34  
35  
36  
37  
38  
39  
40  
41  
42  
43  
44  
45  
46  
47  
48  
49  
50  
51  
52  
53  
54  
55  
56  
57  
58  
59  
60

502

| <b>Grade of liver<br/>bightness</b>         | <b>0<br/>(n=720)</b> | <b>1<br/>(n=124)</b> | <b>2<br/>(n=144)</b> | <b>p</b> | <b>p<br/>(0-1)</b> | <b>p<br/>(1-2)</b> | <b>p<br/>(0-2)</b> |
|---------------------------------------------|----------------------|----------------------|----------------------|----------|--------------------|--------------------|--------------------|
| <b>Age (years)</b>                          | 50.9 (6.0)           | 51.9 (6.1)           | 51.5 (5.5)           | NS       | NS                 | NS                 | NS                 |
| <b>Males</b>                                | 44.3 %<br>(n=319)    | 65.3 %<br>(n=81)     | 59.9 %<br>(n=82)     | < 0.001  | -                  | -                  | -                  |
| <b>Hypertensives</b>                        | 41.4 %<br>(n=298)    | 66.1 %<br>(n=82)     | 71.5 %<br>(n=103)    | < 0.001  | -                  | -                  | -                  |
| <b>BMI (kg/m<sup>2</sup>)</b>               | 26.4 (3.9)           | 29.8 (5.0)           | 31.9 (4.9)           | < 0.001  | < 0.001            | < 0.001            | < 0.001            |
| <b>Waist circumference<br/>(cm)</b>         | 86.8 (11.9)          | 97.7 (12.0)          | 102.3<br>(11.8)      | < 0.001  | < 0.001            | < 0.01             | < 0.001            |
| <b>Smoking (pack years)</b>                 | 10.6 (13.3)          | 14.3 (14.9)          | 14.0 (14.6)          | < 0.05   | NS                 | NS                 | NS                 |
| <b>Alcohol consumption<br/>(g/week)</b>     | 51.1 (83.0)          | 95.1<br>(117.0)      | 82.6<br>(105.1)      | < 0.01   | < 0.05             | NS                 | NS                 |
| <b>Total serum cholesterol<br/>(mmol/L)</b> | 5.6 (1.0)            | 5.8 (1.1)            | 5.8 (1.1)            | NS       | NS                 | NS                 | NS                 |
| <b>LDL (mmol/L)</b>                         | 3.5 (0.9)            | 3.7 (1.1)            | 3.5 (0.9)            | NS       | NS                 | NS                 | NS                 |
| <b>Triglycerides (mmol/L)</b>               | 1.4 (0.8)            | 1.9 (0.8)            | 2.2 (1.4)            | < 0.001  | < 0.001            | < 0.05             | < 0.001            |
| <b>Systolic blood pressure</b>              | 145.2<br>(21.5)      | 152.7<br>(20.3)      | 157.1<br>(22.2)      | < 0.001  | < 0.01             | NS                 | < 0.001            |
| <b>Fasting insulin<br/>(mmol/L)</b>         | 10.8 (7.7)           | 18.2 (10.3)          | 23.8 (17.6)          | < 0.001  | < 0.001            | < 0.001            | < 0.001            |

|                                        |                    |                    |                    |         |         |         |         |
|----------------------------------------|--------------------|--------------------|--------------------|---------|---------|---------|---------|
| <b>Fasting glucose</b><br>(mmol/L)     | 4.4 (0.7)          | 5.0 (1.4)          | 6.1 (2.8)          | < 0.001 | < 0.001 | < 0.001 | < 0.001 |
| <b>QUICKI</b>                          | 0.6 (0.1)          | 0.6 (0.1)          | 0.5 (0.1)          | < 0.001 | < 0.001 | < 0.001 | < 0.001 |
| <b>hs-CRP (ng/mL)</b>                  | 3039.4<br>(6758.3) | 3981.4<br>(6068.2) | 6122.0<br>(6630.8) | < 0.001 | < 0.001 | < 0.01  | < 0.001 |
| <b>ALT U/L</b>                         | 26.2 (15.5)        | 37.8 (17.1)        | 55.4 (37.7)        | < 0.001 | < 0.001 | < 0.001 | < 0.001 |
| <b>GGT U/L</b>                         | 35.1 (33.5)        | 69.7<br>(116.3)    | 76.8 (92.4)        | < 0.001 | < 0.001 | < 0.01  | < 0.001 |
| <b>Anti-hypertensive<br/>treatment</b> | 43.6%<br>(n=314)   | 66.9%<br>(n=83)    | 72.9%<br>(n=105)   | < 0.001 | -       | -       | -       |
| <b>Lipid-lowering<br/>treatment</b>    | 2.2%<br>(n=16)     | 1.6% (n=2)         | 6.2% (n=9)         | < 0.05  | -       | -       | -       |
| <b>Hypoglycaemic drug</b>              | 1.1% (n=8)         | 1.6% (n=2)         | 10.4%<br>(n=15)    | < 0.001 | -       | -       | -       |
| <b>Type 2 diabetes</b>                 | 2.4%<br>(n=17)     | 12.1%<br>(n=15)    | 36.8%<br>(n=53)    | < 0.001 | -       | -       | -       |

503

504 **Table 1.** Baseline characteristics of the study group as means (standard deviations) or  
505 percentages. N= number of subjects. ALT, alanine aminotransferase, BMI, body mass index,  
506 GGT, gamma-glutamyltransferase, hs-CRP, high-sensitivity C-reactive protein, LDL, low-  
507 density lipoprotein, QUICKI, quantitative insulin sensitivity check index.

508

|                                  | Model 1             | Model 2             | Model 3             | Model 4             | Model 5              |
|----------------------------------|---------------------|---------------------|---------------------|---------------------|----------------------|
| <b>Moderate fat content</b>      | 1.51 (0.99-2.29)    | 1.44 (0.93-2.23)    | 1.31 (0.84-2.05)    | 1.30 (0.84-2.01)    | 1.49 (0.99-2.26)     |
| <b>Severe fat content</b>        | 1.92 (1.32-2.80)**  | 1.74 (1.16-2.63) ** | 1.49 (0.97-2.30)    | 1.43 (0.93-2.18)    | 1.76 (1.21- 2.56) ** |
| <b>Study group</b>               | 1.34 (0.98-1.85)    | 1.29 (0.92-1.80)    | 1.28 (0.92-1.78)    |                     |                      |
| <b>Age</b>                       | 1.06 (1.03-1.09)*** | 1.05(1.02-1.08)**   | 1.05 (1.02-1.08)**  | 1.05 (1.02-1.07)**  | 1.05 (1.02-1.08) **  |
| <b>Gender</b>                    | 2.39 (1.71-3.34)*   | 1.91 (1.34-2.71)*** | 1.80 (1.26-2.57)**  | 1.83 (1.29-2.60) ** | 1.92 (1.36-2.72) *** |
| <b>LDL-cholesterol</b>           |                     | 1.17 (0.99-1.39)    | 1.15 (0.97-1.37)    |                     |                      |
| <b>Smoking (pack-years)</b>      |                     | 1.02 (1.01-1.03)*** | 1.02 (1.01-1.03)*** | 1.02 (1.01-1.03)*** | 1.02 (1.01-1.03) *** |
| <b>Alcohol consumption (gr1)</b> |                     | 0.93 (0.59-1.45)    | 0.92(0.59-1.44)     |                     |                      |
| <b>Alcohol consumption (gr2)</b> |                     | 0.84 (0.44-1.60)    | 0.81(0.42-1.54)     |                     |                      |
| <b>Systolic blood pressure</b>   |                     | 1.01 (1.00-1.02)**  | 1.01 (1.00-1.02)*   | 1.01 (1.00-1.02)**  | 1.01 (1.00-1.02) **  |
| <b>Body mass index</b>           |                     | 0.99 (0.96-1.03)    | 0.97 (0.93-1.01)    |                     |                      |
| <b>QUICKI</b>                    |                     |                     | 0.12 (0.02-0.90)*   | 0.16 (0.03-0.99)*   |                      |

509

510



1  
2  
3 511 **Table 2.** Multivariate analysis for cardiovascular events with different degrees of adjustments  
4  
5 512 (Cox regression analysis). CVD event occurred in 13.5% of the subjects with no fat in the  
6  
7 513 liver (97/720), 24.2% (30/124) of subjects having moderate liver fat content and 29.2%  
8  
9 514 (42/144) of the subjects having severe fatty liver. Hazard ratios with 95% confidence interval  
10  
11 515 with different degrees of adjustments are presented. Alcohol consumption was divided into  
12  
13 516 groups (reference group: less than 1g/week in men and women, group 1: less than 210g/week  
14  
15 517 in men and less than 140 g/week in women, group 2: more than 210g/week in men and more  
16  
17 518 than 140g/week in women). Model 1: adjustment for study group, age and gender. Model 2:  
18  
19 519 further adjustments for LDL-cholesterol, smoking, alcohol consumption, systolic blood  
20  
21 520 pressure and body mass index. Model 3: further adjustment for QUICKI. Model 4:  
22  
23 521 adjustments with statistically significant covariates. Model 5: adjustments with statistically  
24  
25 522 significant covariates without QUICKI. LDL, low-density lipoprotein, QUICKI, quantitative  
26  
27 523 insulin sensitivity check index. \*\*\* p < 0.001, \*\* p < 0.01, \* p < 0.05.  
28  
29  
30  
31  
32  
33 524  
34  
35  
36 525  
37  
38  
39 526  
40  
41  
42  
43 527  
44  
45  
46 528  
47  
48  
49 529  
50  
51  
52  
53 530  
54  
55  
56  
57  
58  
59  
60

| Grade of liver<br>bightness | Total       | 0<br>(n=720) | 1<br>(n=124) | 2<br>(n=144) | p       |
|-----------------------------|-------------|--------------|--------------|--------------|---------|
| <b>Non-fatal events</b>     |             |              |              |              |         |
| <b>CVD</b>                  | 11.6% (115) | 9.9% (71)    | 16.1% (20)   | 16.7% (24)   | < 0.05  |
| <b>CHD</b>                  | 7.8% (77)   | 6.5% (47)    | 11.3% (14)   | 11.1% (16)   | NS      |
| <b>Stroke</b>               | 5.0% (49)   | 4.2% (30)    | 8.1% (10)    | 6.2% (9)     | NS      |
| <b>Fatal events</b>         |             |              |              |              |         |
| <b>CVD</b>                  | 5.5% (54)   | 3.6% (26)    | 8.1% (10)    | 12.5% (18)   | < 0.001 |
| <b>CHD</b>                  | 4.8% (47)   | 3.2% (23)    | 7.3% (9)     | 10.4% (15)   | < 0.01  |
| <b>Stroke</b>               | 0.8% (8)    | 0.6% (4)     | 0.8% (1)     | 2.1% (3)     | NS      |

531 **Table 3.** CVD, CHD and stroke follow-up data of the study group as percentages (number of  
532 events). Statistical significances between percentages were measured by using  $\chi^2$  test. CVD  
533 included a major CHD event and stroke (excluding subarachnoid hemorrhage) - whichever of  
534 these happened first. N=number of subjects. CHD, coronary heart disease, CVD,  
535 cardiovascular disease.

| Final model    | Cardiovascular event<br>c-index (95% CI) | Binary R <sup>2</sup> |     |
|----------------|------------------------------------------|-----------------------|-----|
|                |                                          |                       | 536 |
|                |                                          |                       | 537 |
|                |                                          |                       | 538 |
| <b>Model 3</b> | 0.729 (0.706-0.776)                      | 0.153                 | 539 |
|                |                                          |                       | 540 |
| <b>Model 4</b> | 0.720 (0.689-0.763)                      | 0.144                 |     |
|                |                                          |                       | 541 |
| <b>Model 5</b> | 0.717 (0.686-0.758)                      | 0.138                 |     |
|                |                                          |                       | 542 |
| <b>Model 1</b> | 0.698 (0.656-0.742)                      | 0.133                 |     |
|                |                                          |                       | 543 |

**Table 4.** Multivariate analysis for cardiovascular events (logistic regression analysis). Cardiovascular disease risk factors have been removed from the models step by step. Model 3 included liver brightness, study group, age, gender, smoking, alcohol consumption, systolic blood pressure, LDL-cholesterol level, body mass index and QUICKI. Model 4 included liver brightness, age, gender, smoking, blood pressure and QUICKI. Model 5 included liver brightness, age, gender, smoking, blood pressure. Model 1 included liver brightness, study group, age and gender. C-index with confidence intervals obtained from 250 bootstrap resamplings and binary R<sup>2</sup> was used. LDL, low-density lipoprotein, QUICKI, quantitative insulin sensitivity check index.

1  
2  
3  
4  
5  
6  
7  
8  
9  
10  
11  
12  
13  
14  
15  
16  
17  
18  
19  
20  
21  
22  
23  
24  
25  
26  
27  
28  
29  
30  
31  
32  
33  
34  
35  
36  
37  
38  
39  
40  
41  
42  
43  
44  
45  
46  
47  
48  
49  
50  
51  
52  
53  
54  
55  
56  
57  
58  
59  
60

553

For peer review only

1  
2  
3  
4  
5  
6  
7 **1 Fatty liver predicts the risk for cardiovascular events in middle-aged population: a**  
8 **2 population-based cohort study**

9  
10  
11  
12 3 Pauliina Pisto<sup>1</sup>, Merja Santaniemi<sup>1</sup>, Risto Bloigu<sup>2</sup>, Olavi Ukkola<sup>1</sup>, Y. Antero Kesäniemi<sup>1</sup>

13  
14  
15 4 <sup>1</sup>Institute of Clinical Medicine, Department of Internal Medicine and Biocenter Oulu,  
16 University of Oulu, and Clinical Research Center, Oulu University Hospital, Oulu, Finland,  
17 5 P.O. Box 20, 90029 OYS, Finland  
18 6

19  
20  
21 7 <sup>2</sup>Medical Informatics and Statistics Research Group, University of Oulu, Aapistie 7, P.O. Box  
22 8 5000, 90014 Oulu, Finland  
23  
24

25  
26 9 **Contact information:** Pauliina Pisto, corresponding author

27  
28  
29 10 University of Oulu

30  
31 11 Institute of Clinical Medicine

32  
33  
34 12 Department of Internal medicine

35  
36  
37 13 P.O. Box 5000, 90014 Oulu, Finland

38  
39  
40 14 Tel.: +35885376310

41  
42  
43 15 Fax: +35885376318

44  
45  
46 16 E-mail: pauliina.pisto@oulu.fi

47  
48 17 **Word count:** 6142

49  
50 18 **Keywords:** coronary disease, fatty liver, insulin resistance, risk factors, stroke

51  
52 19 **Financial support:** This study was supported by the Finnish Foundation for Cardiovascular  
53 20 Research, dated 16 Apr, 2012.  
54  
55  
56  
57  
58  
59  
60

1  
2  
3  
4  
5  
6  
7 21 **Disclosure summary:** Authors report no conflict of interests.  
8  
9 22

10 23 **ABSTRACT**

11  
12 24 **Objective:** We investigated if the differences in liver fat content would predict the  
13  
14 25 development of non-fatal and fatal atherosclerotic endpoints (coronary heart disease and  
15  
16 26 stroke).  
17

18 27 **Design, setting and participants:** Our study group is a population-based, randomly recruited  
19  
20 28 cohort (OPERA), initiated in 1991. The cohort consisted of 988 middle-aged Finnish subjects.  
21

22 29 **Intervention:** Total mortality and hospital events were followed up to 2009 based on the  
23  
24 30 registry of the National Institute for Health and Welfare and the National death registry.  
25

26 31 **Main outcome measure:** The severity of hepatic steatosis was measured by ultrasound and  
27  
28 32 divided into three groups (0-2). Cox regression analysis was used in the statistical analysis.  
29

30 33 **Results:** In the follow-up of years 1991-2009, 13.5% of the subjects with non-fatty liver,  
31  
32 34 24.2% of subjects having moderate liver fat content and 29.2% of the subjects having severe  
33  
34 35 fatty liver experienced a cardiovascular event during the follow-up time ( $p < 0.001$ ). Severe  
35  
36 36 liver fat content predicted the risk for future risk of cardiovascular event even when adjusted  
37  
38 37 for age, gender and study group (HR 1.92, CI 1.32-2.80,  $p < 0.01$ ). When further adjustments  
39  
40 38 for smoking, alcohol consumption, LDL-cholesterol, BMI and systolic blood pressure were  
41  
42 39 conducted, the risk still remained statistically significant (HR 1.74, CI 1.16-2.63,  $p < 0.01$ ).  
43  
44 40 Statistical significance disappeared with further adjustment for QUICKI.

45 41 **Conclusions:** Liver fat content increases the risk of future cardiovascular disease event in  
46  
47 42 long-term follow-up but it seems to be dependent on insulin sensitivity.  
48  
49 43  
50 44  
51 45  
52  
53  
54  
55  
56  
57  
58  
59  
60

1  
2  
3  
4  
5  
6  
7 46 **Article focus**

8  
9 47 1 To investigate if the differences in liver fat content predict the risk for development of fatal  
10  
11 48 or nonfatal atherosclerotic endpoints such as coronary heart disease and stroke.  
12  
13

14 49 **Key messages**

15  
16  
17 50 1 Subjects with ultrasound-diagnosed fatty liver have cardiovascular disease more often  
18  
19 51 compared to the subjects without fat in the liver  
20

21 52 2 Severe liver fat content increases the risk of a future cardiovascular event and mortality to  
22  
23 53 cardiovascular disease over the long-term follow-up but it does seem to be dependent on  
24  
25 54 insulin sensitivity  
26  
27

28 55 3 Severe fatty liver predicts the risk for overall mortality but the association is dependent on  
29  
30 56 traditional metabolic risk factors  
31  
32

33 57 **Strengths and limitations of the study**

34  
35 58 1 This is a follow-up study with a large population-based study group and a very long follow-  
36  
37 59 up time  
38  
39

40 60 2 Official registers used in event diagnoses - data is accurate and the classification is  
41  
42 61 systematic  
43  
44

45 62 3 Grade of liver brightness was measured by ultrasound, which has a high specificity but low  
46  
47 63 sensitivity  
48  
49 64

50  
51 65 **Introduction**  
52  
53  
54  
55  
56  
57  
58  
59  
60

1  
2  
3  
4  
5  
6  
7 66 Non-alcoholic fatty liver disease (NAFLD) refers to liver disorders such as abnormal fat  
8  
9 67 content, which exists in a spectrum ranging from steatosis with no inflammation to non-  
10  
11 68 alcoholic steatohepatitis (NASH), which can ultimately lead to liver cirrhosis <sup>1</sup>. The  
12  
13 69 prevalence of NAFLD is estimated to range from 20 to 30% of population in Western  
14  
15 70 countries, being the leading cause of liver disorders <sup>2,3</sup>. It is associated with obesity, type 2  
16  
17 71 diabetes mellitus (T2DM) and hyperlipidemia <sup>1</sup>. NAFLD is commonly regarded as a hepatic  
18  
19 72 manifestation of the metabolic syndrome and both conditions share several risk factors for  
20  
21 73 cardiovascular disease (CVD) <sup>3,4</sup>.

22  
23 74

24  
25  
26 75 In 2008, the prevalence of CVD in adults ( $\geq 20$  years) in United States was 36.2% <sup>5</sup>. Every  
27  
28 76 year, 4.3 million subjects die for CVD in Europe causing nearly half of the all deaths (48%) <sup>6</sup>.  
29  
30 77 So-called traditional risk factors for cardiovascular disease are age, gender, smoking, high  
31  
32 78 low-density lipoprotein (LDL) cholesterol concentration, hypertension and diabetes <sup>7</sup>. In  
33  
34 79 addition, total body fatness as well as abdominal fat accumulation increase independently the  
35  
36 80 risk of CVD and insulin resistance is regarded to be an important factor linking visceral  
37  
38 81 adiposity to cardiovascular risk <sup>8</sup>. Adipose tissue is now recognized as a significant endocrine  
39  
40 82 organ as adipocytes and macrophages infiltrating adipocytes secrete a number of bioactive  
41  
42 83 mediators <sup>7</sup>. Adipokines, proinflammatory cytokines and hypofibrinolytic markers may lead to  
43  
44 84 oxidative stress and endothelial dysfunction, finally leading to atherosclerosis <sup>9</sup>.

45  
46 85

47  
48  
49 86 Hepatic steatosis has been discussed as a possible mechanism to explain CVD morbidity and  
50  
51 87 mortality <sup>10</sup>. NAFLD patients have been reported to have higher coronary heart disease (CHD)  
52  
53 88 risk than the general population of the same age and gender <sup>11</sup>. According to previous study,



1  
2  
3  
4  
5  
6  
7 89 liver dysfunction associated with CVD mortality in men <sup>12</sup> whereas another large study found  
8  
9 90 no association between NAFLD and CVD in general population <sup>13</sup>. In addition, fatty liver did  
10  
11 91 not predict CVD mortality and morbidity in patients with established coronary artery disease  
12  
13 92 <sup>14</sup>.

14  
15 93  
16  
17  
18 94 The NAFLD and CVD share several molecular mechanisms <sup>15,16</sup>. Fatty liver might play a part  
19  
20 95 in the pathogenesis of CVD through the overexpression and systemic release of several  
21  
22 96 inflammatory, hemostatic <sup>17</sup> and oxidative-stress mediators or via contributing to whole-body  
23  
24 97 insulin resistance and atherogenic dyslipidemia <sup>3</sup>. NAFLD has also been reported to be linked  
25  
26 98 with circulatory endothelial dysfunction <sup>4,14</sup>. Several investigators have reported that NAFLD  
27  
28 99 is associated with coronary artery disease <sup>4,14</sup> and increased carotid intima-media thickness <sup>18</sup>,  
29  
30 100 <sup>19</sup>. Increased gamma-glutamyltransferase (GGT), which may be a marker of NAFLD, has  
31  
32 101 been reported to be associated with stroke <sup>20</sup>.

33  
34 102  
35  
36  
37 103 It is known that subjects with fatty liver disease have an increased risk of suffering CVD <sup>4</sup>, but  
38  
39 104 whether NAFLD is an independent indicator of cardiovascular disease is still far from clear.  
40  
41 105 Long-term follow-up studies are needed to clarify the correlation between fatty liver and  
42  
43 106 CVD. The aim of our study was to investigate if fatty liver could predict independently the  
44  
45 107 risk for total mortality as well as non-fatal and fatal cardiovascular endpoints with a 19-year  
46  
47 108 follow-up after adjusting for all known conventional risk factors.

48  
49  
50 109

51  
52 110 **Materials and methods**  
53  
54  
55  
56  
57  
58  
59  
60

1  
2  
3  
4  
5  
6  
7 111 **Human subjects**

8  
9 112 OPERA (Oulu Project Elucidating Risk of Atherosclerosis) is a population-based,  
10 113 epidemiological prospective cohort study designed to address the risk factors and disease end  
11 114 points of atherosclerotic cardiovascular diseases. Selection criteria of the study subjects have  
12 115 been described earlier<sup>21</sup>. In short, a total of 520 men and 525 women participated: 259 control  
13 116 men, 261 hypertensive men, 267 control women and 258 hypertensive women aged 40-59.  
14 117 Hypertensive participants were randomly selected from the national register for  
15 118 reimbursement of the costs of antihypertensive medication. For each hypertensive subject, an  
16 119 age- and sex-matched control subject was randomly selected from the same register. Informed  
17 120 consent in writing was obtained from each patient. The study protocol conformed to the  
18 121 ethical guidelines of the 1975 Declaration of Helsinki and this study was approved by the  
19 122 Ethical Committee of the Faculty of Medicine, University of Oulu.  
20  
21  
22  
23  
24  
25  
26  
27  
28  
29  
30  
31  
32  
33

34 124 **Determination of hepatic steatosis**

35  
36  
37 125 The determination of hepatic steatosis was based on liver-kidney contrast<sup>22</sup> measured with  
38 126 ultrasonography<sup>23</sup> by one trained radiologist with 10 years' experience in abdominal  
39 127 ultrasound examinations. Normal liver parenchyma should be slightly more echogenic (brighter)  
40 128 than the kidney parenchyma. In a case of increased liver echogenicity an ultrasound diagnosis of  
41 129 bright liver was settled. The severity of hepatic steatosis was based on the brightness of the liver  
42 130 and it was classified into three groups ranging from 0 to 2 (0 = normal bright, indicating a  
43 131 non-fatty liver, 1 = medium bright, a moderate lipid content and 2 = clearly bright, a severe  
44 132 lipid content and fatty liver)<sup>24</sup>.  
45  
46  
47  
48  
49  
50  
51  
52  
53  
54  
55  
56  
57  
58  
59  
60

1  
2  
3  
4  
5  
6  
7 134 **Follow-up**  
8

9 135 Both the hypertensive and the control men were recruited during December 1990 to May  
10 136 1992 and the women approximately one year later (n=1045). In total, 1023 subjects had a  
11 137 liver ultrasound result available at baseline. Mortality data were obtained from the National  
12 138 Death Registry and the diagnoses of cardiovascular events were based on the registry of the  
13 139 National Institute for Health and Welfare. The follow-up time ended December 31, 2009 or  
14 140 whenever the first event occurred. Cardiovascular events included fatal and non-fatal  
15 141 endpoints. Subjects with a previous hospital-diagnosed myocardial infarction or stroke (n=41)  
16 142 at baseline were excluded. In total, 988 subjects participated in this part of the study.  
17  
18  
19  
20  
21  
22  
23  
24  
25  
26  
27

28 144 CVD included a major CHD event and stroke (excluding subarachnoid hemorrhage, SAH) -  
29 145 whichever of these happened first<sup>25</sup>. The evidence of CHD was based on the following  
30 146 diagnosis: I20.0, I21, I22 [ICD-10, International Statistical Classification of Diseases and  
31 147 Related Health Problems] / 410, 4110 [ICD-8/9] as the main diagnosis (symptom or cause)  
32 148 and I21, I22 [ICD-10] / 410 [ICD-8/9] as a first side diagnosis (symptom or cause) or second  
33 149 side diagnosis (symptom or cause) and third side diagnosis (ICD-8/9 only) or if a subject had  
34 150 undergone coronary artery bypass graft (CABG) surgery or angioplasty. CHD as a cause of  
35 151 death included I20–I25, I46, R96, R98 [ICD-10] / 410-414, 798 (not 7980A) [ICD-8/9] as the  
36 152 underlying cause of death or immediate cause of death and I21 or I22 [ICD-10] / 410 [ICD-  
37 153 8/9] as first to third contributing cause of death. Stroke (excluding SAH) included I61, I63  
38 154 (not I636), I64 [ICD -10] / 431, 4330A, 4331A, 4339A, 4340A, 4341A, 4349A, 436 [ICD-9] /  
39 155 431 (except 43101, 43191) 433, 434, 436 [ICD-8] as main diagnosis (symptom or cause) or as  
40 156 a first or second side diagnosis (symptom or cause) or as a third side diagnosis (ICD-8/9 only)  
41  
42  
43  
44  
45  
46  
47  
48  
49  
50  
51  
52  
53  
54  
55  
56  
57  
58  
59  
60

1  
2  
3  
4  
5  
6  
7 157 or as an underlying cause of death or immediate cause of death or as a first to third  
8  
9 158 contributing cause of death <sup>26</sup>.

10  
11 159

12  
13  
14 160 **Laboratory analyses**

15  
16  
17 161 Waist circumference, body mass index (BMI) and blood pressure were measured as described  
18  
19 162 in previous study <sup>21</sup>.

20  
21 163

22  
23  
24 164 All the laboratory test samples were obtained after an overnight fast. Blood insulin and  
25  
26 165 glucose concentrations were analyzed at 0, 60, and 120 min after administration of 75 g  
27  
28 166 glucose <sup>24</sup>. Insulin sensitivity was assessed using fasting plasma insulin concentrations and a  
29  
30 167 quantitative insulin sensitivity check index (QUICKI) {QUICKI=1/[log (fasting insulin)+log  
31  
32 168 (fasting glucose)]} <sup>27</sup>.

33  
34  
35 169

36  
37  
38 170 Very-low-density lipoprotein (VLDL), high-density lipoprotein (HDL), low-density  
39  
40 171 lipoprotein (LDL) and hs-CRP concentrations <sup>24</sup> as well as alanine aminotransferase (ALT)  
41  
42 172 and GGT levels were measured as described previously <sup>23</sup>. Alcohol consumption and smoking  
43  
44 173 history were determined by validated questionnaires <sup>28</sup>. Alcohol consumption was divided into  
45  
46 174 three groups: 0 (n=161) mean alcohol consumption less than 1g/week in men and women, 1  
47  
48 175 (n=767) mean consumption less than 210g/week in men and less than 140 g/week in women,  
49  
50 176 2 (n=76) mean alcohol consumption more than 210g/week in men and more than 140g/week  
51  
52 177 in women. Group 2 designates large-scale alcohol consumers according to the guidelines <sup>29</sup>.

53  
54 178

55

56

57

58

59

60

1  
2  
3  
4  
5  
6  
7 179 **Statistical analysis**  
8

9 180 Statistical analysis was performed by using IBM SPSS Statistics for Windows, Version 20.0  
10  
11 181 (Armonk, NY: IBM Corp.). Analysis of variance was used to compare the means of the  
12  
13 182 variables measured. Post hoc tests were performed using the Tukey method. Statistical  
14  
15 183 significances between percentages were measured by using  $\chi^2$  test. Cumulative survival rates  
16  
17 184 were estimated using Kaplan-Meier method. Cox regression analysis was performed to  
18  
19 185 investigate if liver brightness (fat) could predict the future risk for total mortality,  
20  
21 186 cardiovascular death or hospital events. A p value < 0.05 was regarded as significant.  
22

23  
24 187

25  
26 188 Skewed variables (smoking, alcohol consumption, fasting insulin, fasting glucose,  
27  
28 189 triglyceride, ALT, GGT concentration, hs-CRP level) were logarithmically transformed to  
29  
30 190 improve normality before analysis of variance. We used three models with progressive  
31  
32 191 degrees of adjustments. Model 1 included study group (subjects with medicine-treated  
33  
34 192 hypertension and their age- and sex-matched controls), age and gender. Model 2 included  
35  
36 193 further adjustments for smoking, alcohol consumption, systolic blood pressure, LDL-  
37  
38 194 cholesterol level and body mass index. Model 3 included further adjustment for QUICKI. We  
39  
40 195 carried out sensitivity analyses: in the analyses of cardiovascular events, we added all  
41  
42 196 covariates one by one and investigated if the hazard ratios (HR) changed or remained stable  
43  
44 197 when further adjustment with one covariate was performed. Model 4 included variables which  
45  
46 198 were stable and were statistically significant in intermediate phases. Model 5 included stable  
47  
48 199 and significant covariates without QUICKI (Table 2).  
49

50 200  
51  
52  
53  
54  
55  
56  
57  
58  
59  
60

1  
2  
3  
4  
5  
6  
7 201 C-index was calculated for the model 1, model 3, model 4 and model 5 to assess the  
8  
9 202 discrimination of the risk markers. The analyses were performed in 250 bootstrap resamplings  
10  
11 203 to obtain 95% CI for c-index of each model.  
12  
13 204

## 16 205 **Results**

18  
19 206 The main baseline characteristics of the study group are shown in Table 1.  
20  
21 207

23  
24 208 *Table 1 about here*  
25  
26  
27 209

### 30 210 **Incidence of cardiovascular disease**

31  
32 211 The median follow-up time was 212 (maximum 228) months. During the follow-up time,  
33  
34 212 13.5% of the subjects with no fat in the liver (97/720), 24.2% (30/124) of subjects having  
35  
36 213 moderate liver fat content and 29.2% (42/144) of the subjects having severe fatty liver  
37  
38 214 experienced a CVD event ( $p < 0.001$ ). CVD was the cause of death in 3.6% of the subjects  
39  
40 215 with non-fatty liver (26/720) and 8.1% of the subjects with moderate liver fat content  
41  
42 216 (10/124), while 12.5% (18/144) of the subjects with severe fatty liver ( $p < 0.001$ ) (Table 3).  
43  
44  
45 217

46  
47  
48 218 Severe liver fat content predicted the risk for future risk of cardiovascular event when  
49  
50 219 adjusted for age, gender and study group (Model 1: HR 1.92, CI 1.32-2.80,  $p < 0.01$ ) (Table  
51  
52 220 2). When further adjustments were made for smoking, alcohol consumption, LDL-cholesterol,  
53  
54 221 BMI and systolic blood pressure (Model 2: HR 1.74, CI 1.16-2.63), the risk still remained  
55  
56  
57  
58  
59  
60

1  
2  
3  
4  
5  
6  
7 222 statistically significant ( $p < 0.01$ ). Statistical significance disappeared when further  
8  
9 223 adjustment for QUICKI was performed (Model 3: HR 1.49, CI 0.97-2.30,  $p=0.071$ ). In the  
10  
11 224 CVD event sensitivity analyses, all covariates were added one by one and it was examined  
12  
13 225 whether the hazard ratios would change or remain stable. After adjusting for the statistically  
14  
15 226 significant variables (including quick index) in the sensitivity analyses, the association  
16  
17 227 between severe fatty liver was no longer significant (Model 4: HR 1.43, CI 0.93-2.18,  
18  
19 228  $p=0.10$ ). When QUICKI was not added into Model 5, severe fatty liver did predict the risk for  
20  
21 229 future risk for CVD event (HR 1.76, CI 1.21- 2.56,  $p < 0.001$ ) (Table 2). The c-index  
22  
23 230 decreased when the risk factors were removed from the model (Table 4).  
23  
24  
25 231

26  
27 232 *Tables 2, 3 and 4 about here*  
28  
29

30 233  
31  
32  
33 234 The future risk of death from CVD in participants with severe fat content was significant  
34  
35 235 when age, gender and study group were added as covariates (Model 1: HR 2.95, CI 1.58-5.51,  
36  
37 236  $p < 0.01$ ). Even after further adjustments with other conventional risk factors (Model 2: HR  
38  
39 237 2.04, CI 1.03-4.05), statistical significance remained ( $p < 0.05$ ). When QUICKI was added as  
40  
41 238 the covariate, then significance disappeared (Model 3: HR 1.64, CI 0.79-3.43, NS) (Fig 1.).  
42  
43  
44 239

45  
46 240 *Figure 1 about here*  
47  
48

49 241

50  
51  
52 242 **Fatty liver and total mortality**  
53  
54  
55  
56  
57  
58  
59  
60

1  
2  
3  
4  
5  
6  
7 243 In total, 11.9% of the participants not having fatty liver, 18.5% of the subjects having  
8  
9 244 moderate fatty liver and 22.2% of the subjects with severe fatty liver died from all causes ( $p <$   
10 245 0.01). According to Model 1, severe fat content predicted the risk for mortality from all  
11  
12 246 causes when age, gender and study group were added as covariates (HR 1.60, CI 1.05-2.43,  $p$   
13  
14 247  $< 0.05$ ). The significance disappeared when body mass index was added as a covariate (data  
15  
16 248 not shown).

17  
18  
19 249  
20  
21 250 We performed all Cox regression analyses after excluding the men consuming more than 210  
22  
23 251 g alcohol and the women drinking more than 140 g alcohol per week. This exclusion did not  
24  
25 252 have any effect on the results (data not shown).

26  
27  
28 253 We performed all Cox regression analyses after excluding patients with insulin treated  
29  
30 254 diabetes mellitus ( $n=9$ ), cortisone treatment at baseline ( $n=41$ ) and previous diagnosis for  
31  
32 255 liver disease ( $n=15$ ) (e.g., virus, medications). This exclusion did not have any effect on the  
33  
34 256 results (data not shown).

### 35 36 37 257 **Discussion**

38  
39 258 The incidences of non-alcoholic fatty liver disease and cardiovascular disease are  
40  
41 259 continuously increasing in the Western world. The question if NAFLD is only a marker or  
42  
43 260 also an early mediator of cardiovascular disease is still largely unanswered. According to the  
44  
45 261 results of the present study, which had an approximately 19-year follow-up fatty liver does  
46  
47 262 predict the future risk for death from all causes, death from cardiovascular disease and risk of  
48  
49 263 cardiovascular events. Insulin sensitivity seems to play a more dominant role in the  
50  
51 264 development of cardiovascular events.

52  
53  
54 265



1  
2  
3  
4  
5  
6  
7 266 Only a few studies have investigated the risk for future cardiovascular risk among subjects  
8  
9 267 with ultrasound-diagnosed fatty liver <sup>30, 31</sup> and larger studies with longer follow-up times are  
10  
11 268 needed. An association between NAFLD and CVD has been reported <sup>3, 30-32</sup> although contrary  
12  
13 269 results also exist <sup>13, 33</sup>. A previous large population-based prospective cohort study found no  
14  
15 270 association between NAFLD and CVD, however they categorized the degree of steatosis as a  
16  
17 271 two level variable: none to mild and moderate to severe <sup>13</sup>. An association between  
18  
19 272 ultrasound-diagnosed fatty liver and CVD has been reported in general population <sup>30</sup> and in  
20  
21 273 subjects with T2DM <sup>32</sup>. Furthermore, liver dysfunction has been reported to associate with  
22  
23 274 CVD mortality <sup>34, 35</sup> and CHD risk <sup>11</sup> in follow-up studies and especially survival of subjects  
24  
25 275 with NASH is reported to be reduced <sup>33, 36, 37</sup>. In the present study, severe fatty liver disease did  
26  
27 276 predict the risk for cardiovascular death but the association seemed to be dependent on insulin  
28  
29 277 sensitivity.

30 278  
31  
32 279 Several earlier studies have used self-reported CVD history which may not be totally reliable.  
33  
34 280 Although earlier studies on the risk for future cardiovascular risk among subjects with fatty  
35  
36 281 liver have performed some adjustments, the full range of well-known CVD risk factors have  
37  
38 282 been rarely considered <sup>33</sup>. We have performed adjustments with all so-called traditional risk  
39  
40 283 factors for cardiovascular disease (i.e. age, gender, smoking, LDL concentration,  
41  
42 284 hypertension, insulin resistance). Previous studies have used biochemical, radiological and  
43  
44 285 histological methodology for NAFLD diagnosis and staging, which leads to a challenging  
45  
46 286 interpretation of the results <sup>35, 38</sup>.

47  
48 287  
49  
50  
51 288 This study had an approximately 19-year follow-up time, which is longer than in previous  
52  
53 289 studies <sup>11-14</sup>. When compared to earlier studies <sup>33, 38</sup> this study seems to be the first follow-up  
54  
55  
56  
57  
58  
59  
60

1  
2  
3  
4  
5  
6  
7 290 study with a large population-based randomly selected study group and a very long follow-up  
8  
9 291 time and ultrasound-diagnosed fatty liver. The diagnosis of cardiovascular events was based  
10  
11 292 on the registry of the National Institute for Health and Welfare and mortality data were  
12  
13 293 obtained from the National Death Registry. The earlier verified FINRISK classification <sup>26</sup> was  
14  
15 294 used to classify the events. Therefore, the reliability of event diagnosis data is accurate and  
16  
17 295 the classification is systematic. All subjects who had myocardial infarction or stroke before  
18  
19 296 baseline were excluded because a history of myocardial infarction is known to increase the  
20  
21 297 risk for recurrent myocardial infarction or cardiovascular death <sup>39</sup> and medication as well as  
22  
23 298 lifestyle secondary prevention strategies are intensive <sup>40</sup>.

24  
25 299  
26  
27  
28 300 There are a few follow-up-studies examining whether the fatty liver increases the risk for total  
29  
30 301 mortality <sup>13,41</sup>. In the present study, severe fatty liver predicted the risk for overall mortality of  
31  
32 302 any causes when age, gender and study group were added covariates, a result in line with an  
33  
34 303 earlier report <sup>42</sup>. In the published literature, NASH rather than simple steatosis has been stated  
35  
36 304 to be linked with decreased overall survival <sup>36</sup> although one study with a large cohort found no  
37  
38 305 association between NAFLD and overall mortality <sup>13</sup>. In our study, the association between  
39  
40 306 severe fatty liver and total mortality disappeared after further adjustment for BMI which  
41  
42 307 means that severe fatty liver is not a strong predictor for overall mortality.

43  
44 308  
45  
46  
47 309 The molecular mechanisms linking fatty liver with CVD have been investigated <sup>10, 16</sup>.  
48  
49 310 Enlarged visceral adipose tissue may explain why NAFLD associates with CVD <sup>16</sup>. In  
50  
51 311 individuals with visceral obesity, insulin resistance may contribute to impaired non-esterified  
52  
53 312 fatty acid (NEFA) metabolism <sup>8</sup> and the increasing NEFA flux to the liver may impair liver

1  
2  
3  
4  
5  
6  
7 313 metabolism leading to increased glucose metabolism and liver dysfunction <sup>7</sup>. The liver is one  
8  
9 314 of the targets of the resulting systemic abnormalities and the source of several proatherogenic  
10  
11 315 factors <sup>3</sup>, such as CRP, fibrinogen, plasminogen activator inhibitor-1 and other inflammatory  
12  
13 316 cytokines <sup>16</sup>. Furthermore, visceral adipose tissue and ectopic fat overexpress factors involved  
14  
15 317 in atherogenesis <sup>16</sup> such as NEFAs and proinflammatory cytokines, for instance interleukin-6  
16  
17 318 and tumor necrosis factor- $\alpha$  <sup>8</sup> leading to chronic systemic inflammation. In addition, hepatic  
18  
19 319 steatosis leads to overproduction of cholesterol-rich remnant particles <sup>4</sup>.

20  
21 320  
22  
23 321 One limitation in this study is that the grade of liver brightness was measured by ultrasound.  
24  
25 322 The invasive diagnostic technique of liver biopsy is regarded as the “golden standard”,  
26  
27 323 especially for the diagnosis of NASH <sup>43</sup>. Real time ultrasound using a combination of  
28  
29 324 sonographic findings does have a high specificity but it underestimates the prevalence of  
30  
31 325 hepatic steatosis when there is less than 20 % fat <sup>44</sup>. Today, magnetic resonance spectroscopy  
32  
33 326 is regarded as the best method for the quantification of liver fat, but this method is limited due  
34  
35 327 to its availability <sup>45</sup>. Unfortunately quantitative measurement of liver fat by ultrasound is  
36  
37 328 subject to several limitations compared to more validated and standardized methods for  
38  
39 329 diagnosing NAFLD and the analysis of intra-observer reproducibility could have been more  
40  
41 330 accurate in the present study. Nonetheless, the noninvasive ultrasound method was chosen  
42  
43 331 because taking liver biopsies from large groups of symptomless subjects would have been  
44  
45 332 ethically unjustifiable and magnetic resonance spectroscopy was not available at the baseline.

Comment [PP1]: Sentence added

46  
47 333  
48  
49  
50 334 The OPERA study group consists of subjects with drug-treated hypertension and randomly  
51  
52 335 selected sex- and age-matched controls. Study group was added as a covariate to minimize  
53  
54 336 any selection bias.

1  
2  
3  
4  
5  
6  
7 337 **Conclusions**

8  
9 338 Severe liver fat content increased the risk of a future cardiovascular event and mortality to  
10  
11 339 cardiovascular disease over the long-term follow-up but it seemed to be dependent on insulin  
12  
13 340 sensitivity. Fatty liver also predicted the risk for overall mortality. However, conventional  
14  
15 341 cardiovascular disease risk factors seemed to play a major role in developing death from all  
16  
17 342 causes. It would be beneficial to investigate larger cohorts and follow-up studies in order to  
18  
19 343 validate this result.

20  
21  
22 344

23  
24 345 **Figure legend**

25  
26  
27 346 Title: Kaplan Meier cumulative survival rates censored for cardiovascular death in subjects  
28  
29 347 with no fat in the liver, moderate fat content and severe fat content.

30  
31  
32 348 CVD was the cause of death in 3.6% of the subjects (26/720) with non-fatty liver and 8.1%  
33  
34 349 of the subjects (10/124) with moderate liver fat content, while 12.5% of the subjects with  
35  
36 350 severe fatty liver (18/144). Cox regression analysis is used for adjustments. M1 (Model 1):  
37  
38 351 adjusted for study group, age and gender. M2 (Model 2): further adjustments for smoking,  
39  
40 352 alcohol consumption, systolic blood pressure, LDL-cholesterol level and body mass index.  
41  
42 353 M3 (Model 3): further adjustment for QUICKI. CVD, cardiovascular disease, CI, confidence  
43  
44 354 interval, HR, hazard ratio, QUICKI, quantitative insulin sensitivity check index. \*\*  $p < 0.01$ ,  
45  
46 355 \*  $p < 0.05$ .

47  
48 356

49  
50  
51 357 **Acknowledgements**

1  
2  
3  
4  
5  
6  
7 358 The authors thank Markku Päivänsalo, MD, PhD, for the expert liver ultrasound examinations  
8  
9 359 and Ms Saija Kortetjärvi, Ms Liisa Mannermaa, and Ms Leena Ukkola for the excellent  
10  
11 360 technical assistance. M.Sc. Elina Malo and M.Sc. Meiju Saukko are thanked for the  
12  
13 361 cooperation in organizing cardiovascular event and mortality data.  
14

15 362

16  
17  
18 363 **Contributor statement:** All authors fulfill all three of the ICMJE guidelines for authorship  
19

20  
21 364 **Pauliina Pisto:** Data acquisition, statistical analysis and interpretation of data, manuscript  
22  
23 365 writing, final approval of the version to be published  
24

25  
26 366 **Merja Santaniemi:** Data acquisition, statistical analysis and data interpretation, critical  
27  
28 367 revision of the manuscript, final approval of the version to be published  
29

30  
31 368 **Risto Bloigu:** Data analysis, interpretation of data, critical revision of the manuscript, final  
32  
33 369 approval of the version to be published  
34

35  
36 370 **Olavi Ukkola:** Study design, data acquisition, data interpretation, critical revision of the  
37  
38 371 manuscript, final approval of the version to be published  
39

40  
41 372 **Y.A Kesäniemi:** Study design, data acquisition, data interpretation, critical revision of the  
42  
43 373 manuscript, final approval of the version to be published  
44

45 374

46  
47  
48 375 **Data sharing statement:** Extra data is available by emailing pauliina.pisto(at)oulu.fi  
49

50 376

51 377

52

53

54

55

56

57

58

59

60

378

379 **References**

380 **1. Angulo P. Nonalcoholic fatty liver disease. *N Engl J Med* 2002; Apr 18;346(16):1221-**  
381 **31.**

382 **2. Armstrong MJ, Houlihan DD, Bentham L, Shaw JC, Cramb R, Olliff S, et al.**  
383 **Presence and severity of non-alcoholic fatty liver disease in a large prospective primary**  
384 **care cohort. *J Hepatol* 2012; Jan;56(1):234-40.**

385 **3. Targher G, Day CP, Bonora E. Risk of cardiovascular disease in patients with**  
386 **nonalcoholic fatty liver disease. *N Engl J Med* 2010; Sep 30;363(14):1341-50.**

387 **4. Targher G, Arcaro G. Non-alcoholic fatty liver disease and increased risk of**  
388 **cardiovascular disease. *Atherosclerosis* 2007; Apr;191(2):235-40.**

389 **5. Roger VL, Go AS, Lloyd-Jones DM, Adams RJ, Berry JD, Brown TM, et al. Heart**  
390 **disease and stroke statistics--2011 update: a report from the American Heart**  
391 **Association. *Circulation* 2011; Feb 1;123(4):e18-e209.**

392 **6. Allender S, Scarborough P, Peto V, Rayner M, Leal J, Luengo-Fernandez R, Gray A.**  
393 **European cardiovascular disease statistics, 2008 ed. European Heart Network; 2008.**

394 **7. Despres JP, Lemieux I. Abdominal obesity and metabolic syndrome. *Nature* 2006; Dec**  
395 **14;444(7121):881-7.**

396 **8. Van Gaal LF, Mertens IL, De Block CE. Mechanisms linking obesity with**  
397 **cardiovascular disease. *Nature* 2006; Dec 14;444(7121):875-80.**

- 1  
2  
3  
4  
5  
6  
7 398 9. Hansson GK. Inflammation, atherosclerosis, and coronary artery disease. *N Engl J*  
8  
9 399 *Med* 2005; Apr 21;352(16):1685-95.  
10  
11 400 10. Bhatia LS, Curzen NP, Byrne CD. Nonalcoholic fatty liver disease and vascular risk.  
12  
13 401 *Curr Opin Cardiol* 2012; Jul;27(4):420-8.  
14  
15  
16 402 11. Treeprasertsuk S, Leverage S, Adams LA, Lindor KD, St Sauver J, Angulo P. The  
17  
18 403 Framingham risk score and heart disease in nonalcoholic fatty liver disease. *Liver Int*  
19  
20 404 2012; Jul;32(6):945-50.  
21  
22  
23 405 12. Haring R, Wallaschofski H, Nauck M, Dorr M, Baumeister SE, Volzke H.  
24  
25 406 Ultrasonographic hepatic steatosis increases prediction of mortality risk from elevated  
26  
27 407 serum gamma-glutamyl transpeptidase levels. *Hepatology* 2009; Nov;50(5):1403-11.  
28  
29  
30 408 13. Lazo M, Hernaez R, Bonekamp S, Kamel IR, Brancati FL, Guallar E, et al. Non-  
31  
32 409 alcoholic fatty liver disease and mortality among US adults: prospective cohort study.  
33  
34 410 *BMJ* 2011; Nov 18;343:d6891.  
35  
36  
37 411 14. Wong VW, Wong GL, Yip GW, Lo AO, Limquiaco J, Chu WC, et al. Coronary  
38  
39 412 artery disease and cardiovascular outcomes in patients with non-alcoholic fatty liver  
40  
41 413 disease. *Gut* 2011; Dec;60(12):1721-7.  
42  
43  
44 414 15. Loria P, Lonardo A, Targher G. Is liver fat detrimental to vessels?: intersections in  
45  
46 415 the pathogenesis of NAFLD and atherosclerosis. *Clin Sci (Lond)* 2008; Jul;115(1):1-12.  
47  
48  
49 416 16. Targher G, Marra F, Marchesini G. Increased risk of cardiovascular disease in non-  
50  
51 417 alcoholic fatty liver disease: causal effect or epiphenomenon?. *Diabetologia* 2008;  
52 418 Nov;51(11):1947-53.  
53  
54  
55  
56  
57  
58  
59  
60

- 1  
2  
3  
4  
5  
6  
7 419 17. Targher G, Bertolini L, Scala L, Zoppini G, Zenari L, Falezza G. Non-alcoholic  
8  
9 420 hepatic steatosis and its relation to increased plasma biomarkers of inflammation and  
10  
11 421 endothelial dysfunction in non-diabetic men. Role of visceral adipose tissue. *Diabet Med*  
12  
13 422 2005; Oct;22(10):1354-8.
- 14  
15 423 18. Brea A, Mosquera D, Martin E, Arizti A, Cordero JL, Ros E. Nonalcoholic fatty  
16  
17 424 liver disease is associated with carotid atherosclerosis: a case-control study. *Arterioscler*  
18  
19 425 *Thromb Vasc Biol* 2005; May;25(5):1045-50.
- 20  
21  
22 426 19. Sookoian S, Pirola CJ. Non-alcoholic fatty liver disease is strongly associated with  
23  
24 427 carotid atherosclerosis: a systematic review. *J Hepatol* 2008; Oct;49(4):600-7.
- 25  
26  
27 428 20. Fraser A, Harris R, Sattar N, Ebrahim S, Smith GD, Lawlor DA. Gamma-  
28  
29 429 glutamyltransferase is associated with incident vascular events independently of alcohol  
30  
31 430 intake: analysis of the British Women's Heart and Health Study and Meta-Analysis.  
32  
33 431 *Arterioscler Thromb Vasc Biol* 2007; Dec;27(12):2729-35.
- 34  
35  
36 432 21. Rantala AO, Kauma H, Lilja M, Savolainen MJ, Reunanen A, Kesaniemi YA.  
37  
38 433 Prevalence of the metabolic syndrome in drug-treated hypertensive patients and control  
39  
40 434 subjects. *J Intern Med* 1999; Feb;245(2):163-74.
- 41  
42  
43 435 22. Yajima Y, Ohta K, Narui T, Abe R, Suzuki H, Ohtsuki M. Ultrasonographical  
44  
45 436 diagnosis of fatty liver: significance of the liver-kidney contrast. *Tohoku J Exp Med*  
46  
47 437 1983; Jan;139(1):43-50.
- 48  
49 438 23. Sampi M, Veneskoski M, Ukkola O, Kesaniemi YA, Horkko S. High plasma  
50  
51 439 immunoglobulin (Ig) A and low IgG antibody titers to oxidized low-density lipoprotein  
52  
53  
54  
55  
56  
57  
58  
59  
60



- 1  
2  
3  
4  
5  
6  
7 440 are associated with markers of glucose metabolism. *J Clin Endocrinol Metab* 2010;  
8  
9 441 May;95(5):2467-75.
- 10  
11 442 24. Pisto P, Ukkola O, Santaniemi M, Kesaniemi YA. Plasma adiponectin--an  
12  
13 443 independent indicator of liver fat accumulation. *Metabolism* 2011; Nov;60(11):1515-20.
- 14  
15  
16 444 25. Santaniemi M, Ukkola O, Malo E., Bloigu R., Kesaniemi YA. Metabolic syndrome  
17  
18 445 in the prediction of cardiovascular events: The potential additive role of hsCRP and  
19  
20 446 adiponectin. *Eur J Prev Cardiol* 2013; Jun;20.
- 21  
22  
23 447 26. Pajunen P, Jousilahti P, Borodulin K, Harald K, Tuomilehto J, Salomaa V. Body fat  
24  
25 448 measured by a near-infrared interactance device as a predictor of cardiovascular  
26  
27 449 events: the FINRISK'92 cohort. *Obesity (Silver Spring)* 2011; Apr;19(4):848-52.
- 28  
29  
30 450 27. Katz A, Nambi SS, Mather K, Baron AD, Follmann DA, Sullivan G, et al.  
31  
32 451 Quantitative insulin sensitivity check index: a simple, accurate method for assessing  
33  
34 452 insulin sensitivity in humans. *J Clin Endocrinol Metab* 2000; Jul;85(7):2402-10.
- 35  
36  
37 453 28. Kauma H, Savolainen MJ, Rantala AO, Lilja M, Kervinen K, Reunanen A, et al.  
38  
39 454 Apolipoprotein E phenotype determines the effect of alcohol on blood pressure in  
40  
41 455 middle-aged men. *Am J Hypertens* 1998; Nov;11(11 Pt 1):1334-43.
- 42  
43  
44 456 29. Bessembinders K, Wielders J, van de Wiel A. Severe hypertriglyceridemia  
45  
46 457 influenced by alcohol (SHIBA). *Alcohol Alcohol* 2011; Mar-Apr;46(2):113-6.
- 47  
48  
49 458 30. Hamaguchi M, Kojima T, Takeda N, Nagata C, Takeda J, Sarui H, et al.  
50  
51 459 Nonalcoholic fatty liver disease is a novel predictor of cardiovascular disease. *World J*  
52  
53 460 *Gastroenterol* 2007; Mar 14;13(10):1579-84.
- 54  
55  
56  
57  
58  
59  
60

- 1  
2  
3  
4  
5  
6  
7 461 31. Stepanova M, Younossi ZM. Independent Association Between Nonalcoholic Fatty  
8  
9 462 Liver Disease and Cardiovascular Disease in the US Population. *Clin Gastroenterol*  
10  
11 463 *Hepatol* 2012; Jun;10(6):646-50.  
12  
13  
14 464 32. Targher G, Bertolini L, Poli F, Rodella S, Scala L, Tessari R, et al. Nonalcoholic fatty  
15  
16 465 liver disease and risk of future cardiovascular events among type 2 diabetic patients.  
17  
18 466 *Diabetes* 2005; Dec;54(12):3541-6.  
19  
20 467 33. Ghouri N, Preiss D, Sattar N. Liver enzymes, nonalcoholic fatty liver disease, and  
21  
22 468 incident cardiovascular disease: a narrative review and clinical perspective of  
23  
24 469 prospective data. *Hepatology* 2010; Sep;52(3):1156-61.  
25  
26  
27 470 34. Dunn W, Xu R, Wingard DL, Rogers C, Angulo P, Younossi ZM, et al. Suspected  
28  
29 471 nonalcoholic fatty liver disease and mortality risk in a population-based cohort study.  
30  
31 472 *Am J Gastroenterol* 2008; Sep;103(9):2263-71.  
32  
33  
34 473 35. Ruttman E, Brant LJ, Concin H, Diem G, Rapp K, Ulmer H, et al. Gamma-  
35  
36 474 glutamyltransferase as a risk factor for cardiovascular disease mortality: an  
37  
38 475 epidemiological investigation in a cohort of 163,944 Austrian adults. *Circulation* 2005;  
39  
40 476 Oct 4;112(14):2130-7.  
41  
42  
43 477 36. Soderberg C, Stal P, Askling J, Glaumann H, Lindberg G, Marmur J, et al.  
44  
45 478 Decreased survival of subjects with elevated liver function tests during a 28-year follow-  
46  
47 479 up. *Hepatology* 2010; Feb;51(2):595-602.  
48  
49  
50 480 37. Ekstedt M, Franzen LE, Mathiesen UL, Thorelius L, Holmqvist M, Bodemar G, et  
51  
52 481 al. Long-term follow-up of patients with NAFLD and elevated liver enzymes. *Hepatology*  
53  
54 482 2006; Oct;44(4):865-73.  
55  
56  
57  
58  
59  
60

- 1  
2  
3  
4  
5  
6  
7 483 38. Bhatia LS, Curzen NP, Calder PC, Byrne CD. Non-alcoholic fatty liver disease: a  
8  
9 484 new and important cardiovascular risk factor?. *Eur Heart J* 2012; May;33(10):1190-200.  
10  
11 485 39. Beckman JA, Creager MA, Libby P. Diabetes and atherosclerosis: epidemiology,  
12  
13 486 pathophysiology, and management. *JAMA* 2002; May 15;287(19):2570-81.  
14  
15  
16 487 40. Joseph P, Teo K. Optimal medical therapy, lifestyle intervention, and secondary  
17  
18 488 prevention strategies for cardiovascular event reduction in ischemic heart disease. *Curr*  
19  
20 489 *Cardiol Rep* 2011; Aug;13(4):287-95.  
21  
22  
23 490 41. Dam-Larsen S, Franzmann M, Andersen IB, Christoffersen P, Jensen LB, Sorensen  
24  
25 491 TI, et al. Long term prognosis of fatty liver: risk of chronic liver disease and death. *Gut*  
26  
27 492 2004; May;53(5):750-5.  
28  
29  
30 493 42. Calori G, Lattuada G, Ragona F, Garancini MP, Crosignani P, Villa M, et al. Fatty  
31  
32 494 liver index and mortality: the Cremona study in the 15th year of follow-up. *Hepatology*  
33  
34 495 2011; Jul;54(1):145-52.  
35  
36 496 43. Joy D, Thava VR, Scott BB. Diagnosis of fatty liver disease: is biopsy necessary?. *Eur*  
37  
38 497 *J Gastroenterol Hepatol* 2003; May;15(5):539-43.  
39  
40  
41 498 44. Dasarathy S, Dasarathy J, Khiyami A, Joseph R, Lopez R, McCullough AJ. Validity  
42  
43 499 of real time ultrasound in the diagnosis of hepatic steatosis: a prospective study. *J*  
44  
45 500 *Hepatol* 2009; Dec;51(6):1061-7.  
46  
47  
48 501 45. Szczepaniak LS, Nurenberg P, Leonard D, Browning JD, Reingold JS, Grundy S, et  
49  
50 502 al. Magnetic resonance spectroscopy to measure hepatic triglyceride content: prevalence  
51  
52 503 of hepatic steatosis in the general population. *Am J Physiol Endocrinol Metab* 2005;  
53  
54 504 Feb;288(2):E462-8.  
55  
56  
57  
58  
59  
60

1  
2  
3  
4  
5  
6  
7  
8  
9  
10  
11  
12  
13  
14  
15  
16  
17  
18  
19  
20  
21  
22  
23  
24  
25  
26  
27  
28  
29  
30  
31  
32  
33  
34  
35  
36  
37  
38  
39  
40  
41  
42  
43  
44  
45  
46  
47  
48  
49  
50  
51  
52  
53  
54  
55  
56  
57  
58  
59  
60

505

For peer review only

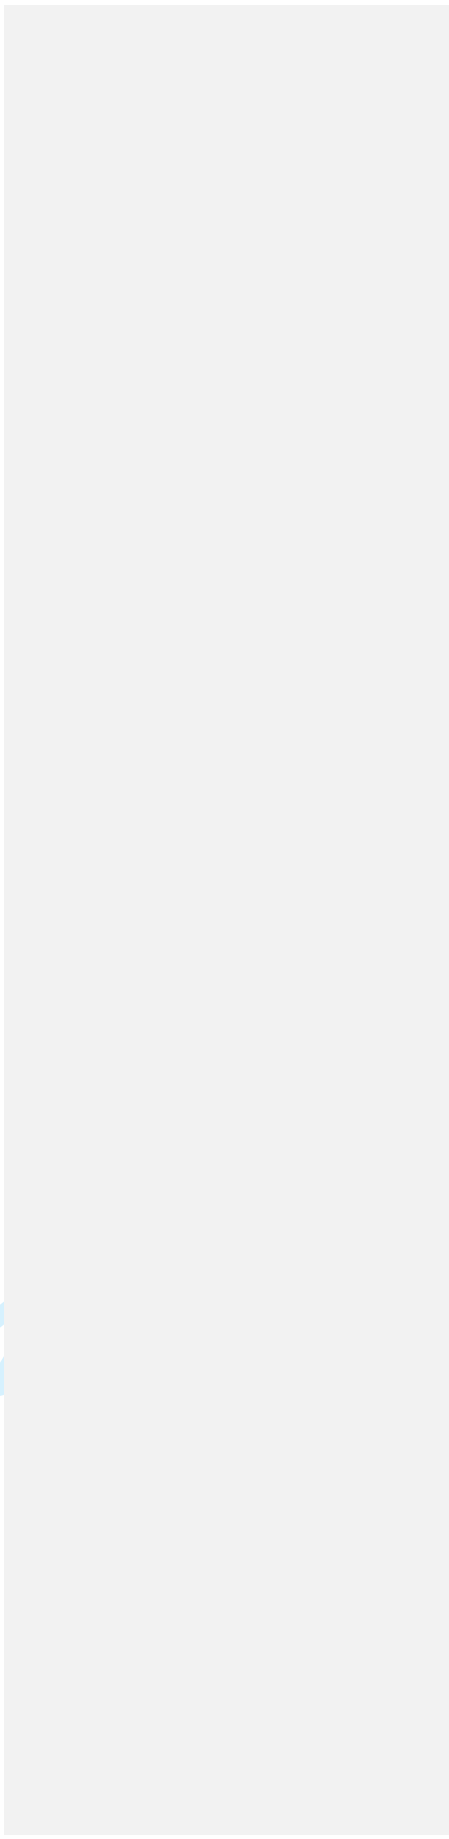

506

| Grade of liver<br>bightness         | 0<br>(n=720)      | 1<br>(n=124)     | 2<br>(n=144)      | p       | p<br>(0-1) | p<br>(1-2) | p<br>(0-2) |
|-------------------------------------|-------------------|------------------|-------------------|---------|------------|------------|------------|
| Age (years)                         | 50.9 (6.0)        | 51.9 (6.1)       | 51.5 (5.5)        | NS      | NS         | NS         | NS         |
| Males                               | 44.3 %<br>(n=319) | 65.3 %<br>(n=81) | 59.9 %<br>(n=82)  | < 0.001 | -          | -          | -          |
| Hypertensives                       | 41.4 %<br>(n=298) | 66.1 %<br>(n=82) | 71.5 %<br>(n=103) | < 0.001 | -          | -          | -          |
| BMI (kg/m <sup>2</sup> )            | 26.4 (3.9)        | 29.8 (5.0)       | 31.9 (4.9)        | < 0.001 | < 0.001    | < 0.001    | < 0.001    |
| Waist circumference<br>(cm)         | 86.8 (11.9)       | 97.7 (12.0)      | 102.3<br>(11.8)   | < 0.001 | < 0.001    | < 0.01     | < 0.001    |
| Smoking (pack years)                | 10.6 (13.3)       | 14.3 (14.9)      | 14.0 (14.6)       | < 0.05  | NS         | NS         | NS         |
| Alcohol consumption<br>(g/week)     | 51.1 (83.0)       | 95.1<br>(117.0)  | 82.6<br>(105.1)   | < 0.01  | < 0.05     | NS         | NS         |
| Total serum cholesterol<br>(mmol/L) | 5.6 (1.0)         | 5.8 (1.1)        | 5.8 (1.1)         | NS      | NS         | NS         | NS         |
| LDL (mmol/L)                        | 3.5 (0.9)         | 3.7 (1.1)        | 3.5 (0.9)         | NS      | NS         | NS         | NS         |
| Triglycerides (mmol/L)              | 1.4 (0.8)         | 1.9 (0.8)        | 2.2 (1.4)         | < 0.001 | < 0.001    | < 0.05     | < 0.001    |
| Systolic blood pressure             | 145.2<br>(21.5)   | 152.7<br>(20.3)  | 157.1<br>(22.2)   | < 0.001 | < 0.01     | NS         | < 0.001    |
| Fasting insulin<br>(mmol/L)         | 10.8 (7.7)        | 18.2 (10.3)      | 23.8 (17.6)       | < 0.001 | < 0.001    | < 0.001    | < 0.001    |

|                                        |                    |                    |                    |         |         |         |         |
|----------------------------------------|--------------------|--------------------|--------------------|---------|---------|---------|---------|
| <b>Fasting glucose</b><br>(mmol/L)     | 4.4 (0.7)          | 5.0 (1.4)          | 6.1 (2.8)          | < 0.001 | < 0.001 | < 0.001 | < 0.001 |
| <b>QUICKI</b>                          | 0.6 (0.1)          | 0.6 (0.1)          | 0.5 (0.1)          | < 0.001 | < 0.001 | < 0.001 | < 0.001 |
| <b>hs-CRP (ng/mL)</b>                  | 3039.4<br>(6758.3) | 3981.4<br>(6068.2) | 6122.0<br>(6630.8) | < 0.001 | < 0.001 | < 0.01  | < 0.001 |
| <b>ALT U/L</b>                         | 26.2 (15.5)        | 37.8 (17.1)        | 55.4 (37.7)        | < 0.001 | < 0.001 | < 0.001 | < 0.001 |
| <b>GGT U/L</b>                         | 35.1 (33.5)        | 69.7<br>(116.3)    | 76.8 (92.4)        | < 0.001 | < 0.001 | < 0.01  | < 0.001 |
| <b>Anti-hypertensive<br/>treatment</b> | 43.6%<br>(n=314)   | 66.9%<br>(n=83)    | 72.9%<br>(n=105)   | < 0.001 | -       | -       | -       |
| <b>Lipid-lowering<br/>treatment</b>    | 2.2%<br>(n=16)     | 1.6% (n=2)         | 6.2% (n=9)         | < 0.05  | -       | -       | -       |
| <b>Hypoglycaemic drug</b>              | 1.1% (n=8)         | 1.6% (n=2)         | 10.4%<br>(n=15)    | < 0.001 | -       | -       | -       |
| <b>Type 2 diabetes</b>                 | 2.4%<br>(n=17)     | 12.1%<br>(n=15)    | 36.8%<br>(n=53)    | < 0.001 | -       | -       | -       |

507

508 **Table 1.** Baseline characteristics of the study group as means (standard deviations) or  
509 percentages. N= number of subjects. ALT, alanine aminotransferase, BMI, body mass index,  
510 GGT, gamma-glutamyltransferase, hs-CRP, high-sensitivity C-reactive protein, LDL, low-  
511 density lipoprotein, QUICKI, quantitative insulin sensitivity check index.

512

|                                  | Model 1             | Model 2             | Model 3             | Model 4             | Model 5              |
|----------------------------------|---------------------|---------------------|---------------------|---------------------|----------------------|
| <b>Moderate fat content</b>      | 1.51 (0.99-2.29)    | 1.44 (0.93-2.23)    | 1.31 (0.84-2.05)    | 1.30 (0.84-2.01)    | 1.49 (0.99-2.26)     |
| <b>Severe fat content</b>        | 1.92 (1.32-2.80)**  | 1.74 (1.16-2.63) ** | 1.49 (0.97-2.30)    | 1.43 (0.93-2.18)    | 1.76 (1.21- 2.56) ** |
| <b>Study group</b>               | 1.34 (0.98-1.85)    | 1.29 (0.92-1.80)    | 1.28 (0.92-1.78)    |                     |                      |
| <b>Age</b>                       | 1.06 (1.03-1.09)*** | 1.05(1.02-1.08)**   | 1.05 (1.02-1.08)**  | 1.05 (1.02-1.07)**  | 1.05 (1.02-1.08) **  |
| <b>Gender</b>                    | 2.39 (1.71-3.34)*   | 1.91 (1.34-2.71)*** | 1.80 (1.26-2.57)**  | 1.83 (1.29-2.60) ** | 1.92 (1.36-2.72) *** |
| <b>LDL-cholesterol</b>           |                     | 1.17 (0.99-1.39)    | 1.15 (0.97-1.37)    |                     |                      |
| <b>Smoking (pack-years)</b>      |                     | 1.02 (1.01-1.03)*** | 1.02 (1.01-1.03)*** | 1.02 (1.01-1.03)*** | 1.02 (1.01-1.03) *** |
| <b>Alcohol consumption (gr1)</b> |                     | 0.93 (0.59-1.45)    | 0.92(0.59-1.44)     |                     |                      |
| <b>Alcohol consumption (gr2)</b> |                     | 0.84 (0.44-1.60)    | 0.81(0.42-1.54)     |                     |                      |
| <b>Systolic blood pressure</b>   |                     | 1.01 (1.00-1.02)**  | 1.01 (1.00-1.02)*   | 1.01 (1.00-1.02)**  | 1.01 (1.00-1.02) **  |
| <b>Body mass index</b>           |                     | 0.99 (0.96-1.03)    | 0.97 (0.93-1.01)    |                     |                      |
| <b>QUICKI</b>                    |                     |                     | 0.12 (0.02-0.90)*   | 0.16 (0.03-0.99)*   |                      |

513

514

1  
2  
3  
4  
5  
6  
7 515 **Table 2.** Multivariate analysis for cardiovascular events with different degrees of adjustments  
8  
9 516 (Cox regression analysis). CVD event occurred in 13.5% of the subjects with no fat in the  
10  
11 517 liver (97/720), 24.2% (30/124) of subjects having moderate liver fat content and 29.2%  
12  
13 518 (42/144) of the subjects having severe fatty liver. Hazard ratios with 95% confidence interval  
14  
15 519 with different degrees of adjustments are presented. Alcohol consumption was divided into  
16  
17 520 groups (reference group: less than 1g/week in men and women, group 1: less than 210g/week  
18  
19 521 in men and less than 140 g/week in women, group 2: more than 210g/week in men and more  
20  
21 522 than 140g/week in women). Model 1: adjustment for study group, age and gender. Model 2:  
22  
23 523 further adjustments for LDL-cholesterol, smoking, alcohol consumption, systolic blood  
24  
25 524 pressure and body mass index. Model 3: further adjustment for QUICKI. Model 4:  
26  
27 525 adjustments with statistically significant covariates. Model 5: adjustments with statistically  
28  
29 526 significant covariates without QUICKI. LDL, low-density lipoprotein, QUICKI, quantitative  
30  
31 527 insulin sensitivity check index. \*\*\*  $p < 0.001$ , \*\*  $p < 0.01$ , \*  $p < 0.05$ .

32 528

33  
34  
35 52936  
37  
38 53039  
40  
41 53142  
43  
44 53245  
46  
47 53348  
49  
50 534

51

52

53

54

55

56

57

58

59

60



| Grade of liver<br>brightness | Total       | 0<br>(n=720) | 1<br>(n=124) | 2<br>(n=144) | p       |
|------------------------------|-------------|--------------|--------------|--------------|---------|
| <b>Non-fatal events</b>      |             |              |              |              |         |
| <b>CVD</b>                   | 11.6% (115) | 9.9% (71)    | 16.1% (20)   | 16.7% (24)   | < 0.05  |
| <b>CHD</b>                   | 7.8% (77)   | 6.5% (47)    | 11.3% (14)   | 11.1% (16)   | NS      |
| <b>Stroke</b>                | 5.0% (49)   | 4.2% (30)    | 8.1% (10)    | 6.2% (9)     | NS      |
| <b>Fatal events</b>          |             |              |              |              |         |
| <b>CVD</b>                   | 5.5% (54)   | 3.6% (26)    | 8.1% (10)    | 12.5% (18)   | < 0.001 |
| <b>CHD</b>                   | 4.8% (47)   | 3.2% (23)    | 7.3% (9)     | 10.4% (15)   | < 0.01  |
| <b>Stroke</b>                | 0.8% (8)    | 0.6% (4)     | 0.8% (1)     | 2.1% (3)     | NS      |

**Table 3.** CVD, CHD and stroke follow-up data of the study group as percentages (number of events). **Statistical significances between percentages were measured by using  $\chi^2$  test.** CVD included a major CHD event and stroke (excluding subarachnoid hemorrhage) - whichever of these happened first. N=number of subjects. CHD, coronary heart disease, CVD, cardiovascular disease.

**Comment [PP2]:** Sentence added

|                    | Cardiovascular event    | Binary R <sup>2</sup> |     |
|--------------------|-------------------------|-----------------------|-----|
|                    |                         |                       | 540 |
| <b>Final model</b> | <b>c-index (95% CI)</b> |                       | 541 |
|                    |                         |                       | 542 |
| <b>Model 3</b>     | 0.729 (0.706-0.776)     | 0.153                 | 543 |
|                    |                         |                       | 544 |
| <b>Model 4</b>     | 0.720 (0.689-0.763)     | 0.144                 |     |
|                    |                         |                       | 545 |
| <b>Model 5</b>     | 0.717 (0.686-0.758)     | 0.138                 |     |
|                    |                         |                       | 546 |
| <b>Model 1</b>     | 0.698 (0.656-0.742)     | 0.133                 |     |
|                    |                         |                       | 547 |

**Table 4.** Multivariate analysis for cardiovascular events (logistic regression analysis). Cardiovascular disease risk factors have been removed from the models step by step. Model 3 included liver brightness, study group, age, gender, smoking, alcohol consumption, systolic blood pressure, LDL-cholesterol level, body mass index and QUICKI. Model 4 included liver brightness, age, gender, smoking, blood pressure and QUICKI. Model 5 included liver brightness, age, gender, smoking, blood pressure. Model 1 included liver brightness, study group, age and gender. C-index with confidence intervals obtained from 250 bootstrap resamplings and binary R<sup>2</sup> was used. LDL, low-density lipoprotein, QUICKI, quantitative insulin sensitivity check index.

1  
2  
3  
4  
5  
6  
7  
8  
9  
10  
11  
12  
13  
14  
15  
16  
17  
18  
19  
20  
21  
22  
23  
24  
25  
26  
27  
28  
29  
30  
31  
32  
33  
34  
35  
36  
37  
38  
39  
40  
41  
42  
43  
44  
45  
46  
47  
48  
49  
50  
51  
52  
53  
54  
55  
56  
57  
58  
59  
60

557

For peer review only

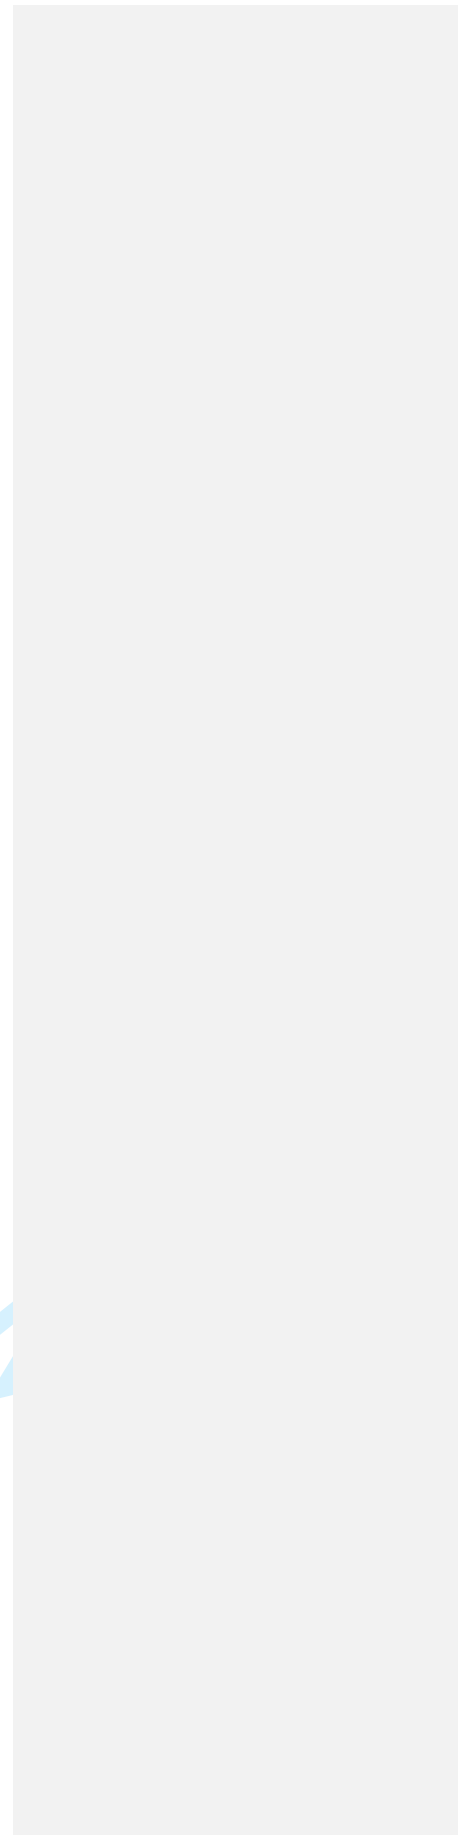

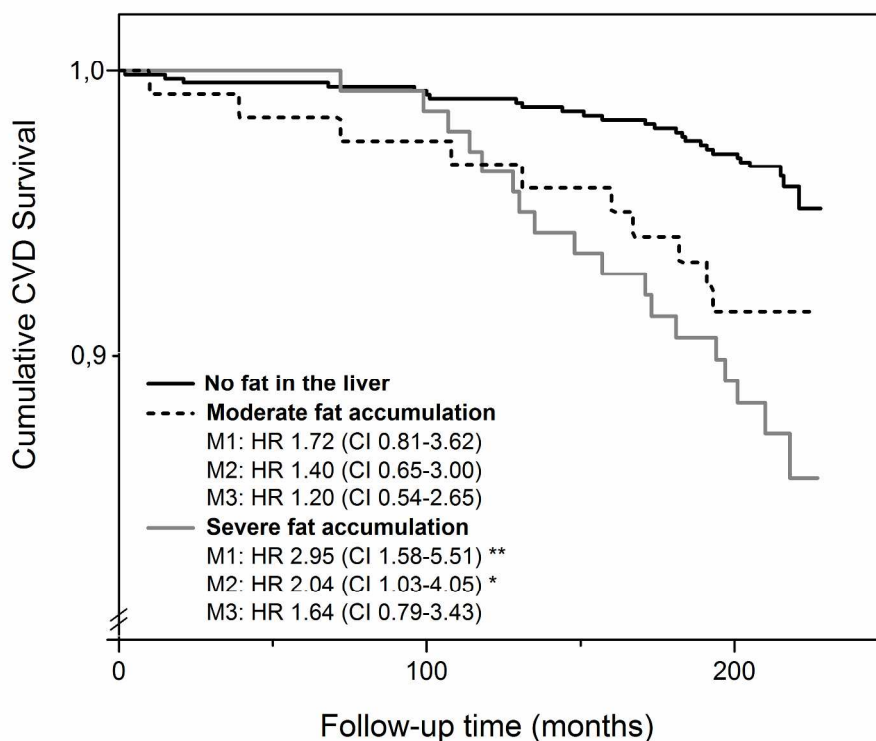

35 Title: Kaplan Meier cumulative survival rates censored for cardiovascular death in subjects with no fat in the  
 36 liver, moderate fat content and severe fat content.

37 CVD was the cause of death in 3.6% of the subjects (26/720) with non-fatty liver and 8.1% of the subjects  
 38 (10/124) with moderate liver fat content, while 12.5% of the subjects with severe fatty liver (18/144). Cox  
 39 regression analysis is used for adjustments. M1 (Model 1): adjusted for study group, age and gender. M2  
 40 (Model 2): further adjustments for smoking, alcohol consumption, systolic blood pressure, LDL-cholesterol  
 41 level and body mass index. M3 (Model 3): further adjustment for QUICKI. CVD, cardiovascular disease, CI,  
 42 confidence interval, HR, hazard ratio, QUICKI, quantitative insulin sensitivity check index. \*\*  $p < 0.01$ , \*  $p$   
 43  $< 0.05$ .

44 247x209mm (300 x 300 DPI)

45  
46  
47  
48  
49  
50  
51  
52  
53  
54  
55  
56  
57  
58  
59  
60



STROBE Statement—Items to be included when reporting observational studies in a conference abstract

| Item                                                                                                       | Recommendation                                                                                                                                                                                                                                                                                                                                                                                                                                                                                  |
|------------------------------------------------------------------------------------------------------------|-------------------------------------------------------------------------------------------------------------------------------------------------------------------------------------------------------------------------------------------------------------------------------------------------------------------------------------------------------------------------------------------------------------------------------------------------------------------------------------------------|
| Title                                                                                                      | Indicate the study's design with a commonly used term in the title (e.g cohort, case-control, cross sectional) <b>page 1</b>                                                                                                                                                                                                                                                                                                                                                                    |
| Authors                                                                                                    | Contact details for the corresponding author <b>page 1</b>                                                                                                                                                                                                                                                                                                                                                                                                                                      |
| Study design                                                                                               | Description of the study design (e.g cohort, case-control, cross sectional) <b>page 6</b>                                                                                                                                                                                                                                                                                                                                                                                                       |
| Objective                                                                                                  | Specific objectives or hypothesis <b>page 5</b>                                                                                                                                                                                                                                                                                                                                                                                                                                                 |
| Methods                                                                                                    | <b>page 5</b>                                                                                                                                                                                                                                                                                                                                                                                                                                                                                   |
| Setting                                                                                                    | Description of setting, follow-up dates or dates at which the outcome events occurred or at which the outcomes were present, as well as any points or ranges on other time scales for the outcomes (e.g., prevalence at age 18, 1998-2007). <b>page 7</b>                                                                                                                                                                                                                                       |
| Participants                                                                                               | <p><i>Cohort study</i>—Give the most important eligibility criteria, and the most important sources and methods of selection of participants. Describe briefly the methods of follow-up <b>page 6</b></p> <p><i>Case-control study</i>—Give the major eligibility criteria, and the major sources and methods of case ascertainment and control selection</p> <p><i>Cross-sectional study</i>—Give the eligibility criteria, and the major sources and methods of selection of participants</p> |
| <i>Cohort study</i> —For matched studies, give matching and number of exposed and unexposed <b>page 7</b>  |                                                                                                                                                                                                                                                                                                                                                                                                                                                                                                 |
| <i>Case-control study</i> —For matched studies, give matching criteria and the number of controls per case |                                                                                                                                                                                                                                                                                                                                                                                                                                                                                                 |
| Variables                                                                                                  | Clearly define primary outcome for this report. <b>page 10</b>                                                                                                                                                                                                                                                                                                                                                                                                                                  |
| Statistical methods                                                                                        | Describe statistical methods, including those used to control for confounding <b>page 9</b>                                                                                                                                                                                                                                                                                                                                                                                                     |
| Results                                                                                                    |                                                                                                                                                                                                                                                                                                                                                                                                                                                                                                 |
| Participants                                                                                               | Report Number of participants at the beginning and end of the study <b>page 7</b>                                                                                                                                                                                                                                                                                                                                                                                                               |
| Main results                                                                                               | <p>Report estimates of associations. If relevant, consider translating estimates of relative risk into absolute risk for a meaningful time period</p> <p>Report appropriate measures of variability and uncertainty (e.g., odds ratios with confidence intervals) <b>page 10</b></p>                                                                                                                                                                                                            |
| Conclusions                                                                                                | General interpretation of study results <b>page 12</b>                                                                                                                                                                                                                                                                                                                                                                                                                                          |

1  
2  
3  
4  
5  
6  
7  
8  
9  
10  
11  
12  
13  
14  
15  
16  
17  
18  
19  
20  
21  
22  
23  
24  
25  
26  
27  
28  
29  
30  
31  
32  
33  
34  
35  
36  
37  
38  
39  
40  
41  
42  
43  
44  
45  
46  
47  
48  
49  
50  
51  
52  
53  
54  
55  
56  
57  
58  
59  
60

For peer review only
